# Supplementary material
Source: PubMed Central journal article supplement (PMC4014284)
Supplement: supp_M113.036558_mcp.M113.036558-1.pdf [file supp_M113.036558_mcp.M113.036558-1.pdf]

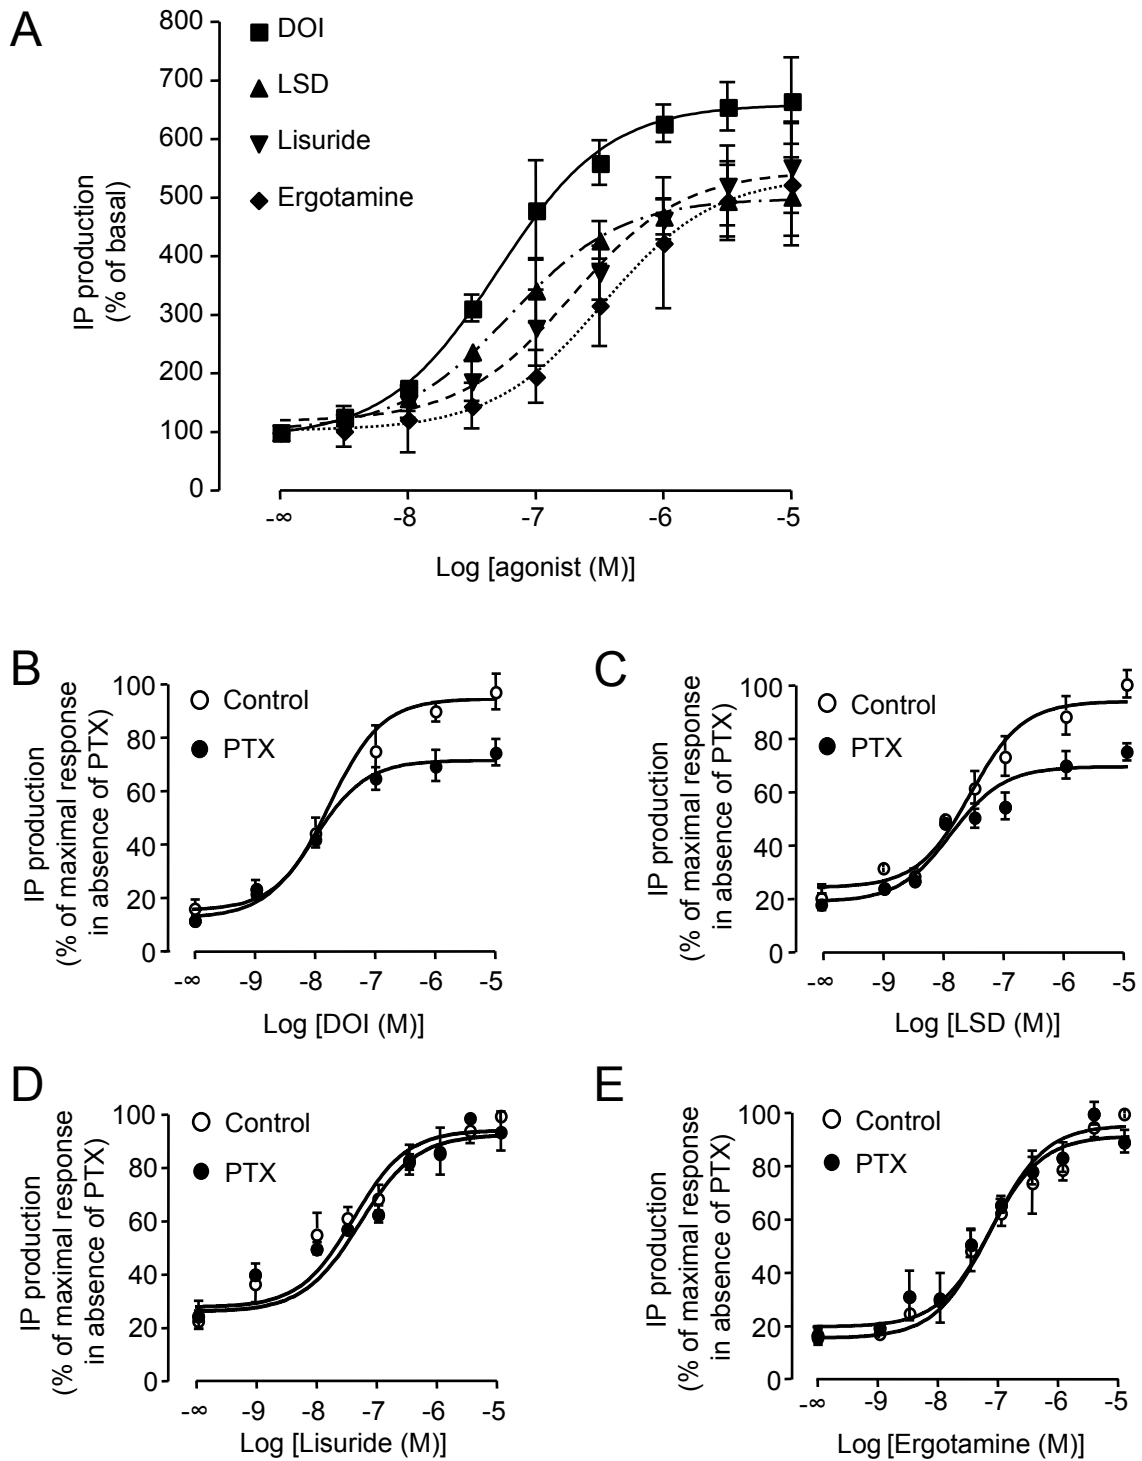

Figure S1

**Figure S1. Role of Gi/o proteins in inositol phosphate production elicited by hallucinogenic and non-hallucinogenic 5-HT<sub>2A</sub> receptor agonists.** HEK-293 cells transiently expressing 5-HT<sub>2A</sub> receptors were pretreated or not with PTX (0.2 µg/ml, 18 h) and exposed to incremental concentrations of DOI or LSD or lisuride or ergotamine. Data were expressed in % of basal inositol phosphate production (**A**) or in % of the maximal response elicited by the agonist in cells not treated with PTX (**B-E**). They are the means ± SEM of quadruplicate determinations performed in a typical experiment. Two other independent experiments yielded similar results.
