# Supplementary material
Source: PubMed Central journal article supplement (PMC4014284)
Supplement: supp_M113.036558_mcp.M113.036558-2.pdf [file supp_M113.036558_mcp.M113.036558-2.pdf]

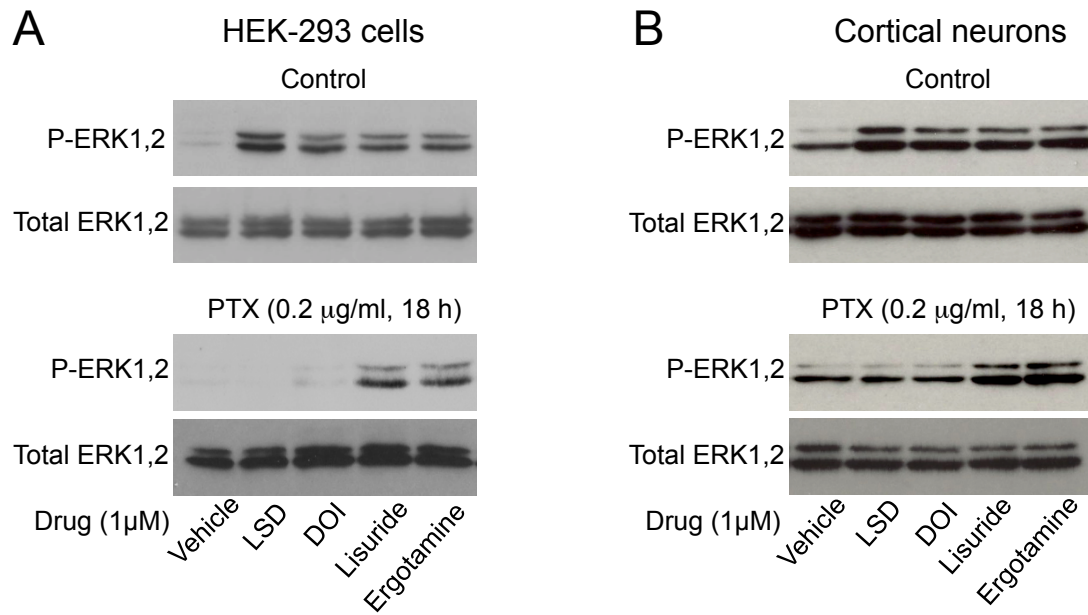

Figure S2

**Figure S2. Role of  $G_{i/o}$  proteins in Erk1,2 signaling elicited by hallucinogenic and non-hallucinogenic 5-HT<sub>2A</sub> receptor agonists.** HEK-293 cells transiently expressing 5-HT<sub>2A</sub> receptors (**A**) and primary cultured cortical neurons (**B**) were pretreated or not with PTX (0.2  $\mu$ g/ml, 18 h) and then exposed to either vehicle or DOI or LSD or lisuride or ergotamine (1  $\mu$ M each, 15 min). The impact of the treatments on Erk1,2 signaling was determined by sequential immunoblotting with an antibody against phosphorylated Erk1,2 and an antibody recognizing Erk1,2 independently of their phosphorylation state. Immunoblots representative of three independent experiments are shown.
