# Supplementary material
Source: PubMed Central journal article supplement (PMC4014284)
Supplement: supp_M113.036558_mcp.M113.036558-3.pdf [file supp_M113.036558_mcp.M113.036558-3.pdf]

# ProPhosSI MS/MS report

Mass: 480.5522 Charge: 3+

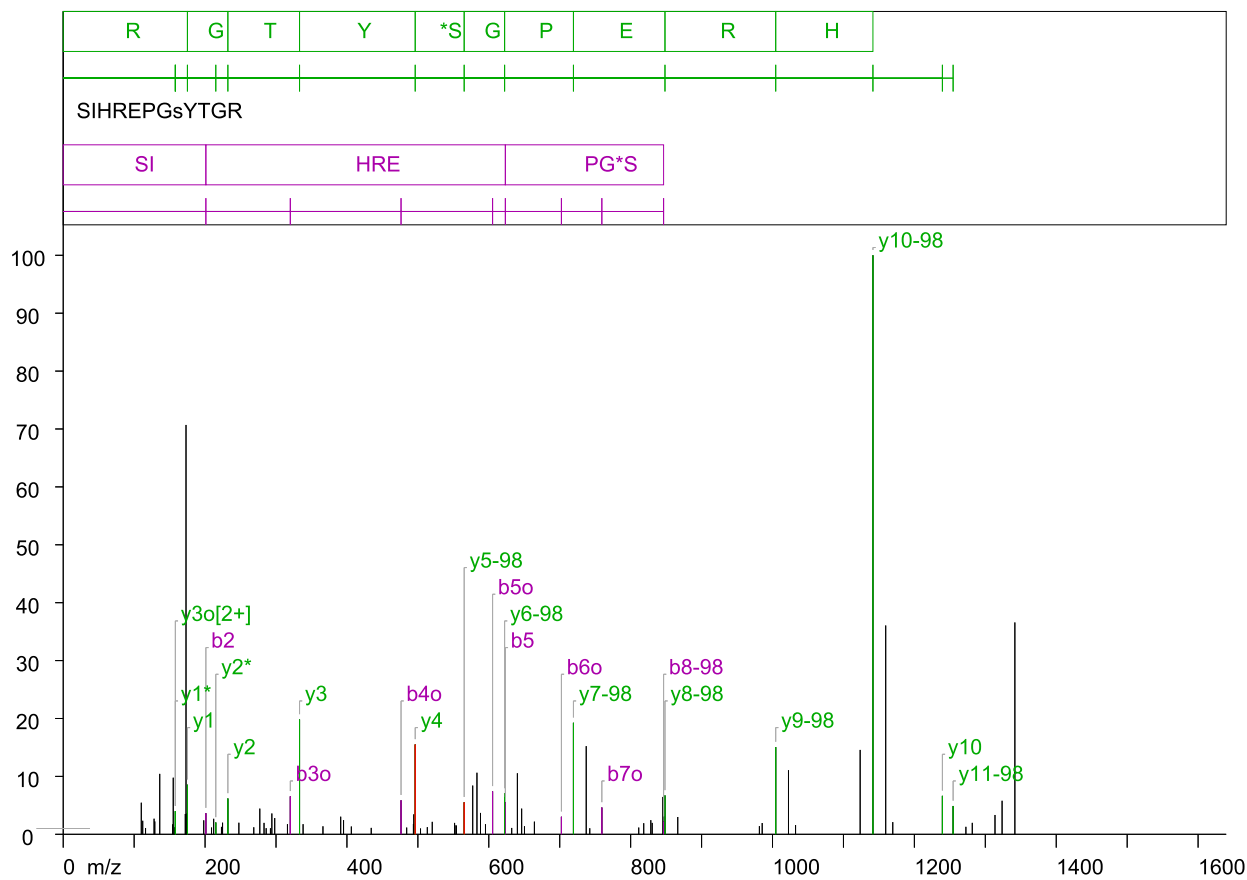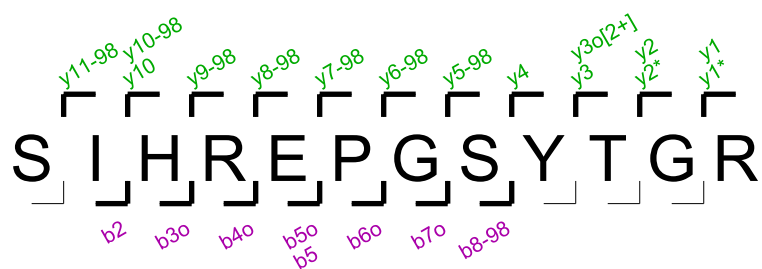

Figure S3

## 5-HT2A

(19) 298 SIHREPGsYTGR 309 1438.635 (-0.0023) Da

|                         |     |
|-------------------------|-----|
| Parent Ion              | m/z |
| No parent ions observed |     |

### Modifications and supporting evidence

| Position | Residue ID | Modification | Evidence    |
|----------|------------|--------------|-------------|
| 8        | (305)      | Phospho (ST) | y4 => y5-98 |

### Spectrum interpretation

| Rule                                   | passed/tests | Description                                                                                                                                                                                                                                                                                                                                                                                                                                                                                                                                                                                                                                                                                                                                  |
|----------------------------------------|--------------|----------------------------------------------------------------------------------------------------------------------------------------------------------------------------------------------------------------------------------------------------------------------------------------------------------------------------------------------------------------------------------------------------------------------------------------------------------------------------------------------------------------------------------------------------------------------------------------------------------------------------------------------------------------------------------------------------------------------------------------------|
| Parent ions present                    | 0/1          | Parent ions corresponding to the parent fragment - 1 phosphate ions were not found                                                                                                                                                                                                                                                                                                                                                                                                                                                                                                                                                                                                                                                           |
| Three -98 Ions present                 | 1/1          | 8 des-phospho fragment ions were found.                                                                                                                                                                                                                                                                                                                                                                                                                                                                                                                                                                                                                                                                                                      |
| Unique -98 transitions present         | 1/1          | transition b5 to b8-98, transition y4 to y5-98 support unique phosphorylation at position 8<br><br/>                                                                                                                                                                                                                                                                                                                                                                                                                                                                                                                                                                                                                                         |
| Four Sequential b or y ions            | 1/1          | Sequence of four y ions found from y1 to y4.                                                                                                                                                                                                                                                                                                                                                                                                                                                                                                                                                                                                                                                                                                 |
| Five of six sequential ions present    | 1/1          | Five of Six ions found between y0 and y5<br>Five of Six ions found between y1 and y6<br>Five of Six ions found between y2 and y7<br>Five of Six ions found between y3 and y8<br>Five of Six ions found between y4 and y9<br>Five of Six ions found between y5 and y10<br>Five of Six ions found between y6 and y11<br>Five of Six ions found between y7 and y12                                                                                                                                                                                                                                                                                                                                                                              |
| Proline directed fragmentation pattern | 2/2          | PASS: y7-98> y6-98 with ratio 2.73<br/><br>PASS: b6< b5<br/>                                                                                                                                                                                                                                                                                                                                                                                                                                                                                                                                                                                                                                                                                 |
| PhosphoTyrosine transition present     | 0/0          | 0 of 0 phosphotyrosine transitions were found.                                                                                                                                                                                                                                                                                                                                                                                                                                                                                                                                                                                                                                                                                               |
| Six of top ten ions identified         | 6/6          | ion 1 (mass: 1141.54739802914: intensity: 44986.46) assigned 1 times<br>ion 2 (mass: 173.128267363354: intensity: 31804.3) assigned 1 times<br>ion 3 (mass: 1341.66350384628: intensity: 16458.98) assigned 0 times<br>ion 4 (mass: 1159.55771029917: intensity: 16222.57) assigned 0 times<br>ion 5 (mass: 333.187740955122: intensity: 8918.521) assigned 1 times<br>ion 6 (mass: 719.345574992868: intensity: 8661.293) assigned 1 times<br>ion 7 (mass: 496.250112167794: intensity: 6978.598) assigned 1 times<br>ion 8 (mass: 737.357172637009: intensity: 6848.646) assigned 0 times<br>ion 9 (mass: 1004.48869263796: intensity: 6775.796) assigned 1 times<br>ion 10 (mass: 1123.52751604662: intensity: 6555.282) assigned 0 times |

### Ion Table

27 ions assigned of 58 ions above threshold (46%).

#### N-terminal ions

| AA | N-ion | b                               | b*      | b-98 | bo      |
|----|-------|---------------------------------|---------|------|---------|
| S  | 1     | 88.039                          | 71.013  | -    | 70.029  |
| I  | 2     | 201.123<br>201.122769713569 (3) | 184.097 | -    | 183.113 |

Figure S3

|   |    |                                 |          |                                 |                                 |
|---|----|---------------------------------|----------|---------------------------------|---------------------------------|
| H | 3  | 338.182                         | 321.156  | -                               | 320.172<br>320.171716192964 (6) |
| R | 4  | 494.283                         | 477.257  | -                               | 476.273<br>476.27210229895 (5)  |
| E | 5  | 623.326<br>623.327106517243 (5) | 606.300  | -                               | 605.315<br>605.315428579618 (7) |
| P | 6  | 720.379                         | 703.352  | -                               | 702.368<br>702.365826177584 (3) |
| G | 7  | 777.400                         | 760.374  | -                               | 759.390<br>759.389875865003 (4) |
| s | 8  | 944.399                         | 927.372  | 846.413<br>846.416022543775 (2) | 926.388                         |
| Y | 9  | 1107.462                        | 1090.435 | 1009.476                        | 1089.451                        |
| T | 10 | 1208.510                        | 1191.483 | 1110.524                        | 1190.499                        |
| G | 11 | 1265.531                        | 1248.505 | 1167.545                        | 1247.521                        |
| R | 12 | -                               | -        | -                               | -                               |

### C-terminal ions

| AA | C-ion | y                                | y*                               | y-98                               | yo                                       |
|----|-------|----------------------------------|----------------------------------|------------------------------------|------------------------------------------|
| S  | 12    | -                                | -                                | -                                  | -                                        |
| I  | 11    | 1352.611                         | 1335.584                         | 1254.625<br>1254.62997686966 (4)   | 1334.600                                 |
| H  | 10    | 1239.527<br>1239.52446492728 (6) | 1222.500                         | 1141.541<br>1141.54739802914 (100) | 1221.516                                 |
| R  | 9     | 1102.468                         | 1085.441                         | 1004.482<br>1004.48869263796 (15)  | 1084.457                                 |
| E  | 8     | 946.367                          | 929.340                          | 848.381<br>848.389900903719 (6)    | 928.356                                  |
| P  | 7     | 817.324                          | 800.298                          | 719.338<br>719.345574992868 (19)   | 799.313                                  |
| G  | 6     | 720.271                          | 703.245                          | 622.285<br>622.292991198655 (7)    | 702.261                                  |
| s  | 5     | 663.250                          | 646.223                          | 565.264<br>565.271975898375 (5)    | 645.239                                  |
| Y  | 4     | 496.251<br>496.250112167794 (15) | 479.225                          | -                                  | 478.241                                  |
| T  | 3     | 333.188<br>333.187740955122 (19) | 316.162                          | -                                  | 315.178<br>*158.092181421098 [2+]<br>(3) |
| G  | 2     | 232.140<br>232.139823910178 (6)  | 215.114<br>*215.114104417971 (2) | -                                  | 214.130                                  |
| R  | 1     | 175.119<br>175.1188112221 (8)    | 158.092<br>*158.092181421098 (3) | -                                  | 157.108                                  |

### Ion distribution

| Threshold | Ion count | Matches | % matched |
|-----------|-----------|---------|-----------|
| 0         | 167       | 43      | 25        |
| 0.5       | 131       | 42      | 32        |
| 1         | 91        | 36      | 39        |
| 2         | 57        | 26      | 45        |
| 3         | 43        | 23      | 53        |
| 4         | 33        | 20      | 60        |
| 5         | 29        | 18      | 62        |

Figure S3

|    |    |   |    |
|----|----|---|----|
| 10 | 14 | 6 | 42 |
|----|----|---|----|

**Observed ions > 1%**

| m/z              | Intensity             | % max | Assignment (delta)                         |
|------------------|-----------------------|-------|--------------------------------------------|
| 110.071076830779 | 2454.305 <sub>2</sub> | 5.45  |                                            |
| 112.086742942952 | 1050.391 <sub>2</sub> | 2.33  |                                            |
| 116.070168040569 | 489.2661 <sub>2</sub> | 1.08  |                                            |
| 128.106678287448 | 1210.183 <sub>2</sub> | 2.69  |                                            |
| 129.102281820922 | 996.1835 <sub>2</sub> | 2.21  |                                            |
| 136.075537451598 | 4694.133 <sub>2</sub> | 10.43 |                                            |
| 154.086152299264 | 766.0502 <sub>2</sub> | 1.70  |                                            |
| 155.117711920818 | 4397.351 <sub>2</sub> | 9.77  | a2o (-0.00)                                |
| 157.107434236106 | 543.4645 <sub>2</sub> | 1.20  | y1o (-0.00)                                |
| 158.092181421098 | 1798.877 <sub>2</sub> | 3.99  | y1* (-0.00) : z1 (-0.00) : y3o[2+] (-0.00) |
| 172.097676354675 | 1578.232 <sub>2</sub> | 3.50  |                                            |
| 173.128267363354 | 31804.3 <sub>2</sub>  | 70.69 | a2 (-0.00)                                 |
| 174.131935646885 | 1609.095 <sub>2</sub> | 3.57  |                                            |
| 175.1188112221   | 3847.437 <sub>2</sub> | 8.55  | y1 (-0.00)                                 |
| 198.110720465684 | 1084.236 <sub>2</sub> | 2.41  |                                            |
| 201.122769713569 | 1641.54 <sub>2</sub>  | 3.64  | b2 (-0.00)                                 |
| 209.093127220799 | 525.1947 <sub>2</sub> | 1.16  |                                            |
| 212.107887020317 | 1203.554 <sub>2</sub> | 2.67  |                                            |
| 215.114104417971 | 917.289 <sub>2</sub>  | 2.03  | y2* (-0.00) : z2 (-0.00)                   |
| 223.107291724338 | 574.8371 <sub>2</sub> | 1.27  |                                            |
| 224.642198621442 | 901.2441 <sub>2</sub> | 2.00  | a4o[2+] (-0.00)                            |
| 232.139823910178 | 2780.697 <sub>2</sub> | 6.18  | y2 (-0.00)                                 |
| 247.645068826104 | 897.6563 <sub>2</sub> | 1.99  | b4[2+] (-0.00)                             |
| 268.650235767384 | 543.7061 <sub>2</sub> | 1.20  |                                            |
| 277.140888243323 | 1994.866 <sub>2</sub> | 4.43  |                                            |
| 283.140609162195 | 886.0125 <sub>2</sub> | 1.96  | y5-98[2+] (0.00)                           |
| 286.152345542359 | 475.0163 <sub>2</sub> | 1.05  |                                            |
| 292.174451389299 | 467.0362 <sub>2</sub> | 1.03  | a3o (-0.00)                                |
| 294.167178001733 | 1616.965 <sub>2</sub> | 3.59  |                                            |
| 298.169941088898 | 1258.481 <sub>2</sub> | 2.79  | a5[2+] (0.00)                              |
| 316.16079132642  | 783.9474 <sub>2</sub> | 1.74  | y3* (-0.00) : z3 (-0.00)                   |
| 320.171716192964 | 2947.234 <sub>2</sub> | 6.55  | b3o (-0.00)                                |
| 333.187740955122 | 8918.521 <sub>2</sub> | 19.82 | y3 (-0.00)                                 |
| 338.182145398699 | 785.4046 <sub>2</sub> | 1.74  | b3 (-0.00) : a6*[2+] (-0.00)               |
| 366.20048450588  | 620.6774 <sub>2</sub> | 1.37  | a7o[2+] (-0.00)                            |
| 391.190164483198 | 1367.319 <sub>2</sub> | 3.03  |                                            |
| 395.214813943905 | 1098.155 <sub>2</sub> | 2.44  |                                            |
| 406.182324393038 | 604.7844 <sub>2</sub> | 1.34  |                                            |

Figure S3

|                  |                       |       |               |
|------------------|-----------------------|-------|---------------|
| 434.255563645439 | 497.3898 <sub>2</sub> | 1.10  |               |
| 476.27210229895  | 2641.643 <sub>2</sub> | 5.87  | b4o (-0.00)   |
| 484.220848757801 | 522.1862 <sub>2</sub> | 1.16  |               |
| 493.741901545571 | 799.8482 <sub>2</sub> | 1.77  |               |
| 494.237456448707 | 1548.247 <sub>2</sub> | 3.44  |               |
| 496.250112167794 | 6978.598 <sub>2</sub> | 15.51 | y4 (-0.00)    |
| 513.313764564873 | 554.2643 <sub>2</sub> | 1.23  |               |
| 520.262459462494 | 966.4487 <sub>2</sub> | 2.14  |               |
| 551.73855844142  | 883.6255 <sub>2</sub> | 1.96  | y9[2+] (0.00) |
| 553.76437739151  | 698.5909 <sub>2</sub> | 1.55  |               |
| 554.256369829851 | 654.6957 <sub>2</sub> | 1.45  |               |
| 565.271975898375 | 2487.078 <sub>2</sub> | 5.52  | y5-98 (0.00)  |
| 577.321064695588 | 3784.517 <sub>2</sub> | 8.41  | a5o (-2.03)   |
| 583.282146582763 | 4782.396 <sub>2</sub> | 10.63 |               |
| 588.284787843726 | 1658.776 <sub>2</sub> | 3.68  |               |
| 595.33330447741  | 783.0561 <sub>2</sub> | 1.74  | a5 (0.00)     |
| 605.315428579618 | 3332.373 <sub>2</sub> | 7.40  | b5o (-0.00)   |
| 622.292991198655 | 3168.379 <sub>2</sub> | 7.04  | y6-98 (0.00)  |
| 623.327106517243 | 2486.213 <sub>2</sub> | 5.52  | b5 (0.00)     |
| 632.279768050137 | 492.2994 <sub>2</sub> | 1.09  |               |
| 640.302910738211 | 4740.84 <sub>2</sub>  | 10.53 |               |
| 646.302397227137 | 1994.46 <sub>2</sub>  | 4.43  |               |
| 650.28781272197  | 624.7202 <sub>2</sub> | 1.38  |               |
| 664.292443229736 | 982.4763 <sub>2</sub> | 2.18  |               |
| 702.365826177584 | 1360.006 <sub>2</sub> | 3.02  | b6o (-0.00)   |
| 719.345574992868 | 8661.293 <sub>2</sub> | 19.25 | y7-98 (0.00)  |
| 737.357172637009 | 6848.646 <sub>2</sub> | 15.22 |               |
| 742.356767068762 | 468.9181 <sub>2</sub> | 1.04  |               |
| 759.389875865003 | 2081.157 <sub>2</sub> | 4.62  | b7o (-0.00)   |
| 811.377117946756 | 522.7847 <sub>2</sub> | 1.16  |               |
| 818.42739371774  | 859.532 <sub>2</sub>  | 1.91  |               |
| 828.411541627073 | 1096.676 <sub>2</sub> | 2.43  |               |
| 830.37852526995  | 884.2842 <sub>2</sub> | 1.96  |               |
| 845.415563251431 | 2900.609 <sub>2</sub> | 6.44  |               |
| 846.416022543775 | 981.6791 <sub>2</sub> | 2.18  | b8-98 (0.00)  |
| 848.389900903719 | 3015.715 <sub>2</sub> | 6.70  | y8-98 (0.00)  |
| 866.395009921475 | 1343.407 <sub>2</sub> | 2.98  |               |
| 981.489141769933 | 633.0308 <sub>2</sub> | 1.40  |               |
| 985.447603657645 | 874.1708 <sub>2</sub> | 1.94  |               |
| 1004.48869263796 | 6775.796 <sub>2</sub> | 15.06 | y9-98 (0.00)  |
| 1022.50039036938 | 4975.601 <sub>2</sub> | 11.06 |               |
| 1032.48010537916 | 714.6226 <sub>2</sub> | 1.58  |               |
| 1123.52751604662 | 6555.282 <sub>2</sub> | 14.57 |               |

Figure S3

|                  |                       |       |               |
|------------------|-----------------------|-------|---------------|
| 1141.54739802914 | 44986.46 <sub>2</sub> | 100   | y10-98 (0.00) |
| 1159.55771029917 | 16222.57 <sub>2</sub> | 36.06 |               |
| 1169.53917620416 | 944.6916 <sub>2</sub> | 2.09  |               |
| 1239.52446492728 | 2985.584 <sub>2</sub> | 6.63  | y10 (-0.00)   |
| 1254.62997686966 | 2199.473 <sub>2</sub> | 4.88  | y11-98 (0.00) |
| 1272.64146974132 | 580.8317 <sub>2</sub> | 1.29  |               |
| 1281.60705586191 | 888.5591 <sub>2</sub> | 1.97  |               |
| 1313.67024780943 | 1500.13 <sub>2</sub>  | 3.33  |               |
| 1323.65136649451 | 2605.259 <sub>2</sub> | 5.79  |               |
| 1341.66350384628 | 16458.98 <sub>2</sub> | 36.58 |               |

Figure S3

# ProPhosSI MS/MS report

Mass: 480.5517 Charge: 3+

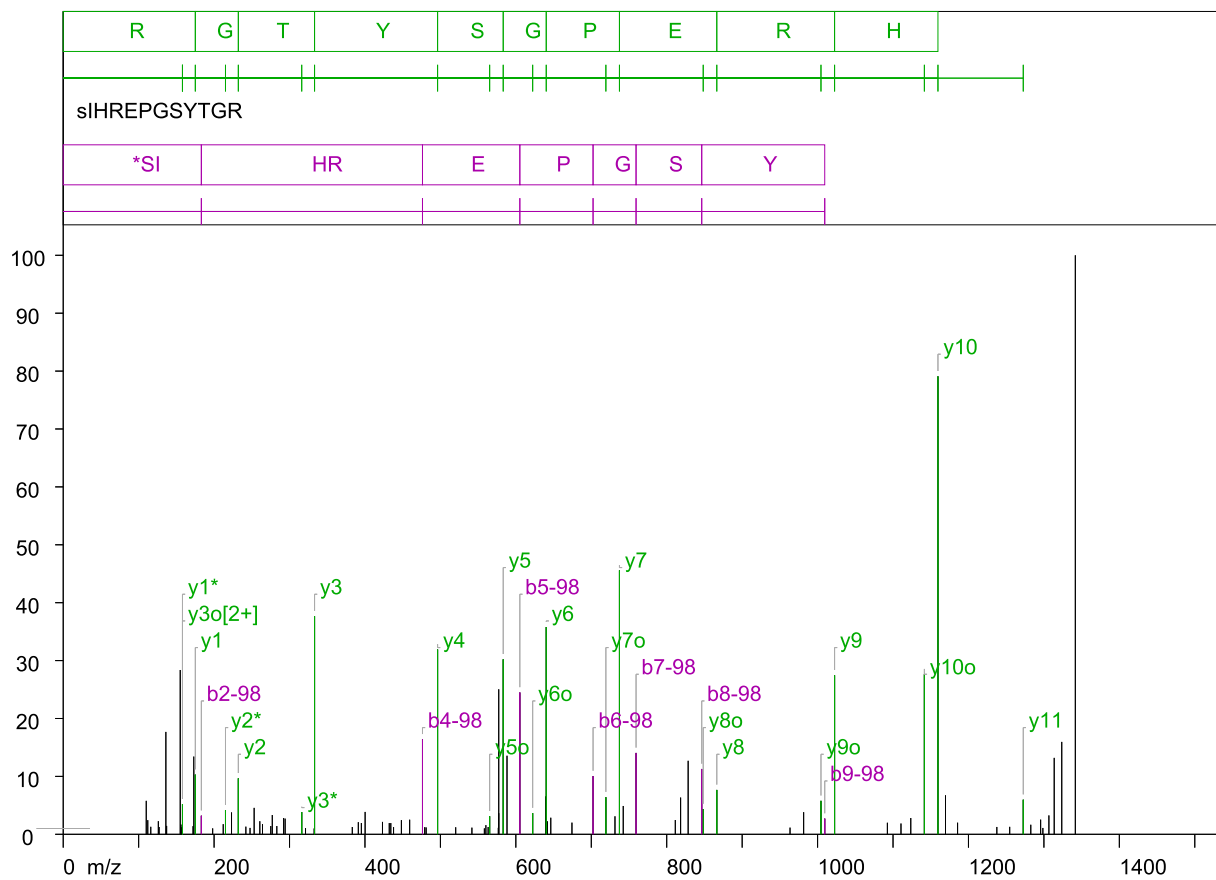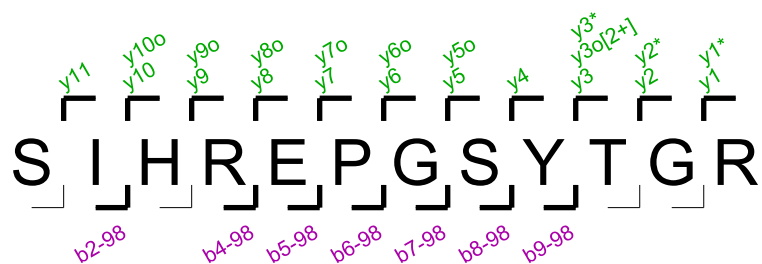

Figure S3

## 5-HT2A

(80) 298 SIHREPGSYTGR 309 1438.635 (-0.0038) Da

|                         |     |
|-------------------------|-----|
| Parent Ion              | m/z |
| No parent ions observed |     |

### Modifications and supporting evidence

| Position | Residue ID | Modification | Evidence |
|----------|------------|--------------|----------|
| 1        | (298)      | Phospho (ST) |          |

### Spectrum interpretation

| Rule                                   | passed/tests | Description                                                                                                                                                                                                                                                                                                                                                                                                                                                                                                                                                                                                                                                                                                                                 |
|----------------------------------------|--------------|---------------------------------------------------------------------------------------------------------------------------------------------------------------------------------------------------------------------------------------------------------------------------------------------------------------------------------------------------------------------------------------------------------------------------------------------------------------------------------------------------------------------------------------------------------------------------------------------------------------------------------------------------------------------------------------------------------------------------------------------|
| Parent ions present                    | 0/1          | Parent ions corresponding to the parent fragment - 1 phosphate ions were not found                                                                                                                                                                                                                                                                                                                                                                                                                                                                                                                                                                                                                                                          |
| Three -98 Ions present                 | 1/1          | 7 des-phospho fragment ions were found.                                                                                                                                                                                                                                                                                                                                                                                                                                                                                                                                                                                                                                                                                                     |
| Unique -98 transitions present         | 0/1          | No transitions found to support unique phosphorylation at position 1<br><br/>                                                                                                                                                                                                                                                                                                                                                                                                                                                                                                                                                                                                                                                               |
| Four Sequential b or y ions            | 1/1          | Sequence of four b ions found from b4-98 to b7-98.<br>Sequence of four y ions found from y1 to y4.                                                                                                                                                                                                                                                                                                                                                                                                                                                                                                                                                                                                                                          |
| Five of six sequential ions present    | 1/1          | Five of Six ions found between b2 and b7<br>Five of Six ions found between b3 and b8<br>Five of Six ions found between b4 and b9<br>Five of Six ions found between b5 and b10<br>Five of Six ions found between y0 and y5<br>Five of Six ions found between y1 and y6<br>Five of Six ions found between y2 and y7<br>Five of Six ions found between y3 and y8<br>Five of Six ions found between y4 and y9<br>Five of Six ions found between y5 and y10<br>Five of Six ions found between y6 and y11<br>Five of Six ions found between y7 and y12                                                                                                                                                                                            |
| Proline directed fragmentation pattern | 2/2          | PASS: y7> y6 with ratio 1.27<br/><br>PASS: b6-98< b5-98 with ratio 2.43<br/>                                                                                                                                                                                                                                                                                                                                                                                                                                                                                                                                                                                                                                                                |
| PhosphoTyrosine transition present     | 0/0          | 0 of 0 phosphotyrosine transitions were found.                                                                                                                                                                                                                                                                                                                                                                                                                                                                                                                                                                                                                                                                                              |
| Six of top ten ions identified         | 8/6          | ion 1 (mass: 1341.66428190574: intensity: 54190.61) assigned 0 times<br>ion 2 (mass: 1159.55888638911: intensity: 42862.47) assigned 1 times<br>ion 3 (mass: 737.356789040024: intensity: 24702.68) assigned 1 times<br>ion 4 (mass: 333.187958487745: intensity: 20414.28) assigned 1 times<br>ion 5 (mass: 640.3044195413: intensity: 19398.64) assigned 1 times<br>ion 6 (mass: 496.250786913584: intensity: 17297.91) assigned 1 times<br>ion 7 (mass: 583.281865540999: intensity: 16375.15) assigned 1 times<br>ion 8 (mass: 155.117804860757: intensity: 15375.14) assigned 0 times<br>ion 9 (mass: 1141.54436301008: intensity: 14976.99) assigned 1 times<br>ion 10 (mass: 1022.50002958932: intensity: 14881.49) assigned 1 times |

Figure S3



## Ion Table

29 ions assigned of 65 ions above threshold (44%).

N-terminal ions

| AA | N-ion | b        | b*       | b-98                             | bo       |
|----|-------|----------|----------|----------------------------------|----------|
| s  | 1     | 168.006  | 150.979  | 70.020                           | 149.995  |
| I  | 2     | 281.090  | 264.063  | 183.104<br>183.112610422417 (3)  | 263.079  |
| H  | 3     | 418.149  | 401.122  | 320.163                          | 400.138  |
| R  | 4     | 574.250  | 557.223  | 476.264<br>476.272991194634 (16) | 556.239  |
| E  | 5     | 703.292  | 686.266  | 605.306<br>605.315713430744 (24) | 685.282  |
| P  | 6     | 800.345  | 783.319  | 702.359<br>702.366877547714 (10) | 782.335  |
| G  | 7     | 857.367  | 840.340  | 759.381<br>759.387920543106 (14) | 839.356  |
| S  | 8     | 944.399  | 927.372  | 846.413<br>846.420647314435 (11) | 926.388  |
| Y  | 9     | 1107.462 | 1090.435 | 1009.476<br>1009.47975410937 (2) | 1089.451 |
| T  | 10    | 1208.510 | 1191.483 | 1110.524                         | 1190.499 |
| G  | 11    | 1265.531 | 1248.505 | 1167.545                         | 1247.521 |
| R  | 12    | -        | -        | -                                | -        |

C-terminal ions

| AA | C-ion | y                                 | y*                               | yo                                    |
|----|-------|-----------------------------------|----------------------------------|---------------------------------------|
| s  | 12    | -                                 | -                                | -                                     |
| I  | 11    | 1272.644<br>1272.64291718875 (5)  | 1255.618                         | 1254.634                              |
| H  | 10    | 1159.560<br>1159.55888638911 (79) | 1142.534                         | 1141.550<br>1141.54436301008 (27)     |
| R  | 9     | 1022.501<br>1022.50002958932 (27) | 1005.475                         | 1004.491<br>1004.48476856643 (5)      |
| E  | 8     | 866.400<br>866.398150269719 (7)   | 849.374                          | 848.390<br>848.386937011057 (4)       |
| P  | 7     | 737.358<br>737.356789040024 (45)  | 720.331                          | 719.347<br>719.344578842031 (6)       |
| G  | 6     | 640.305<br>640.3044195413 (35)    | 623.278                          | 622.294<br>622.291625623833 (3)       |
| S  | 5     | 583.284<br>583.281865540999 (30)  | 566.257                          | 565.273<br>565.272424698873 (3)       |
| Y  | 4     | 496.251<br>496.250786913584 (31)  | 479.225                          | 478.241                               |
| T  | 3     | 333.188<br>333.187958487745 (37)  | 316.162<br>*316.160901892697 (3) | 315.178<br>*158.092201751113 [2+] (5) |
| G  | 2     | 232.140<br>232.14030575892 (9)    | 215.114<br>*215.113745536328 (4) | 214.130                               |
| R  | 1     | 175.119<br>175.118844494869 (10)  | 158.092<br>*158.092201751113 (5) | 157.108                               |

Ion distribution

| Threshold | Ion count | Matches | % matched |
|-----------|-----------|---------|-----------|
| 0         | 167       | 41      | 24        |
| 0.5       | 134       | 40      | 29        |

Figure S3

|    |    |    |    |
|----|----|----|----|
| 1  | 99 | 34 | 34 |
| 2  | 64 | 29 | 45 |
| 3  | 48 | 27 | 56 |
| 4  | 37 | 23 | 62 |
| 5  | 33 | 20 | 60 |
| 10 | 23 | 14 | 60 |

### Observed ions > 1%

| m/z              | Intensity             | % max | Assignment (delta)                         |
|------------------|-----------------------|-------|--------------------------------------------|
| 110.071145568154 | 3131.183 <sub>2</sub> | 5.77  |                                            |
| 112.08700662787  | 1321.062 <sub>2</sub> | 2.43  |                                            |
| 116.070545059378 | 700.5259 <sub>2</sub> | 1.29  |                                            |
| 126.091042523963 | 1225.568 <sub>2</sub> | 2.26  |                                            |
| 127.122635599504 | 681.2238 <sub>2</sub> | 1.25  |                                            |
| 136.075587119945 | 9581.771 <sub>2</sub> | 17.68 |                                            |
| 137.079216568136 | 783.1667 <sub>2</sub> | 1.44  |                                            |
| 155.117804860757 | 15375.14 <sub>2</sub> | 28.37 |                                            |
| 156.121537171056 | 909.0309 <sub>2</sub> | 1.67  |                                            |
| 157.108491179957 | 652.6622 <sub>2</sub> | 1.20  | y1o (-0.00)                                |
| 158.092201751113 | 2829.971 <sub>2</sub> | 5.22  | y1* (-0.00) : z1 (-0.00) : y3o[2+] (-0.00) |
| 172.106243091294 | 757.1894 <sub>2</sub> | 1.39  |                                            |
| 173.128310988403 | 7273.57 <sub>2</sub>  | 13.42 |                                            |
| 175.118844494869 | 5579.059 <sub>2</sub> | 10.29 | y1 (-0.00)                                 |
| 183.112610422417 | 1737.389 <sub>2</sub> | 3.20  | b2-98 (0.00)                               |
| 198.112044138983 | 552.2602 <sub>2</sub> | 1.01  |                                            |
| 212.108612988614 | 946.1813 <sub>2</sub> | 1.74  |                                            |
| 215.113745536328 | 2254.97 <sub>2</sub>  | 4.16  | y2* (-0.00) : z2 (-0.00)                   |
| 223.10740228001  | 2044.852 <sub>2</sub> | 3.77  |                                            |
| 232.14030575892  | 5236.721 <sub>2</sub> | 9.66  | y2 (-0.00)                                 |
| 242.113287737645 | 713.8466 <sub>2</sub> | 1.31  |                                            |
| 247.644484094883 | 596.7056 <sub>2</sub> | 1.10  |                                            |
| 253.094787040832 | 2472.114 <sub>2</sub> | 4.56  | a2 (-0.00)                                 |
| 260.634838127631 | 1221.267 <sub>2</sub> | 2.25  |                                            |
| 264.182071630994 | 951.2807 <sub>2</sub> | 1.75  |                                            |
| 275.167600423796 | 769.3176 <sub>2</sub> | 1.41  |                                            |
| 277.140907862277 | 1800.585 <sub>2</sub> | 3.32  |                                            |
| 283.139178292044 | 770.4491 <sub>2</sub> | 1.42  | y5o[2+] (-0.00)                            |
| 292.176663270949 | 1519.757 <sub>2</sub> | 2.80  |                                            |
| 294.168020248633 | 1466.152 <sub>2</sub> | 2.70  |                                            |
| 316.160901892697 | 2079.863 <sub>2</sub> | 3.83  | y3* (-0.00) : z3 (-0.00)                   |
| 321.17543418855  | 573.3276 <sub>2</sub> | 1.05  |                                            |
| 333.187958487745 | 20414.28 <sub>2</sub> | 37.67 | y3 (-0.00)                                 |

Figure S3

|                  |           |       |                        |
|------------------|-----------|-------|------------------------|
| 383.203515546083 | 679.0351, | 1.25  |                        |
| 391.192931346075 | 1132.898, | 2.09  |                        |
| 395.214175397315 | 1052.432, | 1.94  |                        |
| 400.197851780108 | 2092.563, | 3.86  |                        |
| 423.210589153696 | 1158.745, | 2.13  |                        |
| 432.215056061196 | 1048.389, | 1.93  |                        |
| 434.254204645363 | 1048.766, | 1.93  |                        |
| 437.891508497632 | 670.83,   | 1.23  |                        |
| 448.277634061733 | 1325.867, | 2.44  |                        |
| 459.244297747327 | 1364.922, | 2.51  |                        |
| 476.272991194634 | 8884.699, | 16.39 | b4-98 (0.00)           |
| 479.225460892356 | 663.2619, | 1.22  | y4* (2.08) : z4 (2.08) |
| 481.115190142967 | 639.5734, | 1.18  |                        |
| 496.250786913584 | 17297.91, | 31.92 | y4 (-0.00)             |
| 520.262076975617 | 656.251,  | 1.21  |                        |
| 541.771395779703 | 621.3683, | 1.14  |                        |
| 558.269527518834 | 552.6188, | 1.01  |                        |
| 560.297944738835 | 851.821,  | 1.57  |                        |
| 563.260136651842 | 677.9745, | 1.25  |                        |
| 565.272424698873 | 1690.396, | 3.11  | y5o (-0.00)            |
| 576.77223720154  | 604.8056, | 1.11  |                        |
| 577.32054799328  | 13570.14, | 25.04 |                        |
| 577.327079840984 | 1976.361, | 3.64  |                        |
| 583.281865540999 | 16375.15, | 30.21 | y5 (-0.00)             |
| 588.288305817865 | 7352.627, | 13.56 |                        |
| 605.315713430744 | 13271.13, | 24.48 | b5-98 (0.00)           |
| 622.291625623833 | 1981.545, | 3.65  | y6o (-0.00)            |
| 639.335866347165 | 3535.485, | 6.52  |                        |
| 640.3044195413   | 19398.64, | 35.79 | y6 (-0.00)             |
| 641.815642108035 | 1212.874, | 2.23  |                        |
| 646.303258857081 | 1549.799, | 2.85  |                        |
| 674.370532663164 | 1090.435, | 2.01  |                        |
| 702.366877547714 | 5451.421, | 10.05 | b6-98 (0.00)           |
| 719.344578842031 | 3470.693, | 6.40  | y7o (-0.00)            |
| 731.395421622825 | 1682.974, | 3.10  |                        |
| 737.356789040024 | 24702.68, | 45.58 | y7 (-0.00)             |
| 742.363910283723 | 2649.273, | 4.88  |                        |
| 759.387920543106 | 7614.098, | 14.05 | b7-98 (0.00)           |
| 811.375439993199 | 1334.089, | 2.46  | a7o (0.01)             |
| 818.425751211907 | 3437.215, | 6.34  |                        |
| 828.406202408152 | 6879.253, | 12.69 |                        |
| 846.420647314435 | 6113.353, | 11.28 | b8-98 (0.00)           |
| 848.386937011057 | 2356.613, | 4.34  | y8o (-0.00)            |

Figure S3

|                  |                       |       |               |
|------------------|-----------------------|-------|---------------|
| 866.398150269719 | 4152.22 <sub>1</sub>  | 7.66  | y8 (-0.00)    |
| 963.475573721226 | 623.5931 <sub>1</sub> | 1.15  |               |
| 981.488700599117 | 2068.481 <sub>1</sub> | 3.81  |               |
| 1004.48476856643 | 3130.875 <sub>1</sub> | 5.77  | y9o (-0.00)   |
| 1009.47975410937 | 1465.932 <sub>1</sub> | 2.70  | b9-98 (0.00)  |
| 1022.50002958932 | 14881.49 <sub>1</sub> | 27.46 | y9 (-0.00)    |
| 1092.52186524243 | 1079.839 <sub>1</sub> | 1.99  |               |
| 1110.53151302606 | 1008.215 <sub>1</sub> | 1.86  | b10-98 (0.00) |
| 1123.5300596897  | 1521.007 <sub>1</sub> | 2.80  |               |
| 1141.54436301008 | 14976.99 <sub>1</sub> | 27.63 | y10o (-0.00)  |
| 1159.55888638911 | 42862.47 <sub>1</sub> | 79.09 | y10 (-0.00)   |
| 1169.54410902066 | 3646.388 <sub>1</sub> | 6.72  |               |
| 1185.5681545011  | 1084.941 <sub>1</sub> | 2.00  |               |
| 1237.60320338312 | 685.0226 <sub>1</sub> | 1.26  |               |
| 1254.63099356743 | 696.7817 <sub>1</sub> | 1.28  | y11o (-0.00)  |
| 1272.64291718875 | 3235.923 <sub>1</sub> | 5.97  | y11 (-0.00)   |
| 1282.62189198887 | 893.0173 <sub>1</sub> | 1.64  |               |
| 1295.64500857914 | 1371.536 <sub>1</sub> | 2.53  |               |
| 1298.64028094885 | 592.4398 <sub>1</sub> | 1.09  |               |
| 1306.63082572143 | 1765.065 <sub>1</sub> | 3.25  |               |
| 1313.6700493599  | 7152.337 <sub>1</sub> | 13.19 |               |
| 1323.6539086902  | 8646.836 <sub>1</sub> | 15.95 |               |
| 1341.66428190574 | 54190.61 <sub>1</sub> | 100   |               |

Figure S3

# ProPhosSI MS/MS report

Mass: 559.2409 Charge: 3+

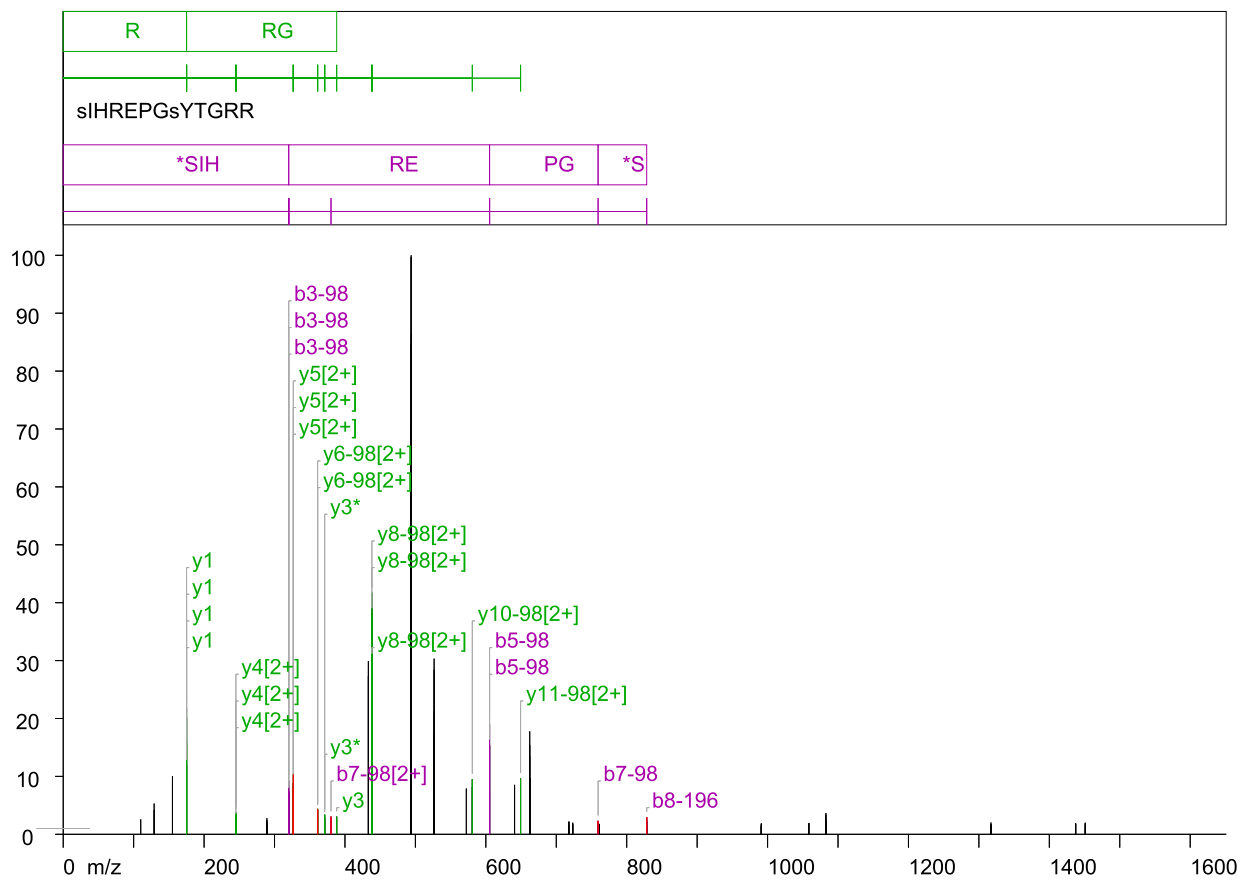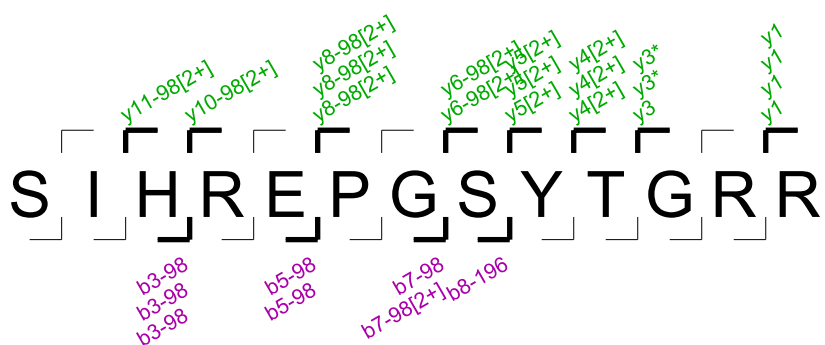

Figure S3

## 5-HT2A

(20) 298 SIHREPGsYTGRR 309 1674.702 (-0.0036) Da

|                         |     |
|-------------------------|-----|
| Parent Ion              | m/z |
| No parent ions observed |     |

### Modifications and supporting evidence

| Position | Residue ID | Modification | Evidence                      |
|----------|------------|--------------|-------------------------------|
| 8        | (305)      | Phospho (ST) | b7-98 => b8-196 : y5 => y6-98 |
| 1        | (298)      | Phospho (ST) |                               |

### Spectrum interpretation

| Rule                                   | passed/tests | Description                                                                                                                                                                                                                                                                                                                                                                                                                                                                                                                                                                                                                                                                                                        |
|----------------------------------------|--------------|--------------------------------------------------------------------------------------------------------------------------------------------------------------------------------------------------------------------------------------------------------------------------------------------------------------------------------------------------------------------------------------------------------------------------------------------------------------------------------------------------------------------------------------------------------------------------------------------------------------------------------------------------------------------------------------------------------------------|
| Parent ions present                    | 0/1          | Parent ions corresponding to the parent fragment - 2 phosphate ions were not found                                                                                                                                                                                                                                                                                                                                                                                                                                                                                                                                                                                                                                 |
| Three -98 Ions present                 | 1/1          | 8 des-phospho fragment ions were found.                                                                                                                                                                                                                                                                                                                                                                                                                                                                                                                                                                                                                                                                            |
| Unique -98 transitions present         | 1/2          | transition b7-98 to b8-196, transition y5 to y6-98 support unique phosphorylation at position 8<br><br/>No transitions found to support unique phosphorylation at position 1<br><br/>                                                                                                                                                                                                                                                                                                                                                                                                                                                                                                                              |
| Four Sequential b or y ions            | 1/1          | Sequence of four y ions found from y3 to y6-98.                                                                                                                                                                                                                                                                                                                                                                                                                                                                                                                                                                                                                                                                    |
| Five of six sequential ions present    | 1/1          | Five of Six ions found between y1 and y6<br>Five of Six ions found between y3 and y8                                                                                                                                                                                                                                                                                                                                                                                                                                                                                                                                                                                                                               |
| Proline directed fragmentation pattern | 2/2          | PASS: y8-98> y7-98<br/><br>PASS: b6-98< b5-98<br/>                                                                                                                                                                                                                                                                                                                                                                                                                                                                                                                                                                                                                                                                 |
| PhosphoTyrosine transition present     | 0/0          | 0 of 0 phosphotyrosine transitions were found.                                                                                                                                                                                                                                                                                                                                                                                                                                                                                                                                                                                                                                                                     |
| Six of top ten ions identified         | 3/6          | ion 1 (mass: 493.949212: intensity: 2973.545898) assigned 0 times<br>ion 2 (mass: 493.89942: intensity: 2963.411133) assigned 0 times<br>ion 3 (mass: 494.2647363: intensity: 2566.40723) assigned 0 times<br>ion 4 (mass: 493.9160165: intensity: 2520.39063) assigned 0 times<br>ion 5 (mass: 494.2481222: intensity: 2501.13281) assigned 0 times<br>ion 6 (mass: 493.9326139: intensity: 2097.53125) assigned 0 times<br>ion 7 (mass: 438.2230308: intensity: 1240.870117) assigned 1 times<br>ion 8 (mass: 438.2369016: intensity: 1133.389526) assigned 1 times<br>ion 9 (mass: 526.5882446: intensity: 902.3140869) assigned 0 times<br>ion 10 (mass: 438.2091607: intensity: 899.5979004) assigned 1 times |

### Ion Table

28 ions assigned of 70 ions above threshold (40%).

#### N-terminal ions

| AA | N-ion | b       | b*      | b-196 | b-98                                                           | bo      |
|----|-------|---------|---------|-------|----------------------------------------------------------------|---------|
| s  | 1     | 168.006 | 150.979 | -     | 70.020                                                         | 149.995 |
| l  | 2     | 281.090 | 264.063 | -     | 183.104                                                        | 263.079 |
| H  | 3     | 418.149 | 401.122 | -     | 320.163<br>320.1709319 (9)<br>320.16227 (7)<br>320.1795941 (7) | 400.138 |

Figure S3

|   |    |          |          |                            |                                                    |          |
|---|----|----------|----------|----------------------------|----------------------------------------------------|----------|
| R | 4  | 574.250  | 557.223  | -                          | 476.264                                            | 556.239  |
| E | 5  | 703.292  | 686.266  | -                          | 605.306<br>605.2920684 (15)<br>605.3145852 (18)    | 685.282  |
| P | 6  | 800.345  | 783.319  | -                          | 702.359                                            | 782.335  |
| G | 7  | 857.367  | 840.340  | -                          | 759.381<br>759.3878605 (2)<br>380.1943357 [2+] (3) | 839.356  |
| s | 8  | 1024.365 | 1007.338 | 828.393<br>828.4035732 (2) | 926.379                                            | 1006.354 |
| Y | 9  | 1187.428 | 1170.402 | 991.456                    | 1089.442                                           | 1169.418 |
| T | 10 | 1288.476 | 1271.449 | 1092.504                   | 1190.490                                           | 1270.465 |
| G | 11 | 1345.497 | 1328.471 | 1149.526                   | 1247.512                                           | 1327.487 |
| R | 12 | 1501.599 | 1484.572 | 1305.627                   | 1403.613                                           | 1483.588 |
| R | 13 | -        | -        | -                          | -                                                  | -        |

### C-terminal ions

| AA | C-ion | y                                                                                       | y*                                              | y-98                                                                               | y0       |
|----|-------|-----------------------------------------------------------------------------------------|-------------------------------------------------|------------------------------------------------------------------------------------|----------|
| s  | 13    | -                                                                                       | -                                               | -                                                                                  | -        |
| I  | 12    | 1508.712                                                                                | 1491.685                                        | 1410.726                                                                           | 1490.701 |
| H  | 11    | 1395.628                                                                                | 1378.601                                        | 1297.642<br>649.3251225 [2+] (9)                                                   | 1377.617 |
| R  | 10    | 1258.569                                                                                | 1241.542                                        | 1160.583<br>580.7982526 [2+] (9)                                                   | 1240.558 |
| E  | 9     | 1102.468                                                                                | 1085.441                                        | 1004.482                                                                           | 1084.457 |
| P  | 8     | 973.425                                                                                 | 956.399                                         | 875.439<br>438.2230308 [2+] (41)<br>438.2369016 [2+] (38)<br>438.2091607 [2+] (30) | 955.415  |
| G  | 7     | 876.372                                                                                 | 859.346                                         | 778.387                                                                            | 858.362  |
| s  | 6     | 819.351                                                                                 | 802.324                                         | 721.365<br>361.1882224 [2+] (4)<br>361.1986015 [2+] (4)                            | 801.340  |
| Y  | 5     | 652.353<br>326.6694658 [2+] (7)<br>326.6873207 [2+] (8)<br>326.6783931 [2+] (10)        | 635.326                                         | -                                                                                  | 634.342  |
| T  | 4     | 489.289<br>245.1466714 [2+] (3)<br>245.140868 [2+] (2)<br>245.1524749 [2+] (3)          | 472.263                                         | -                                                                                  | 471.279  |
| G  | 3     | 388.242<br>388.2445281 (3)                                                              | 371.215<br>*371.2104351 (3)<br>*371.2212491 (2) | -                                                                                  | 370.231  |
| R  | 2     | 331.220                                                                                 | 314.194                                         | -                                                                                  | 313.210  |
| R  | 1     | 175.119<br>175.1175357 (21)<br>175.1140319 (15)<br>175.1245436 (11)<br>175.1210396 (20) | 158.092                                         | -                                                                                  | 157.108  |

### Ion distribution

| Threshold | Ion count | Matches | % matched |
|-----------|-----------|---------|-----------|
| 0         | 100       | 31      | 31        |
| 0.5       | 100       | 31      | 31        |
| 1         | 94        | 29      | 30        |

Figure S3

|    |    |    |    |
|----|----|----|----|
| 2  | 70 | 28 | 40 |
| 3  | 54 | 24 | 44 |
| 4  | 47 | 19 | 40 |
| 5  | 44 | 17 | 38 |
| 10 | 30 | 10 | 33 |

### Observed ions > 1%

| m/z         | Intensity   | % max | Assignment (delta)       |
|-------------|-------------|-------|--------------------------|
| 110.0726142 | 76.84295654 | 2.58  |                          |
| 129.099488  | 124.7159424 | 4.19  |                          |
| 129.1017059 | 158.1997528 | 5.32  |                          |
| 155.1166758 | 299.0040894 | 10.05 |                          |
| 155.1195969 | 270.3562927 | 9.09  |                          |
| 175.1140319 | 470.1944275 | 15.81 | y1 (-0.00)               |
| 175.1175357 | 651.4014893 | 21.90 | y1 (-0.00)               |
| 175.1210396 | 599.161438  | 20.14 | y1 (0.00)                |
| 175.1245436 | 355.9265747 | 11.96 | y1 (0.00)                |
| 245.140868  | 78.25357056 | 2.63  | y4[2+] (-0.00)           |
| 245.1466714 | 114.6404724 | 3.85  | y4[2+] (-0.00)           |
| 245.1524749 | 103.7242126 | 3.48  | y4[2+] (0.00)            |
| 245.1582787 | 57.135746   | 1.92  | y4[2+] (0.00)            |
| 289.1533527 | 62.05736923 | 2.08  |                          |
| 289.1607872 | 82.65490723 | 2.77  |                          |
| 289.1682219 | 72.44944763 | 2.43  |                          |
| 320.16227   | 210.6694946 | 7.08  | b3-98 (-0.00)            |
| 320.1709319 | 275.2634888 | 9.25  | b3-98 (0.00)             |
| 320.1795941 | 222.7120972 | 7.48  | b3-98 (0.01)             |
| 326.6694658 | 236.5240021 | 7.95  | y5[2+] (-0.01)           |
| 326.6783931 | 307.4874268 | 10.34 | y5[2+] (-0.00)           |
| 326.6873207 | 263.0691528 | 8.84  | y5[2+] (0.00)            |
| 361.1882224 | 130.5734253 | 4.39  | y6-98[2+] (0.00)         |
| 361.1986015 | 122.6739655 | 4.12  | y6-98[2+] (0.01)         |
| 371.2104351 | 100.7621002 | 3.38  | y3* (-0.00) : z3 (-0.00) |
| 371.2212491 | 86.91004944 | 2.92  | y3* (0.00) : z3 (0.00)   |
| 380.1943357 | 90.4498291  | 3.04  | b7-98[2+] (-0.00)        |
| 388.2445281 | 91.05412292 | 3.06  | y3 (0.00)                |
| 433.2174815 | 889.463501  | 29.91 |                          |
| 433.2311153 | 813.2438965 | 27.34 |                          |
| 438.2091607 | 899.5979004 | 30.25 | y8-98[2+] (-0.01)        |
| 438.2230308 | 1240.870117 | 41.73 | y8-98[2+] (-0.00)        |
| 438.2369016 | 1133.389526 | 38.11 | y8-98[2+] (0.01)         |
| 438.250773  | 670.756958  | 22.55 |                          |

Figure S3



|             |              |       |                   |
|-------------|--------------|-------|-------------------|
| 493.89942   | 2963.411133, | 99.65 |                   |
| 493.9160165 | 2520.39063,  | 84.76 |                   |
| 493.9326139 | 2097.53125,  | 70.53 |                   |
| 493.949212  | 2973.545898, | 100   |                   |
| 494.2481222 | 2501.13281,  | 84.11 |                   |
| 494.2647363 | 2566.40723,  | 86.30 |                   |
| 526.5517052 | 512.7440796, | 17.24 |                   |
| 526.5699744 | 844.5879517, | 28.40 |                   |
| 526.5882446 | 902.3140869, | 30.34 |                   |
| 526.6065158 | 634.8270264, | 21.34 |                   |
| 526.8989835 | 515.4677124, | 17.33 |                   |
| 526.9172708 | 603.3769531, | 20.29 |                   |
| 572.2796124 | 235.4198151, | 7.91  |                   |
| 580.7982526 | 283.2157898, | 9.52  | y10-98[2+] (0.00) |
| 580.8194166 | 241.5894318, | 8.12  |                   |
| 605.2695528 | 231.6360626, | 7.78  |                   |
| 605.2920684 | 459.3583069, | 15.44 | b5-98 (-0.01)     |
| 605.3145852 | 564.5996704, | 18.98 | b5-98 (0.00)      |
| 605.3371033 | 456.4438171, | 15.35 |                   |
| 640.8284828 | 254.0968781, | 8.54  |                   |
| 649.3251225 | 286.9752197, | 9.65  | y11-98[2+] (7.49) |
| 662.3002543 | 402.8986511, | 13.54 |                   |
| 662.326026  | 528.7164307, | 17.78 |                   |
| 662.3517992 | 459.2440186, | 15.44 |                   |
| 662.8417757 | 288.0767517, | 9.68  |                   |
| 717.886156  | 47.35419083, | 1.59  |                   |
| 717.9152393 | 65.20471191, | 2.19  |                   |
| 717.9443244 | 64.6086731,  | 2.17  |                   |
| 723.326217  | 48.87817001, | 1.64  |                   |
| 723.3556316 | 59.82880783, | 2.01  |                   |
| 723.3850479 | 55.20959091, | 1.85  |                   |
| 759.356221  | 45.51073074, | 1.53  |                   |
| 759.3878605 | 68.92932129, | 2.31  | b7-98 (0.00)      |
| 759.419502  | 62.04956436, | 2.08  |                   |
| 760.9406217 | 44.62907028, | 1.50  |                   |
| 760.9723603 | 53.5132103,  | 1.79  |                   |
| 761.0041009 | 52.21364975, | 1.75  |                   |
| 828.331477  | 30.37163162, | 1.02  |                   |
| 828.3675239 | 70.32487488, | 2.36  |                   |
| 828.4035732 | 88.03901672, | 2.96  | b8-196 (0.00)     |
| 828.4396248 | 65.00915527, | 2.18  |                   |
| 990.9978802 | 40.59950256, | 1.36  |                   |
| 991.0450509 | 51.90354538, | 1.74  |                   |

Figure S3

|             |              |      |  |
|-------------|--------------|------|--|
| 991.0922249 | 56.95181656, | 1.91 |  |
| 991.1394024 | 48.40657425, | 1.62 |  |
| 1058.610518 | 56.72603226, | 1.90 |  |
| 1058.662598 | 57.70243454, | 1.94 |  |
| 1082.709669 | 55.91621017, | 1.88 |  |
| 1082.763537 | 100.2455444, | 3.37 |  |
| 1082.817409 | 109.0979156, | 3.66 |  |
| 1082.871285 | 75.09506226, | 2.52 |  |
| 1317.0936   | 46.05416489, | 1.54 |  |
| 1317.165875 | 60.63010788, | 2.03 |  |
| 1317.238156 | 52.68044662, | 1.77 |  |
| 1437.26618  | 54.32481766, | 1.82 |  |
| 1437.348569 | 57.98490524, | 1.95 |  |
| 1437.430966 | 52.94816208, | 1.78 |  |
| 1450.95691  | 49.26804733, | 1.65 |  |
| 1451.040479 | 59.09872818, | 1.98 |  |
| 1451.124056 | 58.75348282, | 1.97 |  |

Figure S3

# ProPhosSI MS/MS report

Mass: 904.4283 Charge: 2+

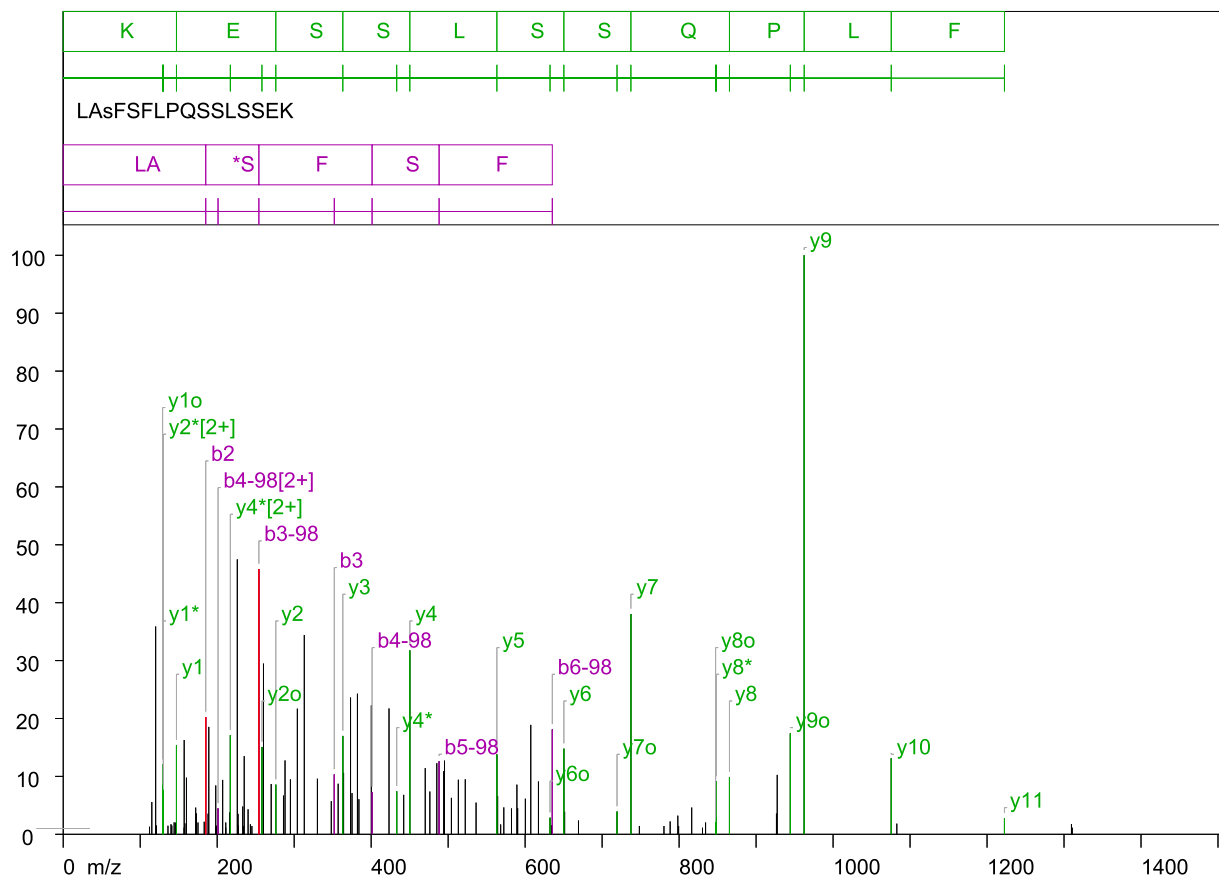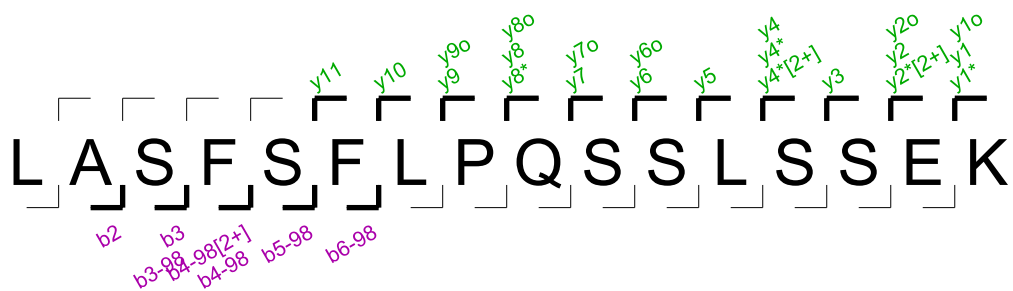

Figure S3

## 5-HT2A

(44) 278 LAsFSFLPQSSLSSEK 293 1806.844 (-0.0031) Da

|                         |     |
|-------------------------|-----|
| Parent Ion              | m/z |
| No parent ions observed |     |

### Modifications and supporting evidence

| Position | Residue ID | Modification | Evidence    |
|----------|------------|--------------|-------------|
| 3        | (280)      | Phospho (ST) | b2 => b3-98 |

### Spectrum interpretation

| Rule                                   | passed/tests | Description                                                                                                                                                                                                                                                                                                                                                                                                                                                                                                                                                                                                                                                                                                                                |
|----------------------------------------|--------------|--------------------------------------------------------------------------------------------------------------------------------------------------------------------------------------------------------------------------------------------------------------------------------------------------------------------------------------------------------------------------------------------------------------------------------------------------------------------------------------------------------------------------------------------------------------------------------------------------------------------------------------------------------------------------------------------------------------------------------------------|
| Parent ions present                    | 0/1          | Parent ions corresponding to the parent fragment - 1 phosphate ions were not found                                                                                                                                                                                                                                                                                                                                                                                                                                                                                                                                                                                                                                                         |
| Three -98 Ions present                 | 1/1          | 4 des-phospho fragment ions were found.                                                                                                                                                                                                                                                                                                                                                                                                                                                                                                                                                                                                                                                                                                    |
| Unique -98 transitions present         | 1/1          | transition b2 to b3-98 support unique phosphorylation at position 3<br><br/>                                                                                                                                                                                                                                                                                                                                                                                                                                                                                                                                                                                                                                                               |
| Four Sequential b or y ions            | 1/1          | Sequence of four b ions found from b2 to b5-98.<br>Sequence of four y ions found from y1 to y4.                                                                                                                                                                                                                                                                                                                                                                                                                                                                                                                                                                                                                                            |
| Five of six sequential ions present    | 1/1          | Five of Six ions found between b1 and b6<br>Five of Six ions found between b2 and b7<br>Five of Six ions found between y0 and y5<br>Five of Six ions found between y1 and y6<br>Five of Six ions found between y2 and y7<br>Five of Six ions found between y3 and y8<br>Five of Six ions found between y4 and y9<br>Five of Six ions found between y5 and y10<br>Five of Six ions found between y6 and y11<br>Five of Six ions found between y7 and y12                                                                                                                                                                                                                                                                                    |
| Proline directed fragmentation pattern | 1/1          | PASS: y9> y8 with ratio 10.1<br/><br>No proline ions at b8-98<br/>                                                                                                                                                                                                                                                                                                                                                                                                                                                                                                                                                                                                                                                                         |
| PhosphoTyrosine transition present     | 0/0          | 0 of 0 phosphotyrosine transitions were found.                                                                                                                                                                                                                                                                                                                                                                                                                                                                                                                                                                                                                                                                                             |
| Six of top ten ions identified         | 4/6          | ion 1 (mass: 962.479236133074: intensity: 41396.28) assigned 1 times<br>ion 2 (mass: 226.118906761395: intensity: 19660.8) assigned 0 times<br>ion 3 (mass: 254.150357835796: intensity: 18965.04) assigned 1 times<br>ion 4 (mass: 737.368075744833: intensity: 15750.32) assigned 1 times<br>ion 5 (mass: 120.080898579207: intensity: 14860.93) assigned 0 times<br>ion 6 (mass: 313.15124289743: intensity: 14249.74) assigned 0 times<br>ion 7 (mass: 450.218905106955: intensity: 13146.76) assigned 1 times<br>ion 8 (mass: 260.139768464907: intensity: 12207.13) assigned 0 times<br>ion 9 (mass: 382.173439588294: intensity: 10051.92) assigned 0 times<br>ion 10 (mass: 373.223858383509: intensity: 9780.26) assigned 0 times |

### Ion Table

34 ions assigned of 92 ions above threshold (36%).

Figure S3

### N-terminal ions

| AA | N-ion | b                                | b*       | b-98                                                        | bo       |
|----|-------|----------------------------------|----------|-------------------------------------------------------------|----------|
| L  | 1     | 114.091                          | 97.065   | -                                                           | 96.081   |
| A  | 2     | 185.129<br>185.128732413761 (20) | 168.102  | -                                                           | 167.118  |
| s  | 3     | 352.127<br>352.127247512411 (10) | 335.100  | 254.141<br>254.150357835796 (45)                            | 334.116  |
| F  | 4     | 499.195                          | 482.169  | 401.209<br>201.123786059486 [2+] (4)<br>401.21802852119 (7) | 481.185  |
| S  | 5     | 586.227                          | 569.201  | 488.241<br>488.250423464514 (12)                            | 568.217  |
| F  | 6     | 733.296                          | 716.269  | 635.310<br>635.320227763599 (18)                            | 715.285  |
| L  | 7     | 846.380                          | 829.353  | 748.394                                                     | 828.369  |
| P  | 8     | 943.433                          | 926.406  | 845.447                                                     | 925.422  |
| Q  | 9     | 1071.491                         | 1054.465 | 973.505                                                     | 1053.481 |
| S  | 10    | 1158.523                         | 1141.497 | 1060.537                                                    | 1140.513 |
| S  | 11    | 1245.555                         | 1228.529 | 1147.569                                                    | 1227.545 |
| L  | 12    | 1358.639                         | 1341.613 | 1260.653                                                    | 1340.629 |
| S  | 13    | 1445.671                         | 1428.645 | 1347.685                                                    | 1427.661 |
| S  | 14    | 1532.703                         | 1515.677 | 1434.717                                                    | 1514.693 |
| E  | 15    | 1661.746                         | 1644.719 | 1563.760                                                    | 1643.735 |
| K  | 16    | -                                | -        | -                                                           | -        |

### C-terminal ions

| AA | C-ion | y                                 | y*                                                              | y-98     | yo                               |
|----|-------|-----------------------------------|-----------------------------------------------------------------|----------|----------------------------------|
| L  | 16    | -                                 | -                                                               | -        | -                                |
| A  | 15    | 1694.767                          | 1677.741                                                        | 1596.781 | 1676.757                         |
| s  | 14    | 1623.730                          | 1606.704                                                        | 1525.744 | 1605.720                         |
| F  | 13    | 1456.732                          | 1439.705                                                        | -        | 1438.721                         |
| S  | 12    | 1309.664                          | 1292.637                                                        | -        | 1291.653                         |
| F  | 11    | 1222.631<br>1222.63148437197 (2)  | 1205.605                                                        | -        | 1204.621                         |
| L  | 10    | 1075.563<br>1075.56115253088 (13) | 1058.537                                                        | -        | 1057.553                         |
| P  | 9     | 962.479<br>962.479236133074 (100) | 945.452                                                         | -        | 944.468<br>944.46700169931 (17)  |
| Q  | 8     | 865.426<br>865.427795988115 (9)   | 848.400<br>*848.402679647264 (9)                                | -        | 847.416<br>847.413299677502 (2)  |
| S  | 7     | 737.368<br>737.368075744833 (38)  | 720.341                                                         | -        | 719.357<br>719.360607764844 (3)  |
| S  | 6     | 650.336<br>650.336620591607 (14)  | 633.309                                                         | -        | 632.325<br>632.325871241278 (2)  |
| L  | 5     | 563.304<br>563.304327461494 (13)  | 546.277                                                         | -        | 545.293                          |
| S  | 4     | 450.220<br>450.218905106955 (31)  | 433.193<br>*217.097138629192 [2+] (17)<br>*433.186051802783 (7) | -        | 432.209                          |
| S  | 3     | 363.187<br>363.187643261989 (16)  | 346.161                                                         | -        | 345.177                          |
| E  | 2     | 276.155<br>276.154367521989 (8)   | 259.129<br>*130.086280806094 [2+] (7)                           | -        | 258.145<br>258.143165424161 (15) |
| K  | 1     | 147.113                           | 130.086                                                         | -        | 129.102                          |

Figure S3

|   |   |                       |                       |   |                       |
|---|---|-----------------------|-----------------------|---|-----------------------|
| - | - | 147.112957223734 (15) | *130.086280806094 (7) | - | 129.102435870568 (12) |
|---|---|-----------------------|-----------------------|---|-----------------------|

### Ion distribution

| Threshold | Ion count | Matches | % matched |
|-----------|-----------|---------|-----------|
| 0         | 136       | 37      | 27        |
| 0.5       | 136       | 37      | 27        |
| 1         | 116       | 36      | 31        |
| 2         | 92        | 34      | 36        |
| 3         | 81        | 30      | 37        |
| 4         | 73        | 29      | 39        |
| 5         | 65        | 28      | 43        |
| 10        | 37        | 19      | 51        |

### Observed ions > 1%

| m/z              | Intensity             | % max | Assignment (delta)                                        |
|------------------|-----------------------|-------|-----------------------------------------------------------|
| 112.110808362555 | 541.58 <sub>3</sub>   | 1.30  |                                                           |
| 115.086712554077 | 2306.057 <sub>3</sub> | 5.57  |                                                           |
| 120.080898579207 | 14860.93 <sub>3</sub> | 35.89 |                                                           |
| 121.084623422422 | 629.936 <sub>3</sub>  | 1.52  |                                                           |
| 129.066510039428 | 444.5616 <sub>3</sub> | 1.07  |                                                           |
| 129.102435870568 | 4978.855 <sub>3</sub> | 12.02 | y1o (-0.00)                                               |
| 130.086280806094 | 3168.582 <sub>3</sub> | 7.65  | y2*[2+] (0.01) : z2[2+] (0.01) : y1* (-0.00) : z1 (-0.00) |
| 136.076156566285 | 611.2229 <sub>3</sub> | 1.47  |                                                           |
| 140.010370053276 | 720.9639 <sub>3</sub> | 1.74  |                                                           |
| 141.065567135597 | 621.9658 <sub>3</sub> | 1.50  |                                                           |
| 144.080913518304 | 855.5474 <sub>3</sub> | 2.06  |                                                           |
| 146.09638580999  | 834.8638 <sub>3</sub> | 2.01  |                                                           |
| 147.112957223734 | 6355.815 <sub>3</sub> | 15.35 | y1 (-0.00)                                                |
| 157.060872712379 | 479.7785 <sub>3</sub> | 1.15  |                                                           |
| 157.133768772855 | 6742.691 <sub>3</sub> | 16.28 | a2 (-0.00)                                                |
| 158.092110397658 | 780.9307 <sub>3</sub> | 1.88  |                                                           |
| 160.075831980548 | 4051.067 <sub>3</sub> | 9.78  |                                                           |
| 172.076216744924 | 1909.849 <sub>3</sub> | 4.61  |                                                           |
| 173.128726921804 | 1488.069 <sub>3</sub> | 3.59  |                                                           |
| 175.070830781504 | 844.8469 <sub>3</sub> | 2.04  |                                                           |
| 183.149854566158 | 895.7849 <sub>3</sub> | 2.16  |                                                           |
| 185.128732413761 | 8384.55 <sub>3</sub>  | 20.25 | b2 (-0.00)                                                |
| 188.143612345075 | 1472.827 <sub>3</sub> | 3.55  |                                                           |
| 189.102507707806 | 7677.758 <sub>3</sub> | 18.54 |                                                           |
| 198.088442792378 | 538.8403 <sub>3</sub> | 1.30  |                                                           |
| 198.124028764484 | 3493.08 <sub>3</sub>  | 8.43  |                                                           |
| 199.072219204723 | 610.2178 <sub>3</sub> | 1.47  |                                                           |

Figure S3

|                  |           |       |                                  |
|------------------|-----------|-------|----------------------------------|
| 201.123786059486 | 1850.89,  | 4.47  | b4-98[2+] (0.01)                 |
| 207.113277642125 | 3889.098, | 9.39  |                                  |
| 211.10805171564  | 478.2105, | 1.15  |                                  |
| 211.14469316499  | 844.5006, | 2.04  |                                  |
| 216.098635163389 | 1558.116, | 3.76  |                                  |
| 217.097138629192 | 7088.592, | 17.12 | y4*[2+] (-0.00) : z4[2+] (-0.00) |
| 226.118906761395 | 19660.8,  | 47.49 |                                  |
| 227.124530800424 | 1464.621, | 3.53  |                                  |
| 227.172883839368 | 645.4805, | 1.55  |                                  |
| 233.164766399286 | 1986.596, | 4.79  |                                  |
| 234.124702086647 | 583.6202, | 1.40  |                                  |
| 235.107954215908 | 5590.154, | 13.50 |                                  |
| 240.134933276472 | 1786.425, | 4.31  |                                  |
| 243.148074226397 | 714.5485, | 1.72  |                                  |
| 245.093267958584 | 590.4103, | 1.42  |                                  |
| 254.150357835796 | 18965.04, | 45.81 | b3-98 (0.00)                     |
| 258.143165424161 | 6241.207, | 15.07 | y2o (-0.00)                      |
| 260.139768464907 | 12207.13, | 29.48 |                                  |
| 270.14462141072  | 3594.362, | 8.68  |                                  |
| 276.154367521989 | 3546.055, | 8.56  | y2 (-0.00)                       |
| 286.120673241642 | 2767.427, | 6.68  |                                  |
| 288.136441174643 | 5280.99,  | 12.75 |                                  |
| 295.140833086247 | 3928.224, | 9.48  |                                  |
| 304.131834731903 | 8983.082, | 21.70 | x2 (-0.01)                       |
| 313.15124289743  | 14249.74, | 34.42 |                                  |
| 330.182833919203 | 3974.479, | 9.60  |                                  |
| 348.194215721447 | 2368.065, | 5.72  |                                  |
| 352.127247512411 | 4275.81,  | 10.32 | b3 (-9.74)                       |
| 357.15416143806  | 3614.713, | 8.73  |                                  |
| 363.187643261989 | 7032.785, | 16.98 | y3 (-0.00)                       |
| 364.163304208729 | 4389.09,  | 10.60 |                                  |
| 373.223858383509 | 9780.26,  | 23.62 |                                  |
| 375.16249594876  | 2947.318, | 7.11  |                                  |
| 382.173439588294 | 10051.92, | 24.28 |                                  |
| 384.096383075743 | 2508.972, | 6.06  |                                  |
| 400.183223205291 | 9218.771, | 22.26 |                                  |
| 401.21802852119  | 3021.007, | 7.29  | b4-98 (0.00)                     |
| 423.203610080163 | 8997.795, | 21.73 |                                  |
| 433.186051802783 | 3072.227, | 7.42  | y4* (-0.00) : z4 (-0.00)         |
| 442.245156095451 | 2819.474, | 6.81  |                                  |
| 450.218905106955 | 13146.76, | 31.75 | y4 (-0.00)                       |
| 470.239424666205 | 4731.826, | 11.43 |                                  |
| 476.231238906203 | 3058.477, | 7.38  |                                  |

Figure S3

|                  |           |       |                        |
|------------------|-----------|-------|------------------------|
| 485.274548856679 | 5085.367, | 12.28 |                        |
| 488.250423464514 | 5218.591, | 12.60 | b5-98 (0.00)           |
| 494.23986990931  | 4516.383, | 10.91 |                        |
| 495.257154657915 | 5266.945, | 12.72 |                        |
| 504.224660917366 | 2604.886, | 6.29  |                        |
| 513.266709928954 | 3901.369, | 9.42  | a9o[2+] (0.01)         |
| 522.233981440114 | 3935.494, | 9.50  | a9[2+] (-0.01)         |
| 536.287814920022 | 2265.333, | 5.47  |                        |
| 563.304327461494 | 5713.876, | 13.80 | y5 (0.00)              |
| 564.271376100074 | 2732.356, | 6.60  |                        |
| 568.216919058501 | 704.8585, | 1.70  | b5o (-0.00)            |
| 572.292189974785 | 1922.463, | 4.64  |                        |
| 582.289720061945 | 1846.304, | 4.46  |                        |
| 589.311796282809 | 3550.618, | 8.57  |                        |
| 590.302385353407 | 1861.027, | 4.49  |                        |
| 600.298214182075 | 2544.852, | 6.14  | a11o[2+] (0.01)        |
| 607.325291949869 | 7822.735, | 18.89 |                        |
| 617.309379222844 | 3775.55,  | 9.12  |                        |
| 632.325871241278 | 1184.104, | 2.86  | y6o (0.00)             |
| 634.29101345958  | 637.8583, | 1.54  |                        |
| 635.320227763599 | 7497.377, | 18.11 | b6-98 (0.00)           |
| 650.336620591607 | 6120.709, | 14.78 | y6 (0.00)              |
| 651.304649632059 | 1607.844, | 3.88  |                        |
| 669.322766628333 | 986.433,  | 2.38  | x12[2+] (-0.01)        |
| 719.360607764844 | 1625.92,  | 3.92  | y7o (0.00)             |
| 737.368075744833 | 15750.32, | 38.04 | y7 (-6.92)             |
| 748.410003894712 | 594.2305, | 1.43  | b7-98 (0.01)           |
| 780.355596319013 | 592.1029, | 1.43  |                        |
| 788.385255082495 | 920.7234, | 2.22  |                        |
| 798.364969282095 | 1333.587, | 3.22  |                        |
| 799.35576493776  | 580.4562, | 1.40  |                        |
| 816.373928614576 | 1913.229, | 4.62  |                        |
| 830.393392541607 | 468.3553, | 1.13  |                        |
| 834.396268679503 | 841.9946, | 2.03  |                        |
| 847.413299677502 | 862.1363, | 2.08  | y8o (-0.00)            |
| 848.402679647264 | 3774.62,  | 9.11  | y8* (0.00) : z8 (0.00) |
| 865.427795988115 | 4095.613, | 9.89  | y8 (0.00)              |
| 926.452747792427 | 1479.787, | 3.57  |                        |
| 927.446267731064 | 4247.418, | 10.26 |                        |
| 944.46700169931  | 7215.603, | 17.43 | y9o (-0.00)            |
| 962.479236133074 | 41396.28, | 100   | y9 (-0.00)             |
| 1075.56115253088 | 5434.923, | 13.12 | y10 (-0.00)            |
| 1082.80616182065 | 762.7844, | 1.84  |                        |

Figure S3



|                  |           |      |             |
|------------------|-----------|------|-------------|
| 1222.63148437197 | 1134.231, | 2.73 | y11 (-0.00) |
| 1309.64238422237 | 732.9919, | 1.77 |             |
| 1310.66326868999 | 471.8918, | 1.13 |             |

Figure S3

# ProPhosSI MS/MS report

Mass: 811.3813 Charge: 3+

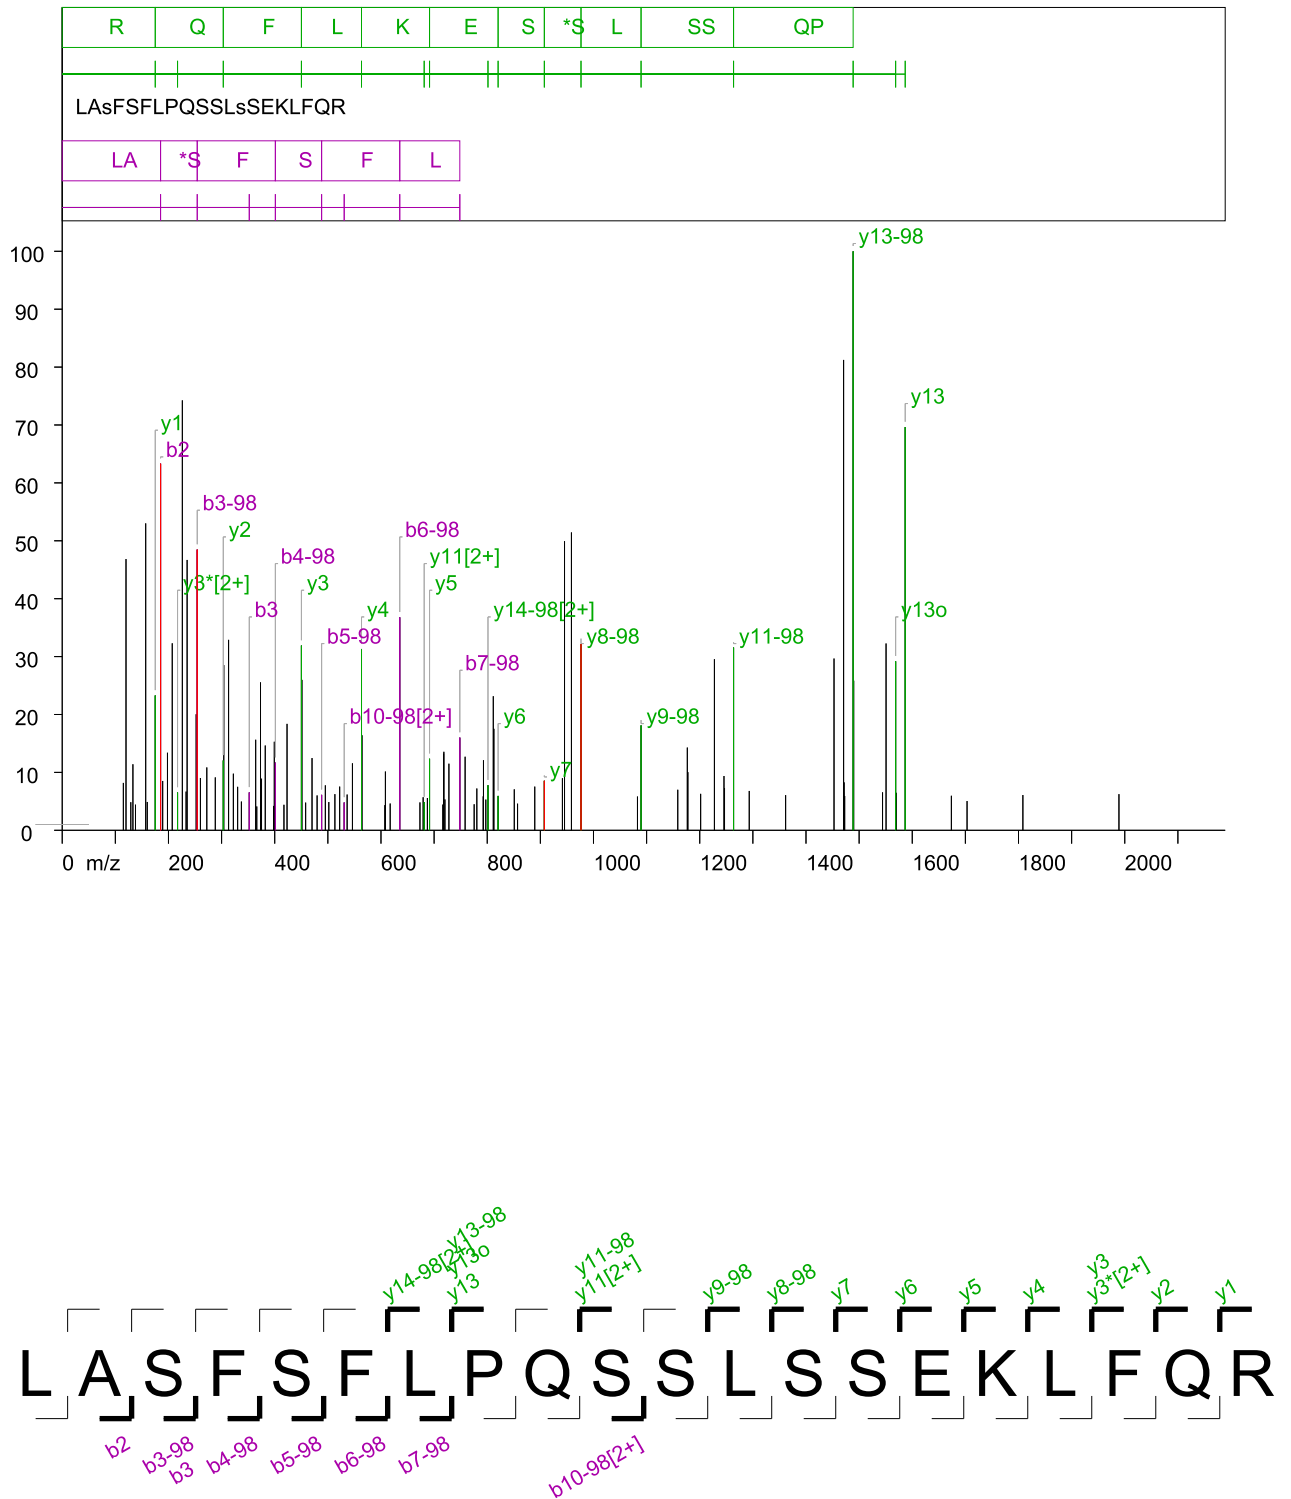

Figure S3

## 5-HT2A

(25) 278 LAsFSFLPQSSLsSEKLFQR 297 2431.122 (-0.0021) Da

|                         |     |
|-------------------------|-----|
| Parent Ion              | m/z |
| No parent ions observed |     |

### Modifications and supporting evidence

| Position | Residue ID | Modification | Evidence    |
|----------|------------|--------------|-------------|
| 3        | (280)      | Phospho (ST) | b2 => b3-98 |
| 13       | (290)      | Phospho (ST) | y7 => y8-98 |

### Spectrum interpretation

| Rule                                   | passed/tests | Description                                                                                                                                                                                                                                                                                                                                                                                                                                                                                                                                                                                                                                                                                                                                 |
|----------------------------------------|--------------|---------------------------------------------------------------------------------------------------------------------------------------------------------------------------------------------------------------------------------------------------------------------------------------------------------------------------------------------------------------------------------------------------------------------------------------------------------------------------------------------------------------------------------------------------------------------------------------------------------------------------------------------------------------------------------------------------------------------------------------------|
| Parent ions present                    | 0/1          | Parent ions corresponding to the parent fragment - 2 phosphate ions were not found                                                                                                                                                                                                                                                                                                                                                                                                                                                                                                                                                                                                                                                          |
| Three -98 Ions present                 | 1/1          | 11 des-phospho fragment ions were found.                                                                                                                                                                                                                                                                                                                                                                                                                                                                                                                                                                                                                                                                                                    |
| Unique -98 transitions present         | 2/2          | transition b2 to b3-98 support unique phosphorylation at position 3<br><br/>transition y7 to y8-98 support unique phosphorylation at position 13<br><br/>                                                                                                                                                                                                                                                                                                                                                                                                                                                                                                                                                                                   |
| Four Sequential b or y ions            | 1/1          | Sequence of four b ions found from b2 to b5-98.<br>Sequence of four y ions found from y1 to y4.                                                                                                                                                                                                                                                                                                                                                                                                                                                                                                                                                                                                                                             |
| Five of six sequential ions present    | 1/1          | Five of Six ions found between b1 and b6<br>Five of Six ions found between b2 and b7<br>Five of Six ions found between b3 and b8<br>Five of Six ions found between y0 and y5<br>Five of Six ions found between y1 and y6<br>Five of Six ions found between y2 and y7<br>Five of Six ions found between y3 and y8<br>Five of Six ions found between y4 and y9<br>Five of Six ions found between y5 and y10<br>Five of Six ions found between y6 and y11                                                                                                                                                                                                                                                                                      |
| Proline directed fragmentation pattern | 2/2          | PASS: y13-98> y12-98<br/><br>PASS: b8-98< b7-98<br/>                                                                                                                                                                                                                                                                                                                                                                                                                                                                                                                                                                                                                                                                                        |
| PhosphoTyrosine transition present     | 0/0          | 0 of 0 phosphotyrosine transitions were found.                                                                                                                                                                                                                                                                                                                                                                                                                                                                                                                                                                                                                                                                                              |
| Six of top ten ions identified         | 5/6          | ion 1 (mass: 1488.77389764326: intensity: 2989.639) assigned 1 times<br>ion 2 (mass: 1470.76517456316: intensity: 2428.688) assigned 0 times<br>ion 3 (mass: 226.118445106373: intensity: 2219.913) assigned 0 times<br>ion 4 (mass: 1586.7561430589: intensity: 2082.125) assigned 1 times<br>ion 5 (mass: 185.128330521536: intensity: 1892.978) assigned 1 times<br>ion 6 (mass: 157.133575744062: intensity: 1584.816) assigned 1 times<br>ion 7 (mass: 958.508435569047: intensity: 1537.952) assigned 0 times<br>ion 8 (mass: 945.509676448229: intensity: 1492.796) assigned 0 times<br>ion 9 (mass: 254.149773843174: intensity: 1449.208) assigned 1 times<br>ion 10 (mass: 120.080668708344: intensity: 1400.47) assigned 0 times |

Figure S3

## Ion Table

27 ions assigned of 114 ions above threshold (23%).

### N-terminal ions

| AA | N-ion | b                                | b*       | b-196    | b-98                                 | bo       |
|----|-------|----------------------------------|----------|----------|--------------------------------------|----------|
| L  | 1     | 114.091                          | 97.065   | -        | -                                    | 96.081   |
| A  | 2     | 185.129<br>185.128330521536 (63) | 168.102  | -        | -                                    | 167.118  |
| s  | 3     | 352.127<br>352.127391867676 (6)  | 335.100  | -        | 254.141<br>254.149773843174 (48)     | 334.116  |
| F  | 4     | 499.195                          | 482.169  | -        | 401.209<br>401.216305119661 (11)     | 481.185  |
| S  | 5     | 586.227                          | 569.201  | -        | 488.241<br>488.255690256077 (6)      | 568.217  |
| F  | 6     | 733.296                          | 716.269  | -        | 635.310<br>635.318824691056 (36)     | 715.285  |
| L  | 7     | 846.380                          | 829.353  | -        | 748.394<br>748.399418606985 (16)     | 828.369  |
| P  | 8     | 943.433                          | 926.406  | -        | 845.447                              | 925.422  |
| Q  | 9     | 1071.491                         | 1054.465 | -        | 973.505                              | 1053.481 |
| S  | 10    | 1158.523                         | 1141.497 | -        | 1060.537<br>530.76110534525 [2+] (4) | 1140.513 |
| S  | 11    | 1245.555                         | 1228.529 | -        | 1147.569                             | 1227.545 |
| L  | 12    | 1358.639                         | 1341.613 | -        | 1260.653                             | 1340.629 |
| s  | 13    | 1525.638                         | 1508.611 | 1329.666 | 1427.652                             | 1507.627 |
| S  | 14    | 1612.670                         | 1595.643 | 1416.698 | 1514.684                             | 1594.659 |
| E  | 15    | 1741.712                         | 1724.686 | 1545.740 | 1643.726                             | 1723.702 |
| K  | 16    | 1869.807                         | 1852.781 | 1673.835 | 1771.821                             | 1851.797 |
| L  | 17    | 1982.891                         | 1965.865 | 1786.919 | 1884.905                             | 1964.881 |
| F  | 18    | 2129.960                         | 2112.933 | 1933.988 | 2031.974                             | 2111.949 |
| Q  | 19    | 2258.018                         | 2240.992 | 2062.046 | 2160.032                             | 2240.008 |
| R  | 20    | -                                | -        | -        | -                                    | -        |

### C-terminal ions

| AA | C-ion | y                                        | y*       | y-196    | y-98                                     | yo                                   |
|----|-------|------------------------------------------|----------|----------|------------------------------------------|--------------------------------------|
| L  | 20    | -                                        | -        | -        | -                                        | -                                    |
| A  | 19    | 2319.046                                 | 2302.019 | 2123.074 | 2221.060                                 | 2301.035                             |
| s  | 18    | 2248.009                                 | 2230.982 | 2052.037 | 2150.023                                 | 2229.998                             |
| F  | 17    | 2081.010                                 | 2063.984 | -        | 1983.025                                 | 2063.000                             |
| S  | 16    | 1933.942                                 | 1916.915 | -        | 1835.956                                 | 1915.931                             |
| F  | 15    | 1846.910                                 | 1829.883 | -        | 1748.924                                 | 1828.899                             |
| L  | 14    | 1699.842                                 | 1682.815 | -        | 1601.856<br>801.426194157124<br>[2+] (7) | 1681.831                             |
| P  | 13    | 1586.757<br>1586.7561430589 (69)         | 1569.731 | -        | 1488.772<br>1488.77389764326<br>(100)    | 1568.747<br>1568.73886882621<br>(29) |
| Q  | 12    | 1489.705                                 | 1472.678 | -        | 1391.719                                 | 1471.694                             |
| S  | 11    | 1361.646<br>681.309080577769<br>[2+] (4) | 1344.620 | -        | 1263.660<br>1263.67087190437<br>(31)     | 1343.636                             |
| S  | 10    | 1274.614                                 | 1257.588 | -        | 1176.628                                 | 1256.604                             |
| L  | 9     | 1187.582                                 | 1170.556 | -        | 1089.596<br>1089.58419755801             | 1169.572                             |

Figure S3

|   |   |                                     |                                          |   |                                     |          |
|---|---|-------------------------------------|------------------------------------------|---|-------------------------------------|----------|
| - | - | -                                   | -                                        | - | (18)                                | -        |
| s | 8 | 1074.498                            | 1057.471                                 | - | 976.512<br>976.523419150955<br>(32) | 1056.487 |
| S | 7 | 907.500<br>907.5038370039 (8)       | 890.473                                  | - | -                                   | 889.489  |
| E | 6 | 820.468<br>820.463717645503 (5)     | 803.441                                  | - | -                                   | 802.457  |
| K | 5 | 691.425<br>691.421961972494<br>(12) | 674.399                                  | - | -                                   | 673.414  |
| L | 4 | 563.330<br>563.331964890352<br>(31) | 546.304                                  | - | -                                   | 545.320  |
| F | 3 | 450.246<br>450.245545428816<br>(31) | 433.219<br>*217.095389985263<br>[2+] (6) | - | -                                   | 432.235  |
| Q | 2 | 303.178<br>303.176176635407<br>(12) | 286.151                                  | - | -                                   | 285.167  |
| R | 1 | 175.119<br>175.118734586684<br>(23) | 158.092                                  | - | -                                   | 157.108  |

### Ion distribution

| Threshold | Ion count | Matches | % matched |
|-----------|-----------|---------|-----------|
| 0         | 114       | 27      | 23        |
| 0.5       | 114       | 27      | 23        |
| 1         | 114       | 27      | 23        |
| 2         | 114       | 27      | 23        |
| 3         | 114       | 27      | 23        |
| 4         | 114       | 27      | 23        |
| 5         | 97        | 25      | 25        |
| 10        | 53        | 17      | 32        |

### Observed ions > 1%

| m/z              | Intensity             | % max | Assignment (delta)               |
|------------------|-----------------------|-------|----------------------------------|
| 115.086475812849 | 244.6062 <sub>s</sub> | 8.18  |                                  |
| 120.080668708344 | 1400.47 <sub>s</sub>  | 46.84 |                                  |
| 129.100698571422 | 144.9496 <sub>s</sub> | 4.84  |                                  |
| 133.074874476376 | 340.933 <sub>s</sub>  | 11.40 |                                  |
| 137.914739560717 | 132.2962 <sub>s</sub> | 4.42  |                                  |
| 157.133575744062 | 1584.816 <sub>s</sub> | 53.01 | a2 (-0.00)                       |
| 160.077432357752 | 146.1855 <sub>s</sub> | 4.88  |                                  |
| 175.118734586684 | 696.2208 <sub>s</sub> | 23.28 | y1 (-0.00)                       |
| 185.128330521536 | 1892.978 <sub>s</sub> | 63.31 | b2 (-0.00)                       |
| 189.102032292474 | 254.6457 <sub>s</sub> | 8.51  |                                  |
| 198.125090265951 | 400.3843 <sub>s</sub> | 13.39 |                                  |
| 207.112369876585 | 965.6066 <sub>s</sub> | 32.29 |                                  |
| 217.095389985263 | 195.0688 <sub>s</sub> | 6.52  | y3*[2+] (-0.01) : z3[2+] (-0.01) |

Figure S3

|                  |           |       |                    |
|------------------|-----------|-------|--------------------|
| 226.118445106373 | 2219.913, | 74.25 |                    |
| 233.161412782682 | 199.8186, | 6.68  |                    |
| 235.107242740976 | 1395.886, | 46.69 |                    |
| 252.134829494968 | 599.0894, | 20.03 |                    |
| 254.149773843174 | 1449.208, | 48.47 | b3-98 (0.00)       |
| 260.139474300509 | 270.0221, | 9.03  |                    |
| 272.160675060668 | 324.5262, | 10.85 |                    |
| 288.134667700049 | 273.1284, | 9.13  |                    |
| 303.176176635407 | 360.7036, | 12.06 | y2 (-0.00)         |
| 304.128796244548 | 852.9989, | 28.53 |                    |
| 313.149358401612 | 983.3651, | 32.89 |                    |
| 322.138965028784 | 292.356,  | 9.77  |                    |
| 330.179425439348 | 224.4186, | 7.50  |                    |
| 337.257873463128 | 148.3311, | 4.96  |                    |
| 352.127391867676 | 195.5966, | 6.54  | b3 (4.68)          |
| 364.164215111735 | 467.5916, | 15.64 |                    |
| 366.22232586477  | 122.9942, | 4.11  |                    |
| 373.225342600265 | 763.7272, | 25.54 |                    |
| 375.166578982087 | 266.4028, | 8.91  |                    |
| 382.174580569964 | 437.7142, | 14.64 |                    |
| 397.809225410496 | 125.7324, | 4.20  |                    |
| 399.20119785153  | 457.2064, | 15.29 |                    |
| 401.216305119661 | 348.9869, | 11.67 | b4-98 (0.00)       |
| 417.360264183244 | 131.7106, | 4.40  |                    |
| 423.200056609128 | 549.5289, | 18.38 |                    |
| 450.245545428816 | 953.6787, | 31.89 | y3 (-0.00)         |
| 451.196983650786 | 776.7166, | 25.98 |                    |
| 458.198034194686 | 142.9333, | 4.78  |                    |
| 470.238287092367 | 372.8445, | 12.47 |                    |
| 479.75640320603  | 179.9287, | 6.01  |                    |
| 488.255690256077 | 182.9139, | 6.11  | b5-98 (0.01)       |
| 495.263689898459 | 232.1086, | 7.76  |                    |
| 501.796876402038 | 145.7105, | 4.87  |                    |
| 513.266786368295 | 186.4981, | 6.23  | a9o[2+] (0.01)     |
| 522.233539564453 | 225.5887, | 7.54  | a9[2+] (-0.01)     |
| 530.76110534525  | 143.4934, | 4.79  | b10-98[2+] (-0.01) |
| 536.291881801932 | 184.5802, | 6.17  |                    |
| 546.272328880725 | 345.8319, | 11.56 |                    |
| 563.331964890352 | 936.213,  | 31.31 | y4 (0.00)          |
| 564.278627371613 | 490.7664, | 16.41 |                    |
| 607.334281421138 | 129.8538, | 4.34  |                    |
| 608.317947031845 | 303.4037, | 10.14 |                    |
| 617.301535459411 | 138.1768, | 4.62  |                    |

Figure S3

|                  |           |       |                    |
|------------------|-----------|-------|--------------------|
| 635.318824691056 | 1099.768, | 36.78 | b6-98 (0.00)       |
| 673.33309459599  | 143.9009, | 4.81  |                    |
| 679.348398504103 | 170.5854, | 5.70  |                    |
| 681.309080577769 | 145.7011, | 4.87  | y11[2+] (-0.01)    |
| 687.36746109763  | 166.6562, | 5.57  |                    |
| 691.421961972494 | 369.2962, | 12.35 | y5 (-0.00)         |
| 716.420303382814 | 132.7292, | 4.43  |                    |
| 717.867275501356 | 395.429,  | 13.22 |                    |
| 718.377737859127 | 405.3716, | 13.55 |                    |
| 720.395728873642 | 159.2284, | 5.32  |                    |
| 727.872943151538 | 343.8822, | 11.50 |                    |
| 748.399418606985 | 478.5472, | 16.00 | b7-98 (0.00)       |
| 758.400939284111 | 379.8635, | 12.70 |                    |
| 775.424990108099 | 134.3638, | 4.49  |                    |
| 780.410737784568 | 215.7874, | 7.21  |                    |
| 792.429513325155 | 175.1945, | 5.86  |                    |
| 792.940345202008 | 361.6625, | 12.09 |                    |
| 797.338309971147 | 158.5562, | 5.30  |                    |
| 801.426194157124 | 232.5715, | 7.77  | y14-98[2+] (-0.00) |
| 811.393808880328 | 692.2307, | 23.15 |                    |
| 812.509549427392 | 523.9662, | 17.52 |                    |
| 820.463717645503 | 177.4988, | 5.93  | y6 (-0.00)         |
| 850.91871539137  | 211.5274, | 7.07  |                    |
| 857.06735232585  | 137.4559, | 4.59  |                    |
| 889.464423671115 | 225.528,  | 7.54  |                    |
| 907.5038370039   | 255.6985, | 8.55  | y7 (0.00)          |
| 941.496323260819 | 268.9549, | 8.99  |                    |
| 945.509676448229 | 1492.796, | 49.93 |                    |
| 958.508435569047 | 1537.952, | 51.44 |                    |
| 976.523419150955 | 962.0775, | 32.18 | y8-98 (0.01)       |
| 1082.80681154668 | 174.272,  | 5.82  |                    |
| 1089.58419755801 | 541.5483, | 18.11 | y9-98 (-0.01)      |
| 1158.61948938424 | 209.3681, | 7.00  |                    |
| 1176.60576093931 | 427.1814, | 14.28 |                    |
| 1177.64814926174 | 300.1272, | 10.03 |                    |
| 1201.68888091753 | 188.1896, | 6.29  |                    |
| 1227.63938781833 | 883.517,  | 29.55 |                    |
| 1245.66128208397 | 280.2534, | 9.37  |                    |
| 1246.63774488712 | 218.1376, | 7.29  |                    |
| 1263.67087190437 | 943.4734, | 31.55 | y11-98 (0.01)      |
| 1293.15318440604 | 203.1151, | 6.79  |                    |
| 1361.6693602814  | 181.3989, | 6.06  |                    |
| 1452.75551771001 | 886.8753, | 29.66 |                    |

Figure S3

|                  |           |       |               |
|------------------|-----------|-------|---------------|
| 1470.76517456316 | 2428.688, | 81.23 |               |
| 1470.79890440855 | 195.3391, | 6.53  |               |
| 1471.74689396861 | 247.293,  | 8.27  |               |
| 1472.78159857269 | 177.0214, | 5.92  |               |
| 1488.77389764326 | 2989.639, | 100   | y13-98 (0.00) |
| 1489.78454999192 | 772.5894, | 25.84 |               |
| 1544.05693321753 | 195.805,  | 6.54  |               |
| 1550.72670352451 | 964.5644, | 32.26 |               |
| 1568.73886882621 | 872.6167, | 29.18 | y13o (-0.00)  |
| 1569.75646225908 | 193.6003, | 6.47  |               |
| 1586.7561430589  | 2082.125, | 69.64 | y13 (-0.00)   |
| 1673.6528527171  | 178.2573, | 5.96  |               |
| 1703.14601197146 | 150.9439, | 5.04  |               |
| 1808.26361864817 | 181.9556, | 6.08  |               |
| 1989.07881921523 | 186.5828, | 6.24  |               |

Figure S3



# ProPhosSI MS/MS report

Mass: 811.3806 Charge: 3+

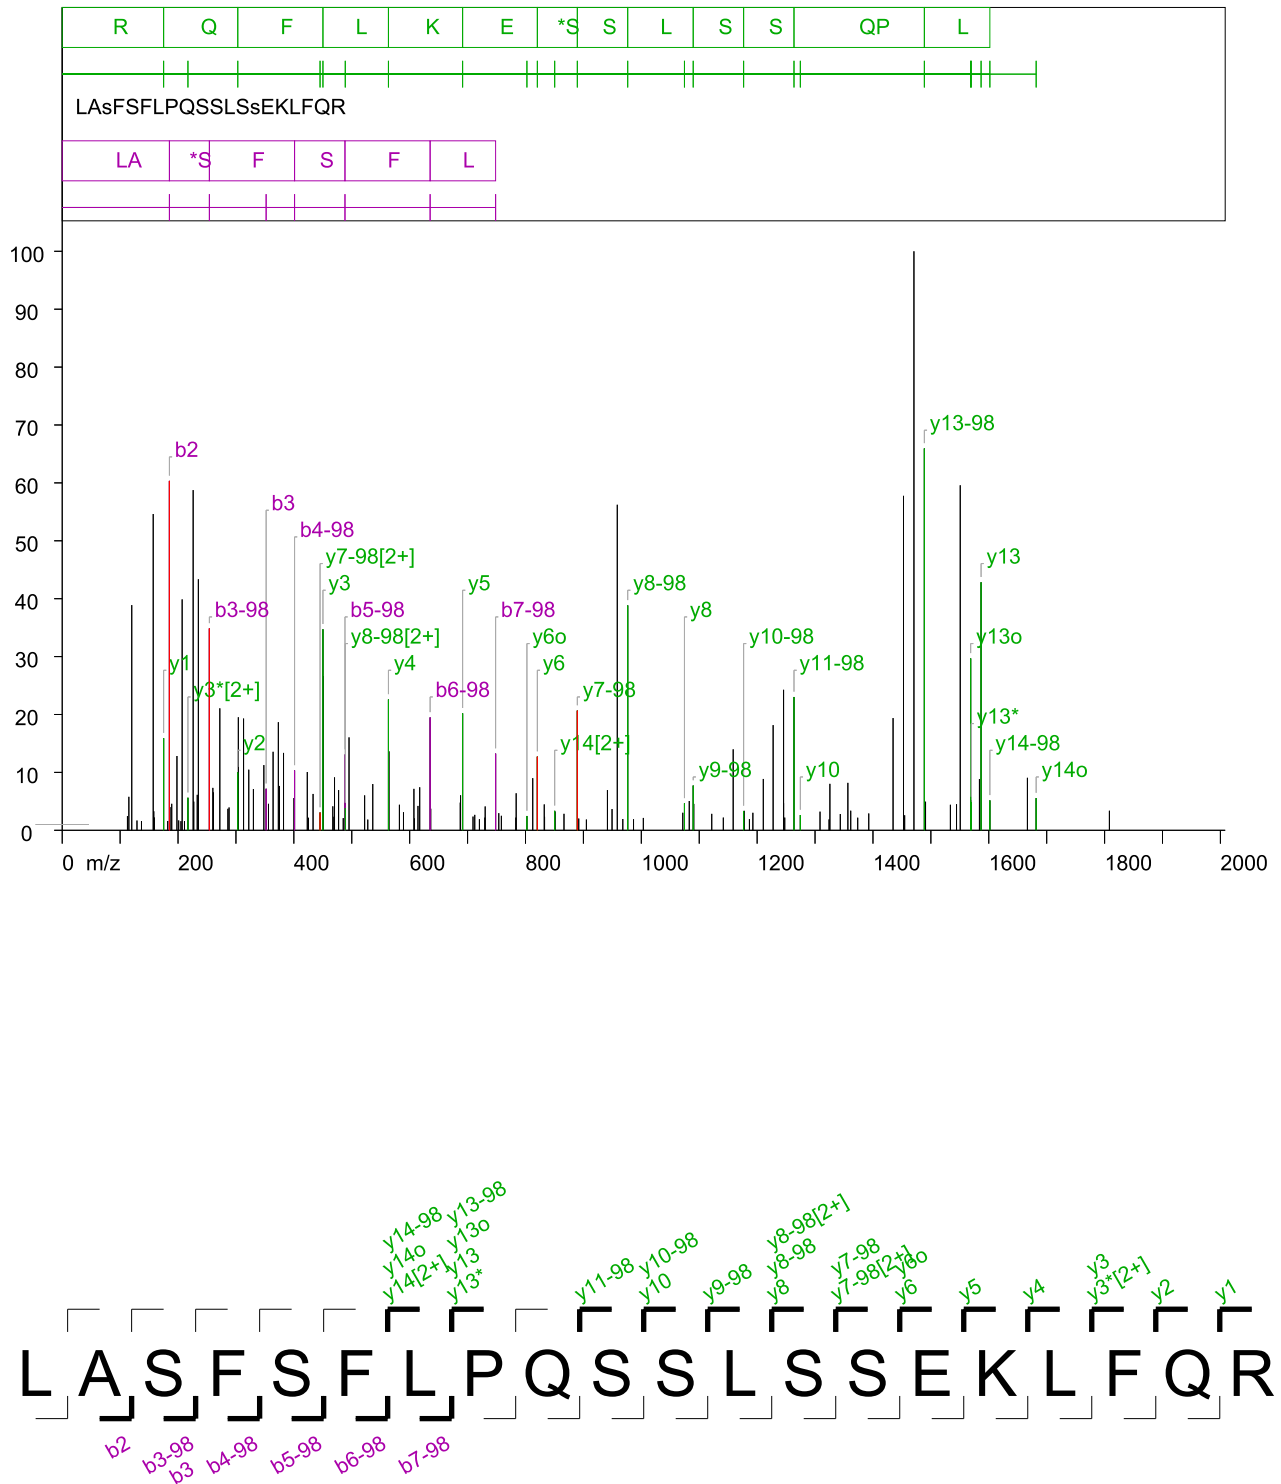

Figure S3

## 5-HT2A

(40) 278 LAsFSFLPQSSLSsEKLfQR 297 2431.122 (-0.0042) Da

|                         |     |
|-------------------------|-----|
| Parent Ion              | m/z |
| No parent ions observed |     |

### Modifications and supporting evidence

| Position | Residue ID | Modification | Evidence    |
|----------|------------|--------------|-------------|
| 3        | (280)      | Phospho (ST) | b2 => b3-98 |
| 14       | (291)      | Phospho (ST) | y6 => y7-98 |

### Spectrum interpretation

| Rule                                   | passed/tests | Description                                                                                                                                                                                                                                                                                                                                                                                                                                                                                                                                                                                                                                                                                                                                  |
|----------------------------------------|--------------|----------------------------------------------------------------------------------------------------------------------------------------------------------------------------------------------------------------------------------------------------------------------------------------------------------------------------------------------------------------------------------------------------------------------------------------------------------------------------------------------------------------------------------------------------------------------------------------------------------------------------------------------------------------------------------------------------------------------------------------------|
| Parent ions present                    | 0/1          | Parent ions corresponding to the parent fragment - 2 phosphate ions were not found                                                                                                                                                                                                                                                                                                                                                                                                                                                                                                                                                                                                                                                           |
| Three -98 Ions present                 | 1/1          | 12 des-phospho fragment ions were found.                                                                                                                                                                                                                                                                                                                                                                                                                                                                                                                                                                                                                                                                                                     |
| Unique -98 transitions present         | 2/2          | transition b2 to b3-98 support unique phosphorylation at position 3<br><br/>transition y6 to y7-98 support unique phosphorylation at position 14<br><br/>                                                                                                                                                                                                                                                                                                                                                                                                                                                                                                                                                                                    |
| Four Sequential b or y ions            | 1/1          | Sequence of four b ions found from b2 to b5-98.<br>Sequence of four y ions found from y1 to y4.                                                                                                                                                                                                                                                                                                                                                                                                                                                                                                                                                                                                                                              |
| Five of six sequential ions present    | 1/1          | Five of Six ions found between b1 and b6<br>Five of Six ions found between b2 and b7<br>Five of Six ions found between b3 and b8<br>Five of Six ions found between y0 and y5<br>Five of Six ions found between y1 and y6<br>Five of Six ions found between y2 and y7<br>Five of Six ions found between y3 and y8<br>Five of Six ions found between y4 and y9<br>Five of Six ions found between y5 and y10<br>Five of Six ions found between y6 and y11<br>Five of Six ions found between y7 and y12<br>Five of Six ions found between y8 and y13<br>Five of Six ions found between y9 and y14                                                                                                                                                |
| Proline directed fragmentation pattern | 2/2          | PASS: y13-98> y12-98<br/><br>PASS: b8-98< b7-98<br/>                                                                                                                                                                                                                                                                                                                                                                                                                                                                                                                                                                                                                                                                                         |
| PhosphoTyrosine transition present     | 0/0          | 0 of 0 phosphotyrosine transitions were found.                                                                                                                                                                                                                                                                                                                                                                                                                                                                                                                                                                                                                                                                                               |
| Six of top ten ions identified         | 4/6          | ion 1 (mass: 1470.76163348332: intensity: 14058.48) assigned 0 times<br>ion 2 (mass: 1488.77368212528: intensity: 9271.057) assigned 1 times<br>ion 3 (mass: 185.127930453159: intensity: 8483.474) assigned 1 times<br>ion 4 (mass: 1550.72672251521: intensity: 8377.197) assigned 0 times<br>ion 5 (mass: 226.118077260304: intensity: 8259.873) assigned 0 times<br>ion 6 (mass: 1452.75525480323: intensity: 8120.36) assigned 0 times<br>ion 7 (mass: 958.509129623671: intensity: 7904.004) assigned 0 times<br>ion 8 (mass: 157.133107477626: intensity: 7678.937) assigned 1 times<br>ion 9 (mass: 235.107092285844: intensity: 6094.658) assigned 0 times<br>ion 10 (mass: 1586.74881196566: intensity: 6021.309) assigned 1 times |

Figure S3

## Ion Table

33 ions assigned of 133 ions above threshold (24%).

### N-terminal ions

| AA | N-ion | b                                | b*       | b-196    | b-98                             | bo       |
|----|-------|----------------------------------|----------|----------|----------------------------------|----------|
| L  | 1     | 114.091                          | 97.065   | -        | -                                | 96.081   |
| A  | 2     | 185.129<br>185.127930453159 (60) | 168.102  | -        | -                                | 167.118  |
| s  | 3     | 352.127<br>352.1270259368 (7)    | 335.100  | -        | 254.141<br>254.149336220203 (34) | 334.116  |
| F  | 4     | 499.195                          | 482.169  | -        | 401.209<br>401.215271569225 (10) | 481.185  |
| S  | 5     | 586.227                          | 569.201  | -        | 488.241<br>488.250691595505 (13) | 568.217  |
| F  | 6     | 733.296                          | 716.269  | -        | 635.310<br>635.315208568773 (19) | 715.285  |
| L  | 7     | 846.380                          | 829.353  | -        | 748.394<br>748.404633472677 (13) | 828.369  |
| P  | 8     | 943.433                          | 926.406  | -        | 845.447                          | 925.422  |
| Q  | 9     | 1071.491                         | 1054.465 | -        | 973.505                          | 1053.481 |
| S  | 10    | 1158.523                         | 1141.497 | -        | 1060.537                         | 1140.513 |
| S  | 11    | 1245.555                         | 1228.529 | -        | 1147.569                         | 1227.545 |
| L  | 12    | 1358.639                         | 1341.613 | -        | 1260.653                         | 1340.629 |
| S  | 13    | 1445.671                         | 1428.645 | -        | 1347.685                         | 1427.661 |
| s  | 14    | 1612.670                         | 1595.643 | 1416.698 | 1514.684                         | 1594.659 |
| E  | 15    | 1741.712                         | 1724.686 | 1545.740 | 1643.726                         | 1723.702 |
| K  | 16    | 1869.807                         | 1852.781 | 1673.835 | 1771.821                         | 1851.797 |
| L  | 17    | 1982.891                         | 1965.865 | 1786.919 | 1884.905                         | 1964.881 |
| F  | 18    | 2129.960                         | 2112.933 | 1933.988 | 2031.974                         | 2111.949 |
| Q  | 19    | 2258.018                         | 2240.992 | 2062.046 | 2160.032                         | 2240.008 |
| R  | 20    | -                                | -        | -        | -                                | -        |

### C-terminal ions

| AA | C-ion | y                                       | y*                                | y-196    | y-98                                 | yo                                   |
|----|-------|-----------------------------------------|-----------------------------------|----------|--------------------------------------|--------------------------------------|
| L  | 20    | -                                       | -                                 | -        | -                                    | -                                    |
| A  | 19    | 2319.046                                | 2302.019                          | 2123.074 | 2221.060                             | 2301.035                             |
| s  | 18    | 2248.009                                | 2230.982                          | 2052.037 | 2150.023                             | 2229.998                             |
| F  | 17    | 2081.010                                | 2063.984                          | -        | 1983.025                             | 2063.000                             |
| S  | 16    | 1933.942                                | 1916.915                          | -        | 1835.956                             | 1915.931                             |
| F  | 15    | 1846.910                                | 1829.883                          | -        | 1748.924                             | 1828.899                             |
| L  | 14    | 1699.842<br>850.41549439817 [2+]<br>(3) | 1682.815                          | -        | 1601.856<br>1601.86266460894 (5)     | 1681.831<br>1681.81315529978 (5)     |
| P  | 13    | 1586.757<br>1586.74881196566<br>(42)    | 1569.731<br>*1569.74846759354 (4) | -        | 1488.772<br>1488.77368212528<br>(65) | 1568.747<br>1568.74044423296<br>(29) |
| Q  | 12    | 1489.705                                | 1472.678                          | -        | 1391.719                             | 1471.694                             |
| S  | 11    | 1361.646                                | 1344.620                          | -        | 1263.660<br>1263.66620099434<br>(23) | 1343.636                             |
| S  | 10    | 1274.614<br>1274.60468775584 (2)        | 1257.588                          | -        | 1176.628<br>1176.63722089752 (3)     | 1256.604                             |
| L  | 9     | 1187.582                                | 1170.556                          | -        | 1089.596<br>1089.6033394263 (7)      | 1169.572                             |

Figure S3

|   |   |                                     |                                          |   |                                                                     |                                 |
|---|---|-------------------------------------|------------------------------------------|---|---------------------------------------------------------------------|---------------------------------|
| S | 8 | 1074.498<br>1074.49434922973 (4)    | 1057.471                                 | - | 976.512<br>976.515837348386<br>(38)<br>488.761862141534<br>[2+] (3) | 1056.487                        |
| s | 7 | 987.466                             | 970.439                                  | - | 889.480<br>445.246729161158<br>[2+] (3)<br>889.490767651596<br>(20) | 969.455                         |
| E | 6 | 820.468<br>820.464599924209<br>(12) | 803.441                                  | - | -                                                                   | 802.457<br>802.458061915472 (2) |
| K | 5 | 691.425<br>691.422549632987<br>(20) | 674.399                                  | - | -                                                                   | 673.414                         |
| L | 4 | 563.330<br>563.328881184491<br>(22) | 546.304                                  | - | -                                                                   | 545.320                         |
| F | 3 | 450.246<br>450.243174369696<br>(34) | 433.219<br>*217.096677224044<br>[2+] (5) | - | -                                                                   | 432.235                         |
| Q | 2 | 303.178<br>303.176913504457<br>(10) | 286.151                                  | - | -                                                                   | 285.167                         |
| R | 1 | 175.119<br>175.118617339375<br>(15) | 158.092                                  | - | -                                                                   | 157.108                         |

### Ion distribution

| Threshold | Ion count | Matches | % matched |
|-----------|-----------|---------|-----------|
| 0         | 146       | 34      | 23        |
| 0.5       | 146       | 34      | 23        |
| 1         | 146       | 34      | 23        |
| 2         | 133       | 33      | 24        |
| 3         | 108       | 30      | 27        |
| 4         | 90        | 26      | 28        |
| 5         | 74        | 24      | 32        |
| 10        | 44        | 19      | 43        |

### Observed ions > 1%

| m/z              | Intensity             | % max | Assignment (delta) |
|------------------|-----------------------|-------|--------------------|
| 112.650561704402 | 343.8671 <sub>s</sub> | 2.44  |                    |
| 115.086004524778 | 812.8741 <sub>s</sub> | 5.78  |                    |
| 120.080296160141 | 5466.93 <sub>s</sub>  | 38.88 |                    |
| 129.103513479681 | 236.8871 <sub>s</sub> | 1.68  |                    |
| 136.884157104203 | 225.0041 <sub>s</sub> | 1.60  |                    |
| 157.133107477626 | 7678.937 <sub>s</sub> | 54.62 | a2 (-0.00)         |
| 158.13592222714  | 461.1295 <sub>s</sub> | 3.28  |                    |
| 159.075557546639 | 310.3123 <sub>s</sub> | 2.20  |                    |
| 175.118617339375 | 2236.423 <sub>s</sub> | 15.90 | y1 (-0.00)         |
| 182.174006504626 | 226.0673 <sub>s</sub> | 1.60  |                    |
| 185.127930453159 | 8483.474 <sub>s</sub> | 60.34 | b2 (-0.00)         |

Figure S3

|                  |           |       |                                  |
|------------------|-----------|-------|----------------------------------|
| 186.131772909014 | 562.3774, | 4.00  |                                  |
| 189.102126798161 | 643.1686, | 4.57  |                                  |
| 198.123134657274 | 1803.747, | 12.83 |                                  |
| 201.122176790028 | 238.8865, | 1.69  | b4-98[2+] (0.01)                 |
| 205.024880759745 | 221.4104, | 1.57  |                                  |
| 207.112063864184 | 5606.69,  | 39.88 |                                  |
| 211.140466818875 | 222.2124, | 1.58  |                                  |
| 217.096677224044 | 789.4785, | 5.61  | y3*[2+] (-0.01) : z3[2+] (-0.01) |
| 226.118077260304 | 8259.873, | 58.75 |                                  |
| 227.122308298695 | 695.4792, | 4.94  |                                  |
| 233.164926222617 | 860.9671, | 6.12  |                                  |
| 235.107092285844 | 6094.658, | 43.35 |                                  |
| 254.149336220203 | 4900.375, | 34.85 | b3-98 (0.00)                     |
| 260.13824156774  | 1029.558, | 7.32  |                                  |
| 261.157695224926 | 919.1305, | 6.53  |                                  |
| 272.159647818619 | 2961.461, | 21.06 |                                  |
| 286.117129799716 | 521.2686, | 3.70  |                                  |
| 288.132980452366 | 554.0073, | 3.94  |                                  |
| 303.176913504457 | 1409.1,   | 10.02 | y2 (-0.00)                       |
| 304.128532442337 | 2744.249, | 19.52 |                                  |
| 313.15005368221  | 2713.158, | 19.29 |                                  |
| 322.139015224226 | 1471.461, | 10.46 |                                  |
| 330.180008203185 | 1001.264, | 7.12  |                                  |
| 348.19079482348  | 1582.574, | 11.25 |                                  |
| 352.1270259368   | 1007.959, | 7.16  | b3 (-0.00)                       |
| 356.197415048707 | 642.4418, | 4.56  |                                  |
| 364.163078839505 | 1906.082, | 13.55 |                                  |
| 373.222433671109 | 2624.351, | 18.66 |                                  |
| 375.165511023253 | 1076.39,  | 7.65  |                                  |
| 382.172653680704 | 1878.478, | 13.36 |                                  |
| 400.180962797082 | 783.3706, | 5.57  |                                  |
| 401.215271569225 | 1452.29,  | 10.33 | b4-98 (0.00)                     |
| 423.201582919969 | 1414.322, | 10.06 |                                  |
| 425.220043245679 | 304.0442, | 2.16  |                                  |
| 433.18538190622  | 882.4131, | 6.27  |                                  |
| 445.246729161158 | 429.89,   | 3.05  | y7-98[2+] (0.00)                 |
| 450.243174369696 | 4880.013, | 34.71 | y3 (-0.00)                       |
| 451.19813208846  | 3744.778, | 26.63 |                                  |
| 467.265009869109 | 581.7351, | 4.13  |                                  |
| 469.204628695936 | 328.0904, | 2.33  |                                  |
| 470.236728188091 | 1284.61,  | 9.13  |                                  |
| 477.24561502676  | 976.1146, | 6.94  |                                  |
| 485.270071049158 | 295.1492, | 2.09  |                                  |

Figure S3

|                  |           |       |                  |
|------------------|-----------|-------|------------------|
| 488.250691595505 | 1837.385, | 13.06 | b5-98 (0.00)     |
| 488.761862141534 | 539.3345, | 3.83  | y8-98[2+] (0.00) |
| 495.255828787344 | 2255.698, | 16.04 |                  |
| 522.229011078452 | 847.3423, | 6.02  |                  |
| 527.63232028096  | 259.5875, | 1.84  |                  |
| 536.283124141096 | 1122.323, | 7.98  |                  |
| 563.328881184491 | 3176.474, | 22.59 | y4 (-0.00)       |
| 564.277402541035 | 1916.86,  | 13.63 |                  |
| 582.289329235562 | 619.9152, | 4.40  |                  |
| 589.314036132004 | 438.3084, | 3.11  |                  |
| 607.324159961669 | 1005.97,  | 7.15  |                  |
| 608.315981009447 | 287.2435, | 2.04  |                  |
| 614.326431215456 | 591.5825, | 4.20  |                  |
| 617.309262276776 | 1044.226, | 7.42  |                  |
| 635.315208568773 | 2739.549, | 19.48 | b6-98 (0.00)     |
| 636.330793176896 | 524.0677, | 3.72  |                  |
| 687.363963628419 | 672.401,  | 4.78  |                  |
| 687.855335716055 | 849.4122, | 6.04  |                  |
| 691.422549632987 | 2839.987, | 20.20 | y5 (-0.00)       |
| 709.359792075255 | 332.6599, | 2.36  | a13[2+] (0.01)   |
| 712.39008267781  | 374.526,  | 2.66  |                  |
| 720.420552085708 | 268.7951, | 1.91  |                  |
| 729.899762691378 | 307.4103, | 2.18  |                  |
| 730.387208414242 | 578.7772, | 4.11  |                  |
| 748.404633472677 | 1861.163, | 13.23 | b7-98 (0.01)     |
| 753.88831889407  | 415.5214, | 2.95  |                  |
| 758.355225156759 | 351.3311, | 2.49  |                  |
| 783.409751314286 | 307.8015, | 2.18  |                  |
| 783.921216732234 | 898.6155, | 6.39  |                  |
| 802.458061915472 | 347.4336, | 2.47  | y6o (0.00)       |
| 812.502206175493 | 1265.406, | 9.00  |                  |
| 820.464599924209 | 1788.022, | 12.71 | y6 (-0.00)       |
| 832.413823865856 | 628.1226, | 4.46  |                  |
| 832.902580685863 | 327.6867, | 2.33  |                  |
| 850.41549439817  | 472.0758, | 3.35  | y14[2+] (-0.00)  |
| 850.93836138324  | 452.1765, | 3.21  |                  |
| 866.459226157088 | 400.112,  | 2.84  |                  |
| 889.490767651596 | 2906.054, | 20.67 | y7-98 (0.01)     |
| 891.964382445441 | 284.574,  | 2.02  |                  |
| 905.176554801675 | 260.7159, | 1.85  |                  |
| 941.481127778634 | 975.5826, | 6.93  |                  |
| 949.467270226536 | 514.9477, | 3.66  |                  |
| 958.509129623671 | 7904.004, | 56.22 |                  |

Figure S3

|                  |                       |       |                          |
|------------------|-----------------------|-------|--------------------------|
| 968.00691283512  | 273.9839 <sub>1</sub> | 1.94  |                          |
| 976.515837348386 | 5459.811 <sub>1</sub> | 38.83 | y8-98 (0.00)             |
| 986.553875457366 | 268.2345 <sub>1</sub> | 1.90  |                          |
| 1003.48246092062 | 299.6903 <sub>1</sub> | 2.13  |                          |
| 1071.59137153271 | 425.4649 <sub>1</sub> | 3.02  |                          |
| 1074.49434922973 | 651.7751 <sub>1</sub> | 4.63  | y8 (-0.00)               |
| 1082.79269419486 | 710.7668 <sub>1</sub> | 5.05  |                          |
| 1089.6033394263  | 1085.764 <sub>1</sub> | 7.72  | y9-98 (0.00)             |
| 1090.59484674019 | 641.1929 <sub>1</sub> | 4.56  |                          |
| 1121.60283480062 | 399.0441 <sub>1</sub> | 2.83  |                          |
| 1141.61608710246 | 308.3931 <sub>1</sub> | 2.19  |                          |
| 1158.63037854916 | 1965.693 <sub>1</sub> | 13.98 |                          |
| 1176.63722089752 | 468.5769 <sub>1</sub> | 3.33  | y10-98 (0.00)            |
| 1177.59696516822 | 472.8737 <sub>1</sub> | 3.36  |                          |
| 1186.70975472891 | 270.214 <sub>1</sub>  | 1.92  |                          |
| 1192.62039087947 | 424.9232 <sub>1</sub> | 3.02  |                          |
| 1210.63441196721 | 1246.278 <sub>1</sub> | 8.86  |                          |
| 1227.64390343266 | 2553.451 <sub>1</sub> | 18.16 |                          |
| 1245.64871773718 | 3411.422 <sub>1</sub> | 24.26 |                          |
| 1245.66332316627 | 659.2913 <sub>1</sub> | 4.68  |                          |
| 1247.67920293057 | 307.9808 <sub>1</sub> | 2.19  |                          |
| 1263.66620099434 | 3236.759 <sub>1</sub> | 23.02 | y11-98 (0.00)            |
| 1274.60468775584 | 371.0995 <sub>1</sub> | 2.63  | y10 (-0.00)              |
| 1308.60580343289 | 452.6648 <sub>1</sub> | 3.21  |                          |
| 1324.21415091289 | 263.7643 <sub>1</sub> | 1.87  |                          |
| 1325.62517946075 | 1127.813 <sub>1</sub> | 8.02  |                          |
| 1343.61406401428 | 394.5172 <sub>1</sub> | 2.80  |                          |
| 1356.69455035672 | 1151.534 <sub>1</sub> | 8.19  |                          |
| 1361.62480132484 | 475.5161 <sub>1</sub> | 3.38  |                          |
| 1373.69160381894 | 305.6039 <sub>1</sub> | 2.17  |                          |
| 1392.75329906264 | 408.2734 <sub>1</sub> | 2.90  |                          |
| 1434.7414618845  | 2724.375 <sub>1</sub> | 19.37 |                          |
| 1452.75525480323 | 8120.36 <sub>1</sub>  | 57.76 |                          |
| 1454.72564478204 | 363.8668 <sub>1</sub> | 2.58  |                          |
| 1470.76163348332 | 14058.48 <sub>1</sub> | 100   |                          |
| 1488.77368212528 | 9271.057 <sub>1</sub> | 65.94 | y13-98 (0.00)            |
| 1490.7973479686  | 693.8813 <sub>1</sub> | 4.93  |                          |
| 1533.69816845886 | 619.4782 <sub>1</sub> | 4.40  |                          |
| 1544.32138738546 | 632.3989 <sub>1</sub> | 4.49  |                          |
| 1550.72672251521 | 8377.197 <sub>1</sub> | 59.58 |                          |
| 1568.72055538327 | 732.8612 <sub>1</sub> | 5.21  |                          |
| 1568.74044423296 | 4172.783 <sub>1</sub> | 29.68 | y13o (-0.00)             |
| 1569.74846759354 | 685.3838 <sub>1</sub> | 4.87  | y13* (0.01) : z13 (0.01) |

Figure S3

|                  |                       |       |               |
|------------------|-----------------------|-------|---------------|
| 1583.8499999924  | 1244.955 <sub>2</sub> | 8.85  |               |
| 1586.74881196566 | 6021.309 <sub>2</sub> | 42.83 | y13 (-0.00)   |
| 1601.86266460894 | 725.6587 <sub>2</sub> | 5.16  | y14-98 (0.00) |
| 1666.70826454442 | 1274.329 <sub>2</sub> | 9.06  |               |
| 1681.81315529978 | 781.3789 <sub>2</sub> | 5.55  | y14o (-0.01)  |
| 1808.28095750175 | 474.6764 <sub>2</sub> | 3.37  |               |

Figure S3



# ProPhosSI MS/MS report

Mass: 838.035 Charge: 3+

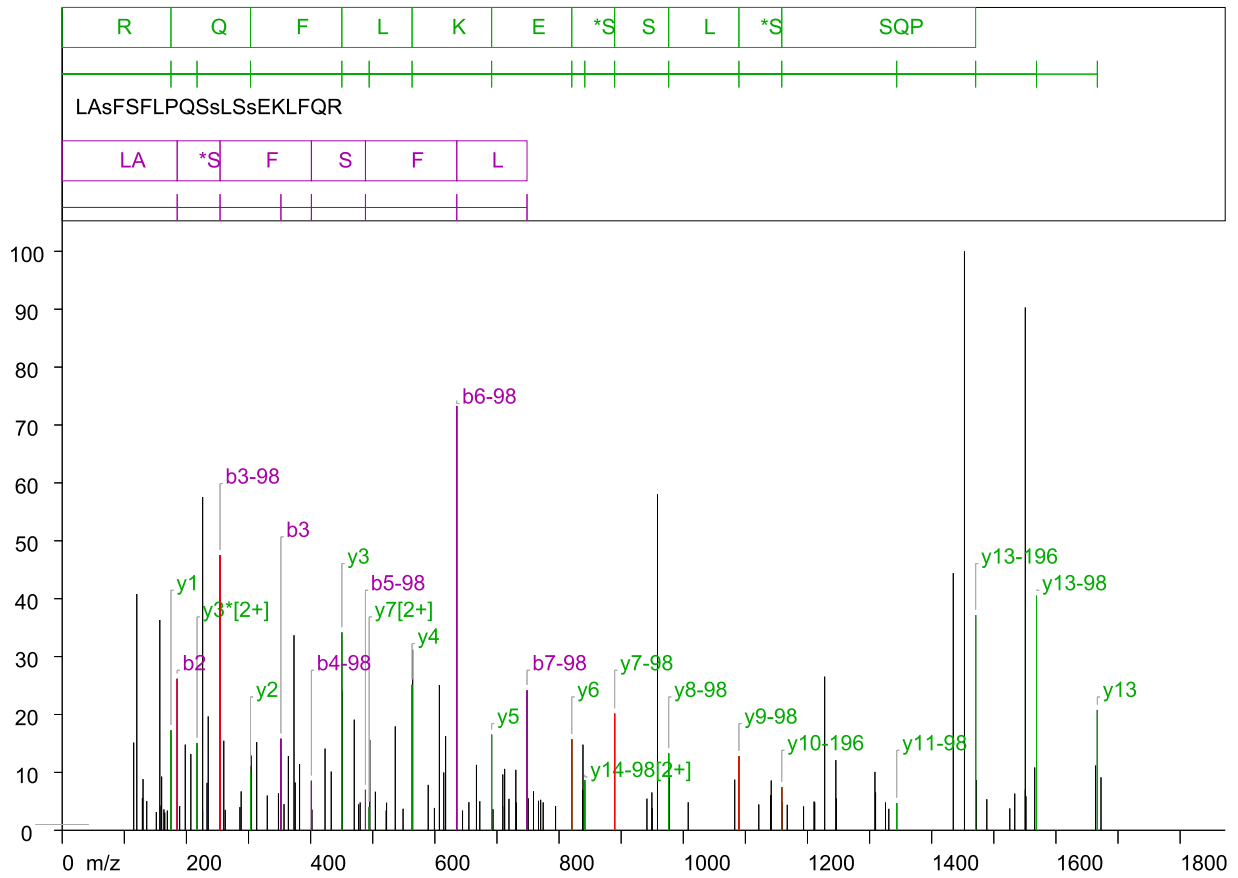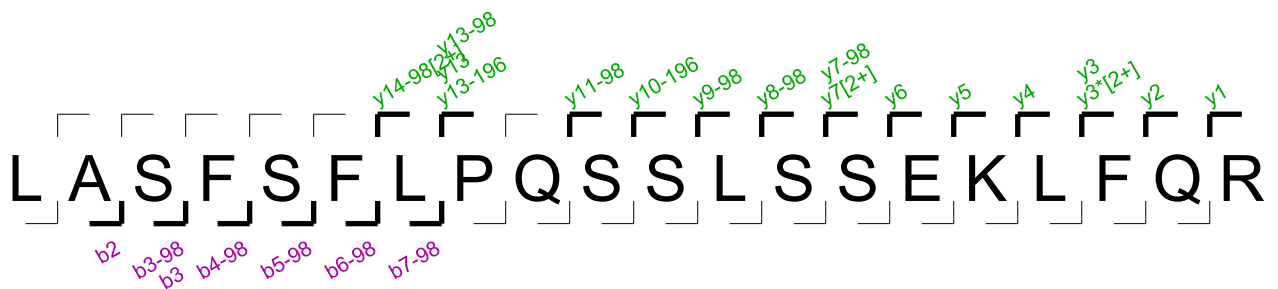

Figure S3

## 5-HT2A

(21) 278 LAsFSFLPQSSLSsEKLFQR 297 2511.088 (-0.0073) Da

|                         |     |
|-------------------------|-----|
| Parent Ion              | m/z |
| No parent ions observed |     |

### Modifications and supporting evidence

| Position | Residue ID | Modification | Evidence         |
|----------|------------|--------------|------------------|
| 3        | (280)      | Phospho (ST) | b2 => b3-98      |
| 14       | (291)      | Phospho (ST) | y6 => y7-98      |
| 11       | (288)      | Phospho (ST) | y9-98 => y10-196 |

### Spectrum interpretation

| Rule                                   | passed/tests | Description                                                                                                                                                                                                                                                                                                                                                                                                                                                                                                                                                                                                                                                                                                                                |
|----------------------------------------|--------------|--------------------------------------------------------------------------------------------------------------------------------------------------------------------------------------------------------------------------------------------------------------------------------------------------------------------------------------------------------------------------------------------------------------------------------------------------------------------------------------------------------------------------------------------------------------------------------------------------------------------------------------------------------------------------------------------------------------------------------------------|
| Parent ions present                    | 0/1          | Parent ions corresponding to the parent fragment - 3 phosphate ions were not found                                                                                                                                                                                                                                                                                                                                                                                                                                                                                                                                                                                                                                                         |
| Three -98 Ions present                 | 1/1          | 10 des-phospho fragment ions were found.                                                                                                                                                                                                                                                                                                                                                                                                                                                                                                                                                                                                                                                                                                   |
| Unique -98 transitions present         | 3/3          | transition b2 to b3-98 support unique phosphorylation at position 3<br><br/>transition y6 to y7-98 support unique phosphorylation at position 14<br><br/>transition y9-98 to y10-196 support unique phosphorylation at position 11<br><br/>                                                                                                                                                                                                                                                                                                                                                                                                                                                                                                |
| Four Sequential b or y ions            | 1/1          | Sequence of four b ions found from b2 to b5-98.<br>Sequence of four y ions found from y1 to y4.                                                                                                                                                                                                                                                                                                                                                                                                                                                                                                                                                                                                                                            |
| Five of six sequential ions present    | 1/1          | Five of Six ions found between b1 and b6<br>Five of Six ions found between b2 and b7<br>Five of Six ions found between b3 and b8<br>Five of Six ions found between y0 and y5<br>Five of Six ions found between y1 and y6<br>Five of Six ions found between y2 and y7<br>Five of Six ions found between y3 and y8<br>Five of Six ions found between y4 and y9<br>Five of Six ions found between y5 and y10<br>Five of Six ions found between y6 and y11                                                                                                                                                                                                                                                                                     |
| Proline directed fragmentation pattern | 2/2          | PASS: y13-196> y12-196<br/><br>PASS: b8-98< b7-98<br/>                                                                                                                                                                                                                                                                                                                                                                                                                                                                                                                                                                                                                                                                                     |
| PhosphoTyrosine transition present     | 0/0          | 0 of 0 phosphotyrosine transitions were found.                                                                                                                                                                                                                                                                                                                                                                                                                                                                                                                                                                                                                                                                                             |
| Six of top ten ions identified         | 4/6          | ion 1 (mass: 1452.76047263653: intensity: 4105.77) assigned 0 times<br>ion 2 (mass: 1550.73199749264: intensity: 3707.406) assigned 0 times<br>ion 3 (mass: 635.31681567314: intensity: 3009.225) assigned 1 times<br>ion 4 (mass: 958.510632082482: intensity: 2383.28) assigned 0 times<br>ion 5 (mass: 226.118333902931: intensity: 2363.376) assigned 0 times<br>ion 6 (mass: 254.149968050718: intensity: 1950.642) assigned 1 times<br>ion 7 (mass: 1434.74552317685: intensity: 1823.894) assigned 0 times<br>ion 8 (mass: 120.080402043637: intensity: 1675.335) assigned 0 times<br>ion 9 (mass: 1568.74683510991: intensity: 1662.965) assigned 1 times<br>ion 10 (mass: 1470.77166105214: intensity: 1526.216) assigned 1 times |

Figure S3

## Ion Table

27 ions assigned of 129 ions above threshold (20%).

### N-terminal ions

| AA | N-ion | b                                | b*       | b-196    | b-294    | b-98                             | bo       |
|----|-------|----------------------------------|----------|----------|----------|----------------------------------|----------|
| L  | 1     | 114.091                          | 97.065   | -        | -        | -                                | 96.081   |
| A  | 2     | 185.129<br>185.127985070283 (26) | 168.102  | -        | -        | -                                | 167.118  |
| s  | 3     | 352.127<br>352.126095233316 (15) | 335.100  | -        | -        | 254.141<br>254.149968050718 (47) | 334.116  |
| F  | 4     | 499.195                          | 482.169  | -        | -        | 401.209<br>401.218031937405 (8)  | 481.185  |
| S  | 5     | 586.227                          | 569.201  | -        | -        | 488.241<br>488.24951760832 (6)   | 568.217  |
| F  | 6     | 733.296                          | 716.269  | -        | -        | 635.310<br>635.31681567314 (73)  | 715.285  |
| L  | 7     | 846.380                          | 829.353  | -        | -        | 748.394<br>748.401767107408 (24) | 828.369  |
| P  | 8     | 943.433                          | 926.406  | -        | -        | 845.447                          | 925.422  |
| Q  | 9     | 1071.491                         | 1054.465 | -        | -        | 973.505                          | 1053.481 |
| S  | 10    | 1158.523                         | 1141.497 | -        | -        | 1060.537                         | 1140.513 |
| s  | 11    | 1325.521                         | 1308.495 | 1129.550 | -        | 1227.536                         | 1307.511 |
| L  | 12    | 1438.606                         | 1421.579 | 1242.634 | -        | 1340.620                         | 1420.595 |
| S  | 13    | 1525.638                         | 1508.611 | 1329.666 | -        | 1427.652                         | 1507.627 |
| s  | 14    | 1692.636                         | 1675.609 | 1496.664 | 1398.678 | 1594.650                         | 1674.625 |
| E  | 15    | 1821.679                         | 1804.652 | 1625.707 | 1527.721 | 1723.693                         | 1803.668 |
| K  | 16    | 1949.773                         | 1932.747 | 1753.802 | 1655.816 | 1851.788                         | 1931.763 |
| L  | 17    | 2062.858                         | 2045.831 | 1866.886 | 1768.900 | 1964.872                         | 2044.847 |
| F  | 18    | 2209.926                         | 2192.899 | 2013.954 | 1915.968 | 2111.940                         | 2191.915 |
| Q  | 19    | 2337.985                         | 2320.958 | 2142.013 | 2044.027 | 2239.999                         | 2319.974 |
| R  | 20    | -                                | -        | -        | -        | -                                | -        |

### C-terminal ions

| AA | C-ion | y                                    | y*       | y-196                                | y-294    | y-98                                     | yo       |
|----|-------|--------------------------------------|----------|--------------------------------------|----------|------------------------------------------|----------|
| L  | 20    | -                                    | -        | -                                    | -        | -                                        | -        |
| A  | 19    | 2399.012                             | 2381.986 | 2203.040                             | 2105.054 | 2301.026                                 | 2381.002 |
| s  | 18    | 2327.975                             | 2310.949 | 2132.003                             | 2034.017 | 2229.989                                 | 2309.964 |
| F  | 17    | 2160.977                             | 2143.950 | 1965.005                             | -        | 2062.991                                 | 2142.966 |
| S  | 16    | 2013.908                             | 1996.882 | 1817.937                             | -        | 1915.922                                 | 1995.898 |
| F  | 15    | 1926.876                             | 1909.850 | 1730.904                             | -        | 1828.890                                 | 1908.866 |
| L  | 14    | 1779.808                             | 1762.781 | 1583.836                             | -        | 1681.822<br>841.415044669496<br>[2+] (8) | 1761.797 |
| P  | 13    | 1666.724<br>1666.72813552082<br>(20) | 1649.697 | 1470.752<br>1470.77166105214<br>(37) | -        | 1568.738<br>1568.74683510991<br>(40)     | 1648.713 |
| Q  | 12    | 1569.671                             | 1552.644 | 1373.699                             | -        | 1471.685                                 | 1551.660 |
| S  | 11    | 1441.612                             | 1424.586 | 1245.641                             | -        | 1343.627<br>1343.6351505328<br>(4)       | 1423.602 |
| s  | 10    | 1354.580                             | 1337.554 | 1158.609<br>1158.61028713913<br>(7)  | -        | 1256.595                                 | 1336.570 |
| L  | 9     | 1187.582                             | 1170.556 | -                                    | -        | 1089.596                                 | 1169.572 |

Figure S3

|   |   |                                         |                                           |   |   |                                     |          |
|---|---|-----------------------------------------|-------------------------------------------|---|---|-------------------------------------|----------|
| - | - | -                                       | -                                         | - | - | 1089.60761154859<br>(12)            | -        |
| S | 8 | 1074.498                                | 1057.471                                  | - | - | 976.512<br>976.516367001958<br>(13) | 1056.487 |
| s | 7 | 987.466<br>494.239412262855<br>[2+] (4) | 970.439                                   | - | - | 889.480<br>889.488540482363<br>(20) | 969.455  |
| E | 6 | 820.468<br>820.468253809435<br>(15)     | 803.441                                   | - | - | -                                   | 802.457  |
| K | 5 | 691.425<br>691.424339792412<br>(16)     | 674.399                                   | - | - | -                                   | 673.414  |
| L | 4 | 563.330<br>563.328552340466<br>(25)     | 546.304                                   | - | - | -                                   | 545.320  |
| F | 3 | 450.246<br>450.244266503683<br>(34)     | 433.219<br>*217.096688080591<br>[2+] (15) | - | - | -                                   | 432.235  |
| Q | 2 | 303.178<br>303.178683154425<br>(10)     | 286.151                                   | - | - | -                                   | 285.167  |
| R | 1 | 175.119<br>175.118636663601<br>(17)     | 158.092                                   | - | - | -                                   | 157.108  |

### Ion distribution

| Threshold | Ion count | Matches | % matched |
|-----------|-----------|---------|-----------|
| 0         | 129       | 27      | 20        |
| 0.5       | 129       | 27      | 20        |
| 1         | 129       | 27      | 20        |
| 2         | 129       | 27      | 20        |
| 3         | 129       | 27      | 20        |
| 4         | 113       | 27      | 23        |
| 5         | 91        | 24      | 26        |
| 10        | 54        | 19      | 35        |

### Observed ions > 1%

| m/z              | Intensity             | % max | Assignment (delta) |
|------------------|-----------------------|-------|--------------------|
| 115.086480820804 | 622.1433 <sub>s</sub> | 15.15 |                    |
| 120.080402043637 | 1675.335 <sub>s</sub> | 40.80 |                    |
| 129.101949042445 | 228.6353 <sub>s</sub> | 5.56  |                    |
| 130.141086798261 | 362.6477 <sub>s</sub> | 8.83  |                    |
| 136.074481044153 | 207.2301 <sub>s</sub> | 5.04  |                    |
| 151.520162050041 | 129.2537 <sub>s</sub> | 3.14  |                    |
| 157.133287185323 | 1490.943 <sub>s</sub> | 36.31 | a2 (-0.00)         |
| 159.090740399527 | 174.754 <sub>s</sub>  | 4.25  |                    |
| 160.07533092322  | 380.9922 <sub>s</sub> | 9.27  |                    |
| 163.729546137367 | 147.9486 <sub>s</sub> | 3.60  |                    |
| 165.10598256474  | 125.799 <sub>s</sub>  | 3.06  |                    |

Figure S3

|                  |           |       |                                  |
|------------------|-----------|-------|----------------------------------|
| 169.260319328271 | 139.5669, | 3.39  |                                  |
| 175.118636663601 | 708.5631, | 17.25 | y1 (-0.00)                       |
| 185.127985070283 | 1073.942, | 26.15 | b2 (-0.00)                       |
| 189.10000453798  | 171.2428, | 4.17  |                                  |
| 198.123619882197 | 607.6479, | 14.79 |                                  |
| 207.112777669348 | 540.7701, | 13.17 |                                  |
| 217.096688080591 | 618.7856, | 15.07 | y3*[2+] (-0.01) : z3[2+] (-0.01) |
| 226.011897460721 | 140.6161, | 3.42  |                                  |
| 226.118333902931 | 2363.376, | 57.56 |                                  |
| 233.164664291274 | 336.6304, | 8.19  |                                  |
| 235.107120314373 | 807.2631, | 19.66 |                                  |
| 254.149968050718 | 1950.642, | 47.50 | b3-98 (0.00)                     |
| 260.139409760326 | 634.9448, | 15.46 |                                  |
| 262.49897390195  | 144.5072, | 3.51  |                                  |
| 286.121514659249 | 164.1084, | 3.99  |                                  |
| 288.134831351107 | 275.8215, | 6.71  |                                  |
| 303.178683154425 | 420.4379, | 10.24 | y2 (0.00)                        |
| 304.128904048143 | 530.0134, | 12.90 |                                  |
| 313.150480693503 | 625.2482, | 15.22 |                                  |
| 330.176320973064 | 246.2573, | 5.99  |                                  |
| 348.19195343307  | 262.1448, | 6.38  |                                  |
| 352.126095233316 | 649.5034, | 15.81 | b3 (-0.00)                       |
| 357.151064140371 | 185.1748, | 4.51  |                                  |
| 364.162281887819 | 526.2432, | 12.81 |                                  |
| 373.223224157046 | 1383.174, | 33.68 |                                  |
| 375.169632801367 | 338.524,  | 8.24  |                                  |
| 382.17148213732  | 469.9827, | 11.44 |                                  |
| 401.218031937405 | 350.7733, | 8.54  | b4-98 (0.00)                     |
| 402.114234471859 | 146.7309, | 3.57  |                                  |
| 423.201761341213 | 579.367,  | 14.11 |                                  |
| 433.186365565489 | 416.4528, | 10.14 |                                  |
| 450.244266503683 | 1402.18,  | 34.15 | y3 (-0.00)                       |
| 451.199843915376 | 991.3551, | 24.14 |                                  |
| 470.239617368218 | 784.5166, | 19.10 |                                  |
| 477.242462240826 | 183.048,  | 4.45  |                                  |
| 479.759934439468 | 197.1762, | 4.80  |                                  |
| 488.24951760832  | 286.7546, | 6.98  | b5-98 (0.00)                     |
| 494.239412262855 | 165.5757, | 4.03  | y7[2+] (0.00)                    |
| 495.258526799137 | 641.1547, | 15.61 |                                  |
| 504.222713669824 | 273.2846, | 6.65  |                                  |
| 521.668963857833 | 139.8686, | 3.40  |                                  |
| 522.237478382682 | 195.3264, | 4.75  | a9[2+] (-0.01)                   |
| 536.28664110993  | 736.7483, | 17.94 |                                  |

Figure S3

|                  |           |       |                    |
|------------------|-----------|-------|--------------------|
| 548.832134545499 | 152.5863, | 3.71  |                    |
| 563.328552340466 | 1031.771, | 25.12 | y4 (-0.00)         |
| 564.280732774695 | 1281.054, | 31.20 |                    |
| 589.308727646618 | 322.1092, | 7.84  |                    |
| 599.326350390134 | 158.4441, | 3.85  |                    |
| 607.323210689886 | 1030.289, | 25.09 |                    |
| 614.326082970576 | 409.9028, | 9.98  |                    |
| 617.308267853442 | 667.5524, | 16.25 |                    |
| 635.31681567314  | 3009.225, | 73.29 | b6-98 (0.00)       |
| 644.590245487522 | 139.8018, | 3.40  |                    |
| 654.796693368156 | 199.0289, | 4.84  |                    |
| 667.012454898479 | 463.8052, | 11.29 |                    |
| 672.344779430786 | 205.669,  | 5.00  |                    |
| 691.424339792412 | 677.8307, | 16.50 | y5 (-0.00)         |
| 693.655635364186 | 149.1974, | 3.63  |                    |
| 709.366475360465 | 395.8629, | 9.64  |                    |
| 711.877051175271 | 170.435,  | 4.15  |                    |
| 712.368755445476 | 435.3008, | 10.60 |                    |
| 719.333964983733 | 222.5768, | 5.42  |                    |
| 730.395318604563 | 428.6717, | 10.44 |                    |
| 731.260655565435 | 197.0375, | 4.79  |                    |
| 748.401767107408 | 992.6113, | 24.17 | b7-98 (0.00)       |
| 750.310149905696 | 226.7974, | 5.52  | c6 (-0.01)         |
| 758.849765029345 | 276.5911, | 6.73  |                    |
| 766.872784561531 | 209.1769, | 5.09  |                    |
| 770.380570848054 | 216.3179, | 5.26  |                    |
| 774.417262288684 | 197.9304, | 4.82  |                    |
| 794.371509581576 | 171.2828, | 4.17  |                    |
| 820.468253809435 | 644.6912, | 15.70 | y6 (0.00)          |
| 838.003622141148 | 286.8811, | 6.98  |                    |
| 838.490706448835 | 607.1793, | 14.78 |                    |
| 841.415044669496 | 355.8518, | 8.66  | y14-98[2+] (-9.53) |
| 889.488540482363 | 827.569,  | 20.15 | y7-98 (0.00)       |
| 941.484423265577 | 224.3257, | 5.46  |                    |
| 949.457881446895 | 268.056,  | 6.52  |                    |
| 949.921483641343 | 156.1527, | 3.80  |                    |
| 958.510632082482 | 2383.28,  | 58.04 |                    |
| 976.516367001958 | 544.449,  | 13.26 | y8-98 (0.00)       |
| 977.536048177668 | 373.4191, | 9.09  |                    |
| 1007.9828788406  | 198.6952, | 4.83  |                    |
| 1082.7972228078  | 359.4011, | 8.75  |                    |
| 1089.60761154859 | 524.6043, | 12.77 | y9-98 (0.01)       |
| 1121.60644080603 | 183.1289, | 4.46  |                    |

Figure S3

|                  |           |       |                |
|------------------|-----------|-------|----------------|
| 1140.66469731777 | 249.3321, | 6.07  |                |
| 1141.60550735998 | 353.3557, | 8.60  |                |
| 1158.61028713913 | 305.033,  | 7.42  | y10-196 (0.00) |
| 1159.64316702849 | 198.7959, | 4.84  |                |
| 1167.42921090871 | 180.5409, | 4.39  |                |
| 1193.67427759038 | 169.1491, | 4.11  |                |
| 1210.63168520998 | 204.3067, | 4.97  |                |
| 1211.60899919745 | 198.0866, | 4.82  |                |
| 1227.64355635021 | 1089.793, | 26.54 |                |
| 1245.66856117944 | 497.6163, | 12.11 |                |
| 1246.69067834453 | 225.2937, | 5.48  |                |
| 1308.6032807395  | 414.0063, | 10.08 |                |
| 1309.58396580644 | 268.5123, | 6.53  |                |
| 1325.60327900402 | 197.2018, | 4.80  |                |
| 1330.94984335853 | 152.1884, | 3.70  |                |
| 1343.6351505328  | 192.6155, | 4.69  | y11-98 (0.00)  |
| 1434.74552317685 | 1823.894, | 44.42 |                |
| 1452.76047263653 | 4105.77,  | 100   |                |
| 1470.77166105214 | 1526.216, | 37.17 | y13-196 (0.01) |
| 1471.76558743869 | 356.5122, | 8.68  |                |
| 1488.76909949956 | 220.3363, | 5.36  |                |
| 1525.74884394765 | 154.8456, | 3.77  |                |
| 1533.71406226352 | 260.1852, | 6.33  |                |
| 1550.70614943227 | 288.1833, | 7.01  |                |
| 1550.73199749264 | 3707.406, | 90.29 |                |
| 1551.74720401062 | 240.8931, | 5.86  |                |
| 1565.84586921423 | 445.4182, | 10.84 |                |
| 1568.71830089248 | 411.129,  | 10.01 |                |
| 1568.74683510991 | 1662.965, | 40.50 | y13-98 (0.00)  |
| 1663.81437523561 | 459.253,  | 11.18 |                |
| 1666.72813552082 | 853.3339, | 20.78 | y13 (0.00)     |
| 1672.59290642457 | 375.5474, | 9.14  |                |

Figure S3

**Figure S3. Interpretation of MS2 spectra matching phosphorylated peptides of 5-HT<sub>2A</sub> receptor.** MS2 spectra matching phosphorylated peptides were inspected using the Prohossi software (17) for automatic annotation (in red) of unique transitions that pinpoint the position of phosphorylated sites. For each phosphorylated peptide an annotated MS/MS spectrum is illustrated along with a table of fragment ion matches and a table summarizing the data for phosphorylation site assignment.
