# Supplementary material
Source: PubMed Central journal article supplement (PMC4014284)
Supplement: supp_M113.036558_mcp.M113.036558-4.pdf [file supp_M113.036558_mcp.M113.036558-4.pdf]

K.LAsFSFLPQSSLSSEK.L  
+ Phospho (ST)

K.LAsFSFLPQSSLSSEK.L  
+ 2 Phospho (ST)

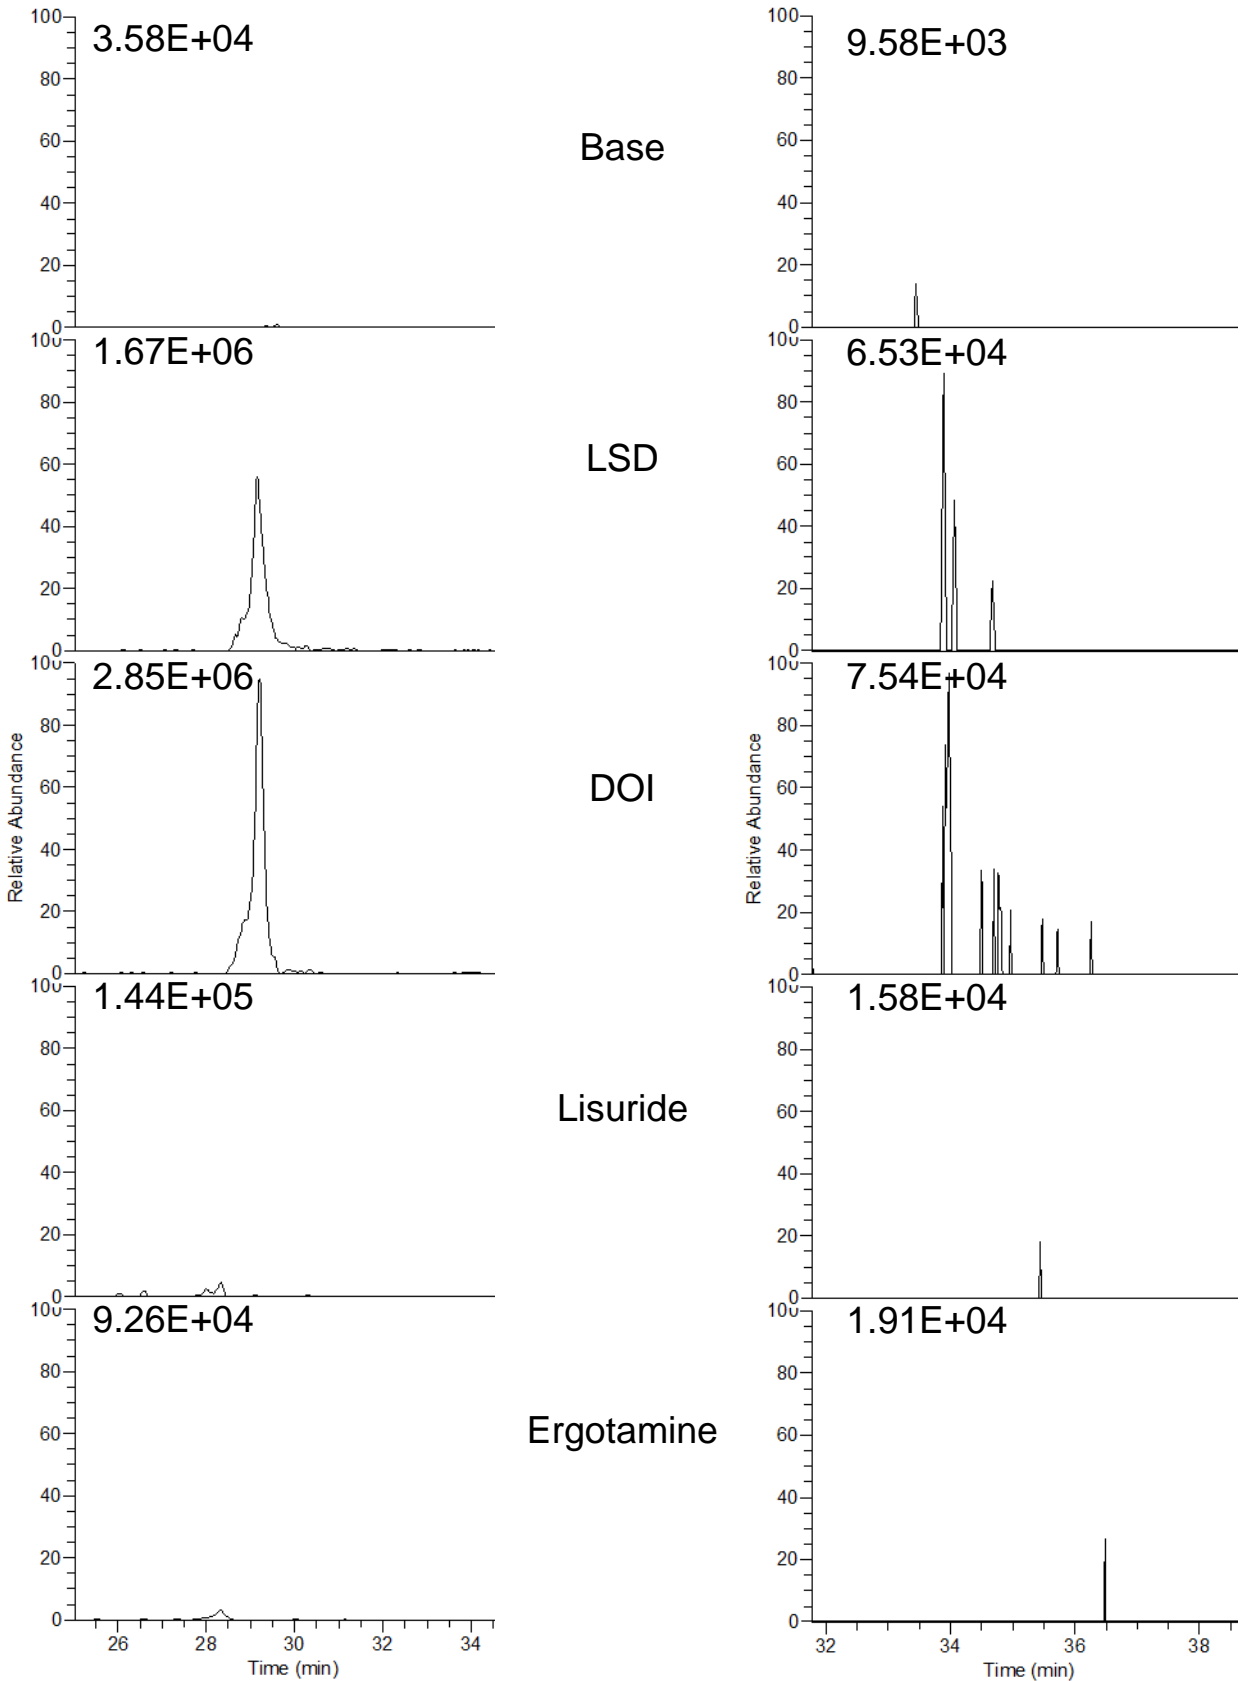

Figure S4

K.LAsFSFLPQSSLsEKLFQR.S and  
K.LAsFSFLPQSSLsEKLFQR.S  
+ 2 Phospho (ST)

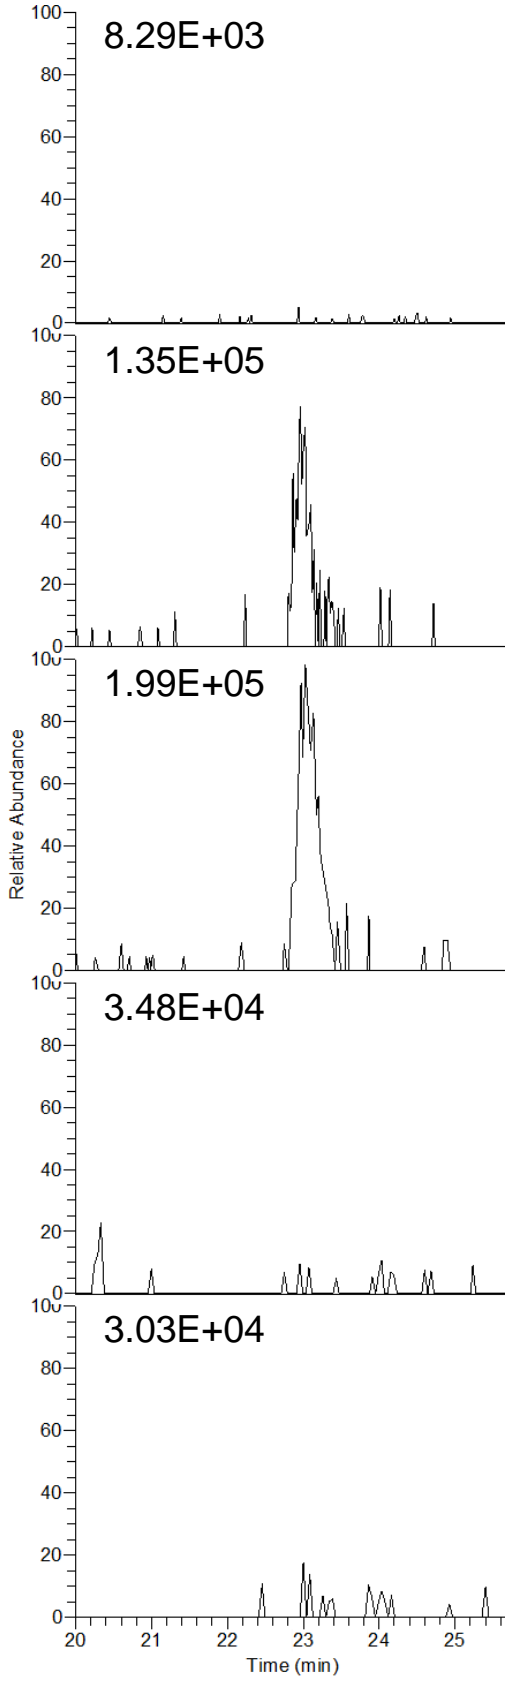

K.LAsFSFLPQSSLsEKLFQR.S  
+ 3 Phospho (ST)

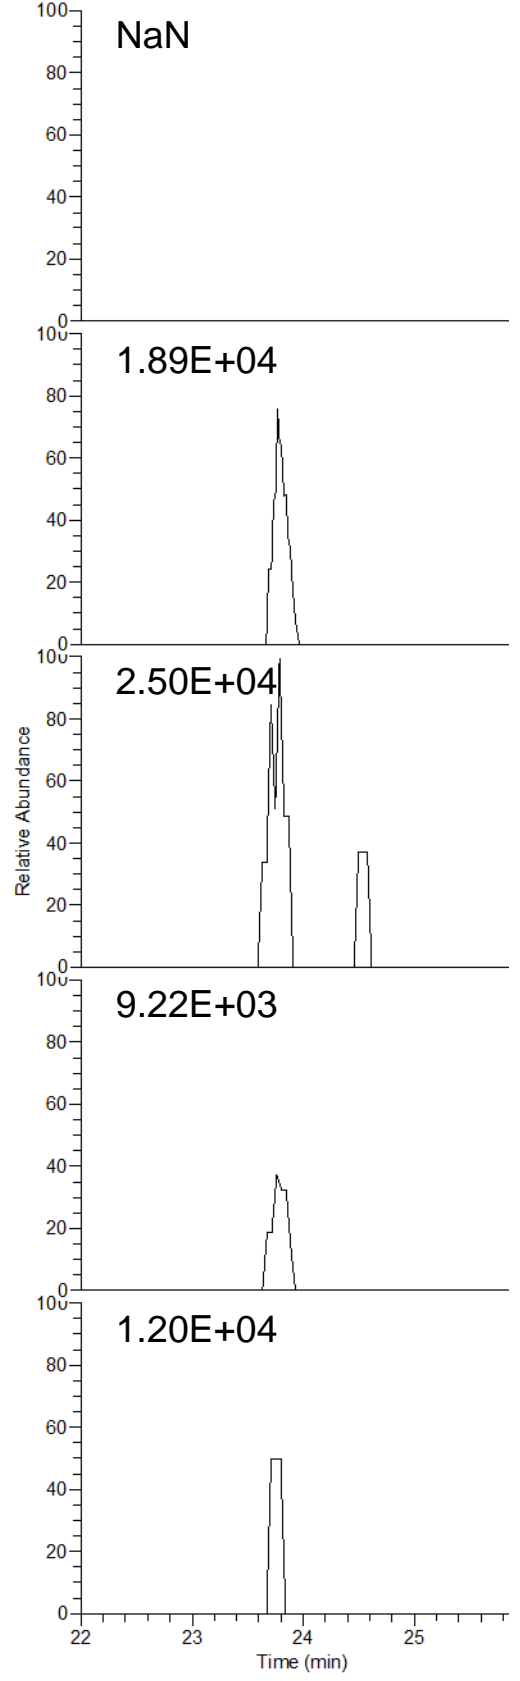

Figure S4

R.sIHREPGSYTGR.R  
+ Phospho (ST)

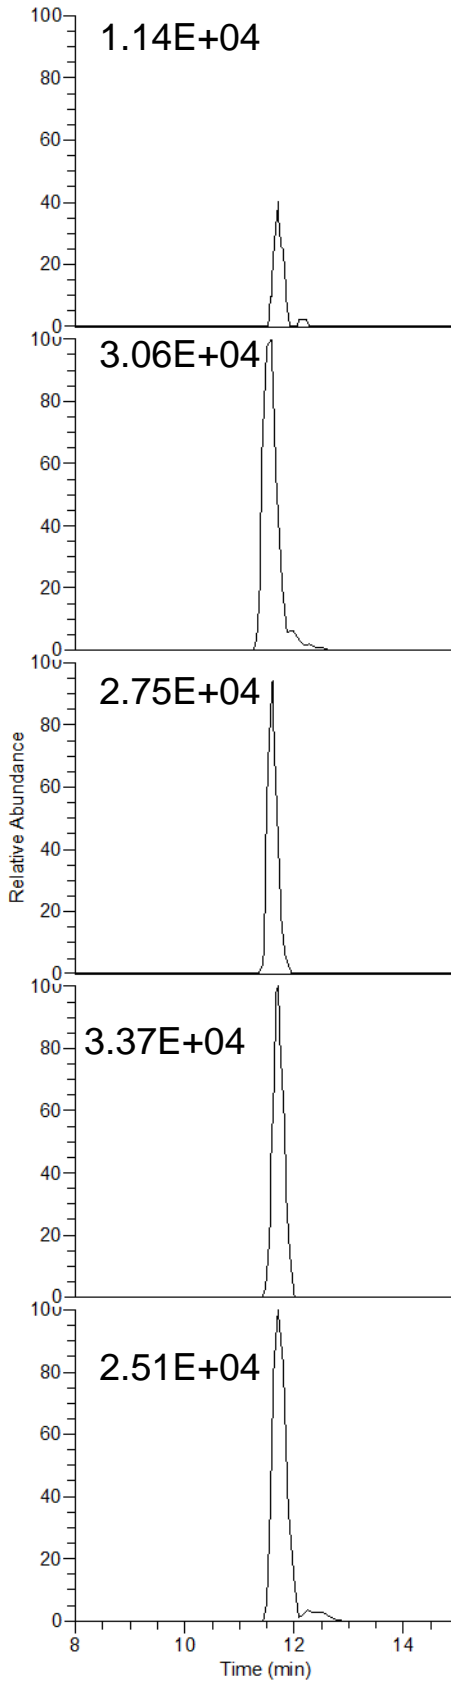

R.sIHREPGsYTGRR.T  
+ 2 Phospho (ST)

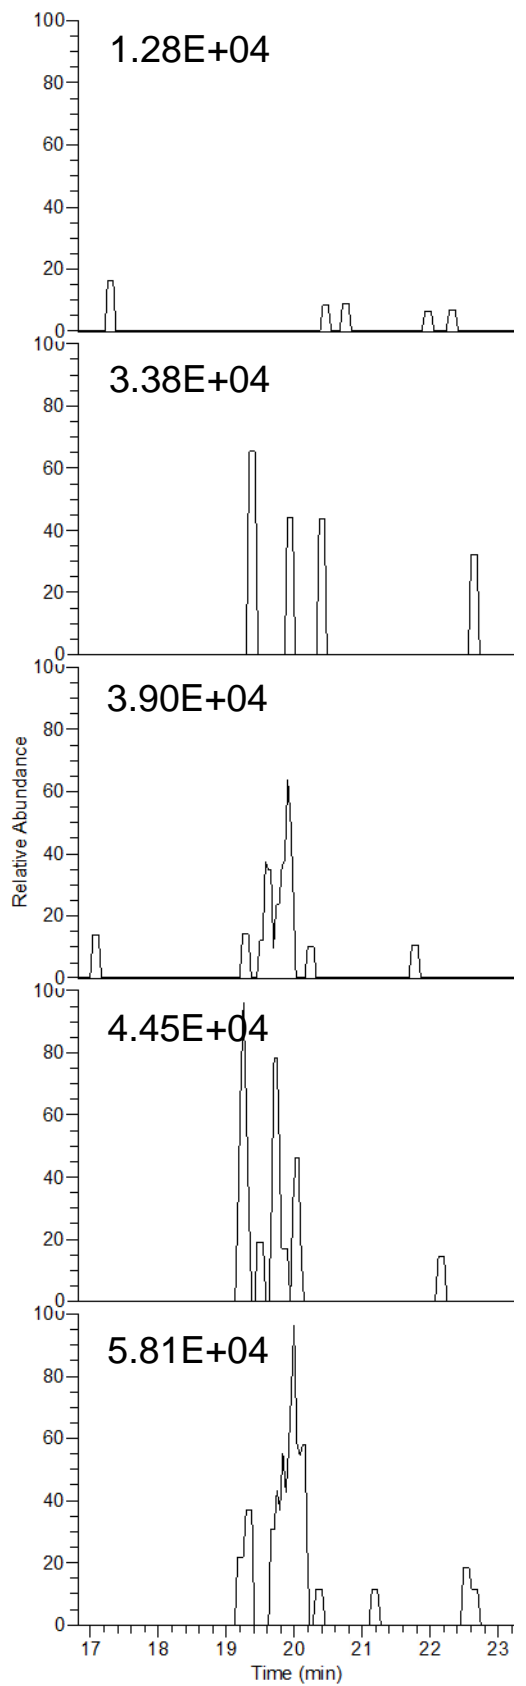

Figure S4

R.SIHREPGSYTGR.R

K.LASFSFLPQSSLSSEK.L

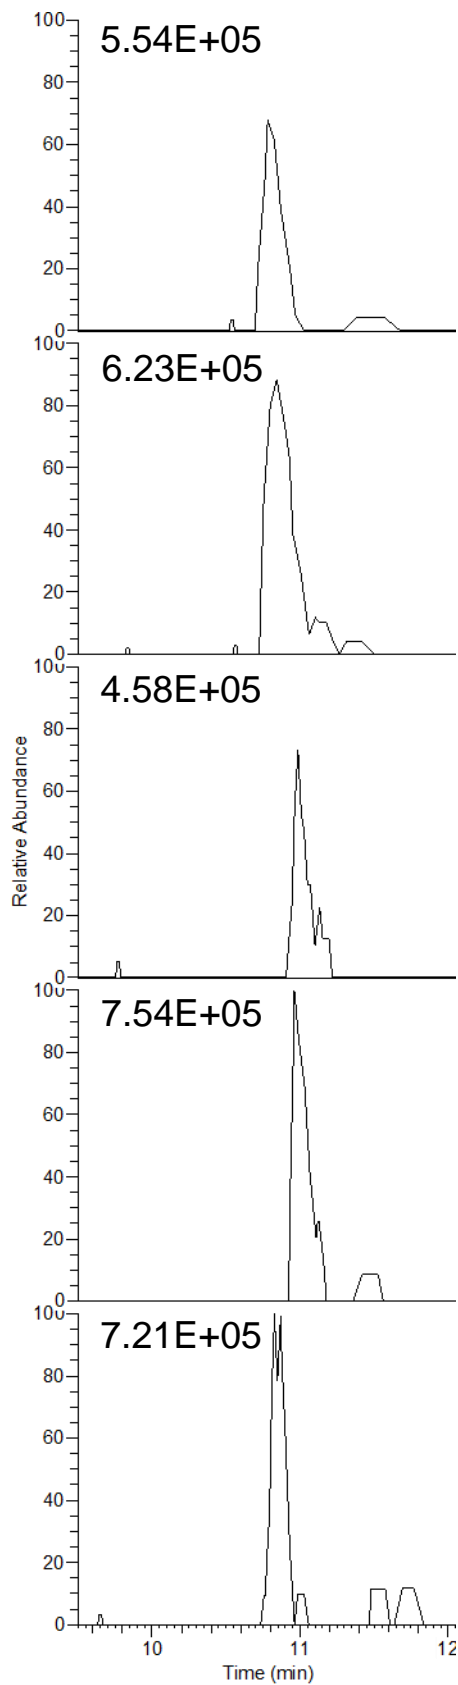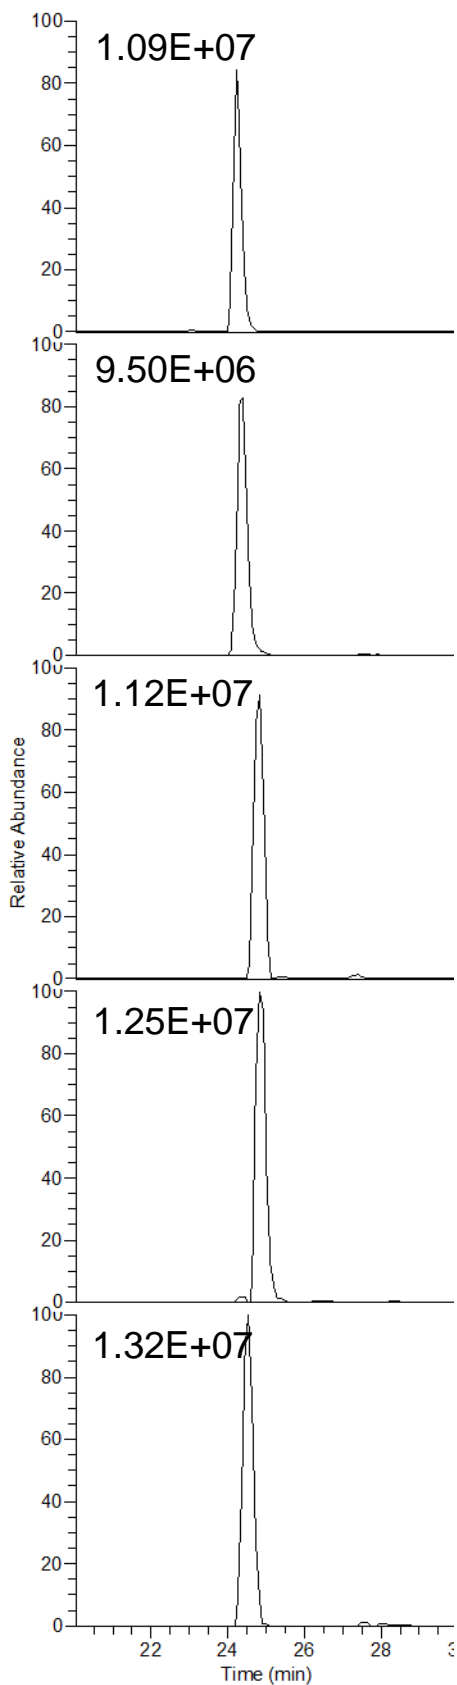

Figure S4

**Figure S4. Extracted ion chromatograms of the phosphorylated peptides identified in the 5-HT<sub>2A</sub> receptor sequence.** Cell treatments correspond to those described in the legend to Figure 1B. The illustrated chromatograms are representative of three independent experiments. Intensity values indicated in the upper left corner of each extracted ion chromatogram correspond to the observed maximal intensity.
