# Supplementary material
Source: PubMed Central journal article supplement (PMC4014284)
Supplement: supp_M113.036558_mcp.M113.036558-5.pdf [file supp_M113.036558_mcp.M113.036558-5.pdf]

Anti-phospho-Ser<sup>280</sup> 5-HT<sub>2A</sub>R Western

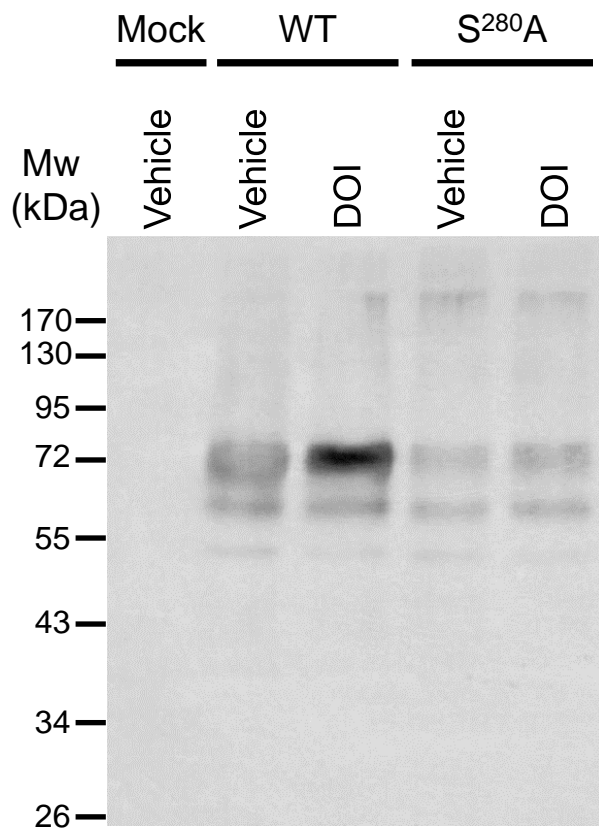

Figure S5

**Figure S5. Validation of the phospho-Ser<sup>280</sup> 5-HT<sub>2A</sub> receptor antibody in HEK-293 cells transiently expressing HA-5-HT<sub>2A</sub> receptors.** HEK-293 cells expressing or not (Mock) WT or S<sup>280</sup>A HA-5-HT<sub>2A</sub> receptors were exposed to vehicle or DOI (1 μM) for 15 min. A full picture of a blotted gel treated with the antibody generated against phospho-Ser<sup>280</sup> (1:300 dilution) is illustrated.
