# Supplementary material
Source: PubMed Central journal article supplement (PMC4014284)
Supplement: supp_M113.036558_mcp.M113.036558-6.pdf [file supp_M113.036558_mcp.M113.036558-6.pdf]

Table S1

| Accessions                                                                                        | Leading Protein Name                                             | Modified Sequence                         | Median Ratio M/L | Median Ratio H/L | Median Ratio H/M | Ratio M/L Biological Variability [%] | Ratio H/L Biological Variability [%] | Ratio H/M Biological Variability [%] | Significance counts M/L | Significance counts H/L | Significance counts H/M | Charge | m/z      | Mass Error [ppm] | Localization Prob | Score  |        |
|---------------------------------------------------------------------------------------------------|------------------------------------------------------------------|-------------------------------------------|------------------|------------------|------------------|--------------------------------------|--------------------------------------|--------------------------------------|-------------------------|-------------------------|-------------------------|--------|----------|------------------|-------------------|--------|--------|
| P28223;F5GW68                                                                                     | 5HT2A 5-hydroxytryptamine receptor 2A                            | IAS(ph)FSFIPQSS(ph)ISS(ph)EKIFQR          | 1.04             | 2.96             | 4.70             | 29.97                                | 23.67                                | 27.83                                | 0                       | 3                       | 3                       | 2      | 1256.552 | 0.30             | 0.80              | 211.06 |        |
| Q72392;B7WNP8;D6RHE5                                                                              | TPC11 Trafficking protein particle complex subunit 11            | IEITS(ph)VDAIAGNET(ph)GR                  | 1.02             | 37.16            | 42.86            | 22.19                                | 18.39                                | 37.19                                | 0                       | 3                       | 3                       | 3      | 616.611  | 0.04             | 0.97              | 84.21  |        |
| Q9Y4A5;F222U4;HOY4W2                                                                              | TRRAP Transformation/transcription domain-associated protein     | QAMHS(ph)IQVIAQVT(ph)GK                   | 9.87             | 171.15           | 20.38            | 70.05                                | 45.66                                | 117.29                               | 2                       | 2                       | 2                       | 2      | 885.904  | 0.77             | 1.00              | 88.10  |        |
| P29590;F8W9X2                                                                                     | PML Protein PML                                                  | S(ph)PVIGSEVFIPNSNHVAGAGEAEEER            | 0.42             | 0.26             | 0.62             | 9.05                                 | 34.68                                | 32.86                                | 2                       | 2                       | 2                       | 3      | 911.755  | 0.15             | 1.00              | 84.68  |        |
| Q723C6                                                                                            | ATG9A Autophagy-related protein 9A                               | HPEPVPEEGS(ph)EDEIPPVQHKV                 | 0.80             | 0.37             | 0.42             | 38.20                                | 66.15                                | 96.15                                | 0                       | 2                       | 2                       | 2      | 3        | 810.372          | 0.29              | 1.00   | 157.54 |
| B3KTC7;P49959;F8W7U8                                                                              | B3KTC7 MRE11 meiotic recombination 11 homolog A (S. cerevisiae)  | GVDFES(ph)SEDDDDPFMNTSIRR                 | 0.82             | 1.41             | 1.71             | 46.59                                | 63.83                                | 112.71                               | 0                       | 2                       | 2                       | 3      | 905.357  | -0.13            | 0.89              | 243.72 |        |
| Q8N9T8;D3YTE0                                                                                     | KRI1 Protein KRI1 homolog                                        | QIPAIIDGIMGPES(ph)PPAQEEAPVS(ph)PHKKPAPQK | 0.59             | 0.63             | 0.58             | 57.53                                | 60.42                                | 280.88                               | 2                       | 1                       | 2                       | 4      | 930.940  | -0.30            | 0.99              | 70.99  |        |
| Q5VY93;Q29274                                                                                     | Q5VY93 Rho/Rac guanine nucleotide exchange factor (GEF) 2        | IQDSSDPDT(ph)GSEEE GSSRS(ph)PPHS(ph)PR    | 0.75             | 2.27             | 2.95             | 22.90                                | 43.65                                | 60.67                                | 0                       | 1                       | 2                       | 3      | 1003.051 | -0.51            | 0.95              | 90.73  |        |
| Q43719;E9FPF2                                                                                     | HTSF1 HIV Tat-specific factor 1                                  | VIDEEGS(ph)ERFDEDS(ph)DEKEEEDTYEK         | 0.81             | 0.81             | 0.62             | 7.49                                 | 10.02                                | 10.43                                | 0                       | 1                       | 2                       | 3      | 1147.426 | 0.52             | 1.00              | 111.77 |        |
| Q14978                                                                                            | NOLC1 Nucleolar and coiled-body phosphoprotein 1                 | IQT(ph)PNT(ph)FPK                         | 0.85             | 1.38             | 1.82             | 16.84                                | 13.07                                | 17.25                                | 0                       | 1                       | 2                       | 2      | 603.254  | 0.39             | 1.00              | 137.84 |        |
| Q96G66;E5RFB8                                                                                     | SRRC2 Scavenger receptor class F member 2                        | APS(ph)PPPPGSEAAP(s)ph)PSKR               | 0.55             | 0.22             | 0.48             | 38.07                                | 74.61                                | 54.58                                | 0                       | 1                       | 2                       | 3      | 630.611  | -0.17            | 0.50              | 104.89 |        |
| E9PKC0;Q6IQ23;HOYDE2                                                                              | E9PKC0 Pleckstrin homology domain containing, family A member 7  | KVTS(ph)PIQS(ph)PTK                       | 0.90             | 1.74             | 2.11             | 25.31                                | 45.75                                | 33.22                                | 0                       | 1                       | 2                       | 2      | 673.312  | 0.27             | 0.99              | 173.19 |        |
| Q96T58                                                                                            | MINT Msx2-interacting protein                                    | IS(ph)PPVASGGIPHQS(ph)PPTK                | 0.43             | 0.35             | 0.59             | 24.15                                | 75.39                                | 167.91                               | 0                       | 1                       | 2                       | 2      | 965.447  | -0.83            | 1.00              | 126.91 |        |
| C9JEE1;Q724V5;E9PGW4                                                                              | C9JEE1 Uncharacterized protein                                   | GSGGS(ph)S(ph)GDEIREDEPVKK                | 2.16             | 1.29             | 0.63             | 89.48                                | 19.72                                | 79.46                                | 2                       | 0                       | 2                       | 2      | 1061.422 | -0.14            | 0.93              | 209.85 |        |
| E7EUC7;C9JKD6;Q16851;C9JNZ1;C9JVG3;C9KOU9;C9JWG0;C9JLW1;C9JTZ5;C9JVV7;F223H1;F8WC70;F223P4;C9J3M0 | E7EUC7 UDP-glucose pyrophosphorylase 2                           | (ac)S(ph)QDGASQFQIEVR                     | 0.98             | 1.41             | 1.52             | 38.66                                | 35.60                                | 71.31                                | 1                       | 0                       | 2                       | 2      | 793.846  | 0.30             | 1.00              | 180.84 |        |
| Q0IRZ9;E9PG79                                                                                     | FCHO2 FCH domain only protein 2                                  | VSGNIT(ph)JSPAIS(ph)RHSPVQM(ox)NRR        | 1.82             | 0.86             | 0.63             | 2.93                                 | 30.48                                | 14.74                                | 1                       | 0                       | 2                       | 3      | 851.740  | 0.51             | 0.50              | 128.06 |        |
| Q96JM3                                                                                            | CHAP1 Chromosome alignment-maintaining phosphoprotein 1          | RPAPAVS(ph)PGSWKPGPPGS(ph)PR              | 0.76             | 0.35             | 0.76             | 47.30                                | 64.46                                | 66.33                                | 1                       | 3                       | 1                       | 3      | 720.005  | 0.04             | 1.00              | 115.39 |        |
| P28223;F5GW68                                                                                     | 5HT2A 5-hydroxytryptamine receptor 2A                            | S(ph)IHREPSYTYGR                          | 2.03             | 0.51             | 0.74             | 104.66                               | 139.03                               | 76.41                                | 3                       | 2                       | 1                       | 3      | 480.552  | -0.17            | 0.98              | 85.55  |        |
| Q9H5H4;C9JH27;Y7                                                                                  | ZN768 Zinc finger protein 768                                    | SPGIVPPS(ph)PEFAPR                        | 0.69             | 0.53             | 0.79             | 9.20                                 | 8.99                                 | 6.61                                 | 1                       | 2                       | 1                       | 2      | 765.871  | 0.05             | 1.00              | 162.37 |        |
| B5MC40;Q86YP4;C9JUK9;C9JHD7;C9JGN4;C9JIM3                                                         | B5MC40 GATA zinc finger domain containing 2A                     | RPPS(ph)PDIVIS(ph)DNEQPS(ph)SPR           | 0.57             | 0.51             | 0.84             | 17.90                                | 44.12                                | 38.33                                | 1                       | 2                       | 1                       | 2      | 3        | 810.676          | -0.12             | 1.00   | 201.12 |
| Q9UQ35;F5GWZ7                                                                                     | SRRM2 Serine/arginine repetitive matrix protein 2                | VKAOT(ph)PPGSPSGSKS(ph)PCPOEK             | 1.03             | 0.98             | 1.34             | 35.53                                | 26.13                                | 14.57                                | 1                       | 2                       | 1                       | 3      | 814.037  | 0.07             | 1.00              | 181.87 |        |
| Q9NYZ3                                                                                            | GTSE1 G2 and 5 phase-expressed protein 1                         | IVDVS(ph)PDRSGS(ph)PPSRVQAINFSPESDSTFSK   | 0.59             | 0.74             | 1.61             | 9.45                                 | 24.94                                | 67.19                                | 0                       | 2                       | 1                       | 3      | 1202.545 | 0.19             | 0.80              | 94.20  |        |
| DOUFD1;C9J502;DOUFD3;P55327;ESRKB4;D3YTI0;ESRKS3;F5H0B0                                           | DOUFD1 Prostate leucine zipper variant 1                         | NSPTFKS(ph)FEKVENIK                       | 1.31             | 2.08             | 1.87             | 16.05                                | 32.69                                | 65.98                                | 0                       | 2                       | 1                       | 3      | 659.650  | -0.01            | 0.97              | 73.21  |        |
| P07948;ESR137                                                                                     | LYN Tyrosine-protein kinase LYN                                  | GKDSIS(ph)DDGVDIK                         | 1.20             | 1.98             | 2.00             | 26.23                                | 44.67                                | 39.50                                | 0                       | 2                       | 1                       | 2      | 714.816  | -0.18            | 1.00              | 208.15 |        |
| Q5SYE7                                                                                            | NHSL1 NHS-like protein 1                                         | NHSL(ph)PS(ph)PPVPTGGAAPSASP              | 0.55             | 0.24             | 0.43             | 24.34                                | 59.42                                | 68.63                                | 0                       | 2                       | 1                       | 3      | 724.996  | 0.00             | 1.00              | 123.60 |        |
| Q9UN36;B4DE86;G3V3N4;HOYIT9;G3V578;HOYJ57                                                         | NDRG2 Protein NDRG2                                              | TAS(ph)ITSAAS(ph)VDGNNR                   | 1.29             | 1.55             | 1.09             | 23.54                                | 21.26                                | 47.33                                | 0                       | 2                       | 1                       | 2      | 755.303  | -0.07            | 0.99              | 233.49 |        |
| P06400;F5HG61                                                                                     | RB Retinoblastoma-associated protein                             | IPGGNIVIS(ph)PIKS(ph)PKYSEGIPTTK          | 0.91             | 0.37             | 0.79             | 28.62                                | 21.16                                | 42.27                                | 0                       | 1                       | 3                       | 3      | 977.495  | 0.50             | 0.99              | 169.64 |        |
| Q43683;F5GXIS;E9PC26;F5GZ80                                                                       | BUB1 Mitotic checkpoint serine/threonine-protein kinase BUB1     | DGKFS(ph)PIQEKs(ph)PK                     | 1.04             | 0.58             | 0.49             | 145.58                               | 90.19                                | 21.98                                | 2                       | 1                       | 2                       | 2      | 810.857  | 1.44             | 1.00              | 114.27 |        |
| B057P1;HOY5T9;HOY6K2;P25440;F8VXF8;Q658Y7;BOV073;HOY602;BOV072;E9PIQ3;HOYDJ7                      | B057P1 Bromodomain containing 2                                  | KADTTTPTTAAIAPGSPAS(ph)PPGSIIEPK          | 0.45             | 0.70             | 0.93             | 36.11                                | 33.23                                | 40.17                                | 2                       | 1                       | 1                       | 3      | 928.135  | -0.01            | 0.72              | 142.79 |        |
| P13796;Q5TBN3;Q5TBN5                                                                              | PLS1 Plastin-2                                                   | GS(ph)VSDEEMM(ox)EIR                      | 1.33             | 0.68             | 0.58             | 52.47                                | 18.82                                | 55.07                                | 2                       | 0                       | 1                       | 2      | 739.781  | -0.04            | 0.93              | 153.63 |        |
| Q9NTJ3;E9PD53;C9JRH3;E7ET04;C9JUE4;C9JYK2;C9JWFO;F8WC87                                           | SMC4 Structural maintenance of chromosomes protein 4             | RREGPPPPS(ph)PDGAS(ph)SDAEPEPPSPGR        | 0.16             | 1.20             | 0.66             | 60.69                                | 11.35                                | 35.65                                | 2                       | 0                       | 1                       | 3      | 944.394  | -0.12            | 1.00              | 142.40 |        |
| P22314;E7ERL1;B4DDE4;Q5JRR6                                                                       | UBA1 Ubiquitin-like modifier-activating enzyme 1                 | IHVSI(ph)DQEIQSANASVSDRSIEIEK             | 1.40             | 1.80             | 1.16             | 24.84                                | 9.22                                 | 16.63                                | 0                       | 3                       | 0                       | 3      | 921.766  | 0.65             | 1.00              | 119.48 |        |
| Q43823;B7Z8L8                                                                                     | AKAP8 A-kinase anchor protein 8                                  | S(ph)GDDEFKGEDEICDSGR                     | 0.65             | 0.43             | 0.66             | 86.13                                | 121.89                               | 31.60                                | 2                       | 2                       | 0                       | 2      | 1005.375 | 0.19             | 1.00              | 176.49 |        |
| D6RGX4                                                                                            | D6RGX4 Uncharacterized protein                                   | GSAIAS(ph)IS(ph)PIR                       | 0.08             | 0.10             | 1.36             | 29.21                                | 57.44                                | 26.93                                | 2                       | 2                       | 0                       | 2      | 616.278  | 0.14             | 1.00              | 74.99  |        |
| Q07955                                                                                            | SRSF1 Serine/arginine-rich splicing factor 1                     | SRGS(ph)PRYS(ph)PR                        | 0.55             | 0.55             | 0.93             | 125.07                               | 121.91                               | 17.80                                | 2                       | 2                       | 0                       | 2      | 661.774  | 0.03             | 0.81              | 64.22  |        |
| Q9UQ35;F5GWZ7                                                                                     | SRRM2 Serine/arginine repetitive matrix protein 2                | S(ph)TRPPASQSR                            | 1.14             | 1.36             | 1.03             | 8.32                                 | 15.01                                | 4.17                                 | 1                       | 2                       | 0                       | 3      | 450.877  | 0.30             | 0.33              | 103.14 |        |
| Q5JWU6;Q5U0E0;Q43399;B4DPJ6                                                                       | Q5JWU6 Tumor protein D52-like 2                                  | NSATFKS(ph)FDR                            | 2.00             | 1.96             | 1.16             | 20.33                                | 9.46                                 | 20.28                                | 1                       | 2                       | 0                       | 2      | 691.293  | 0.25             | 1.00              | 189.24 |        |
| Q14654                                                                                            | IRS4 Insulin receptor substrate 4                                | VPRPREDIS(ph)DNDDDDTHVR                   | 0.88             | 0.62             | 0.80             | 62.80                                | 49.14                                | 22.12                                | 1                       | 2                       | 0                       | 3      | 777.000  | -0.98            | 1.00              | 98.17  |        |
| Q6VY07;B4DF77                                                                                     | PACS1 Phosphofurin acidic cluster sorting protein 1              | TNSS(ph)DSERS(ph)PDIGHSTQIPR              | 0.66             | 1.25             | 1.04             | 58.37                                | 65.69                                | 9.43                                 | 1                       | 2                       | 0                       | 3      | 781.992  | -0.41            | 0.84              | 134.32 |        |
| Q9UQ35                                                                                            | SRRM2 Serine/arginine repetitive matrix protein 2                | HGGSPQIATTPISEPVPVNPSEAS(ph)PTR           | 0.75             | 0.61             | 0.91             | 64.39                                | 60.45                                | 44.07                                | 1                       | 2                       | 0                       | 3      | 978.133  | -0.30            | 0.81              | 250.18 |        |
| Q13523;F5H2U2                                                                                     | PRP4B Serine/threonine-protein kinase PRP4 homolog               | KS(ph)S(ph)PTIR                           | 1.23             | 1.73             | 1.35             | 29.57                                | 28.23                                | 20.32                                | 0                       | 2                       | 0                       | 2      | 538.749  | -0.25            | 0.50              | 101.38 |        |
| Q86U06;E7EU28                                                                                     | RBM23 Probable RNA-binding protein 23                            | EKS(ph)PVREVDNISPEER                      | 0.56             | 0.34             | 0.65             | 11.31                                | 29.98                                | 17.48                                | 0                       | 2                       | 0                       | 3      | 687.660  | -0.36            | 0.98              | 56.53  |        |
| P46821                                                                                            | MAP1B Microtubule-associated protein 1B                          | TTKS(ph)PSDSGYSYETIGK                     | 1.43             | 1.81             | 1.26             | 18.65                                | 32.62                                | 15.50                                | 0                       | 2                       | 0                       | 2      | 950.914  | 0.50             | 0.99              | 244.32 |        |
| Q15121;B1AKZ5                                                                                     | PEA15 Astrocytic phosphoprotein PEA-15                           | YKDIIRQPS(ph)EEIEIK                       | 1.47             | 1.64             | 1.25             | 17.47                                | 19.14                                | 17.09                                | 0                       | 2                       | 0                       | 2      | 970.990  | 0.01             | 1.00              | 76.07  |        |
| Q96B36                                                                                            | AKT51 Proline-rich AKT1 substrate 1                              | AATAARPPAPPAPQPPS(ph)PTPS(ph)PPRPTIAR     | 0.40             | 0.48             | 1.12             | 64.50                                | 67.26                                | 16.59                                | 3                       | 1                       | 0                       | 3      | 1042.188 | 0.76             | 0.98              | 146.76 |        |
| Q9B7C0                                                                                            | DIDO1 Death-inducer obliterator 1                                | YPCISADAAVSTT(ph)PPGS(ph)PPPPPIPEPVVK     | 0.51             | 0.61             | 1.33             | 27.65                                | 15.99                                | 43.02                                | 2                       | 1                       | 0                       | 3      | 1103.857 | 0.06             | 0.78              | 133.58 |        |
| Q8N707;Q14247;Q96H99;B4E358;HOYCD9;HOYEV2                                                         | Q8N707 CTTN protein                                              | GPVSGTEPEPVYS(ph)MGAADYR                  | 0.41             | 0.60             | 1.41             | 10.37                                | 16.37                                | 17.25                                | 2                       | 1                       | 0                       | 2      | 1117.969 | -0.08            | 1.00              | 288.92 |        |
| P18887;F5H8D7                                                                                     | XRCC1 DNA repair protein XRCC1                                   | TKPTQAAGPSS(ph)PQKPTT(ph)PEETK            | 0.51             | 0.51             | 1.06             | 45.47                                | 40.53                                | 7.33                                 | 2                       | 1                       | 0                       | 3      | 813.400  | 0.29             | 0.95              | 136.43 |        |
| Q9H2G4                                                                                            | TSYL2 Testis-specific Y-encoded-like protein 2                   | RS(ph)SSES(ph)PQRDPVPPPPPPPIIR            | 0.35             | 0.44             | 1.03             | 10.20                                | 6.30                                 | 12.70                                | 2                       | 1                       | 0                       | 3      | 893.101  | 0.01             | 0.87              | 172.37 |        |
| P50502;Q3KNR6;F6VDH7;Q8IZP2;F5H3M7                                                                | F10A1 Hsc70-interacting protein                                  | KVEEDIKADEPS(ph)S(ph)EES(ph)DEIDK         | 0.80             | 0.95             | 0.80             | 47.46                                | 62.43                                | 31.58                                | 2                       | 1                       | 0                       | 3      | 915.695  | -0.40            | 1.00              | 194.75 |        |
| Q96JM3                                                                                            | CHAP1 Chromosome alignment-maintaining phosphoprotein 1          | SSVSPSSWKS(ph)PPAS(ph)PESWK               | 0.41             | 0.80             | 1.11             | 9.96                                 | 7.79                                 | 15.76                                | 2                       | 0                       | 0                       | 2      | 1139.477 | 0.73             | 0.82              | 115.33 |        |
| P31350;HOY855                                                                                     | RIR2 Ribonucleoside-diphosphate reductase subunit M2             | VPIAIPDTPQQQIS(ph)PKIGSIVDKENTPPAISGR     | 0.54             | 0.80             | 1.74             | 26.09                                | 23.59                                | 41.04                                | 2                       | 0                       | 0                       | 3      | 1292.029 | 0.06             | 1.00              | 258.14 |        |
| E9PCT1;Q8YB3;A9Z1X7                                                                               | E9PCT1 Serine/arginine repetitive matrix 1                       | RS(ph)PS(ph)ASPPRR                        | 1.40             | 1.07             | 1.06             | 54.75                                | 17.56                                | 34.64                                | 2                       | 0                       | 0                       | 3      | 461.881  | 0.61             | 0.56              | 149.41 |        |
| Q60841                                                                                            | IF2P Eukaryotic translation initiation factor 5B                 | VEVMY(ph)S(ph)GSDDDDDFKNPKPK              | 1.36             | 1.16             | 1.04             | 40.24                                | 44.70                                | 21.52                                | 2                       | 0                       | 0                       | 4      | 591.485  | -0.51            | 0.84              | 268.65 |        |
| Q9UQ35;F5GWZ7                                                                                     | SRRM2 Serine/arginine repetitive matrix protein 2                | S(ph)RS(ph)GSS(ph)QEIWDKVPASPOER          | 1.44             | 1.05             | 0.67             | 14.13                                | 26.51                                | 42.90                                | 2                       | 0                       | 0                       | 3      | 795.656  | 0.10             | 0.87              | 241.38 |        |
| P45985;B4DH44                                                                                     | MP2K4 Dual specificity mitogen-activated protein kinase kinase 4 | IKIS(ph)PEQHWDFEAEDIKDIEIGR               | 1.82             | 1.07             | 0.72             | 17.19                                | 10.34                                | 25.43                                | 2                       | 0                       | 0                       | 3      | 959.799  | -0.06            | 1.00              | 136.43 |        |

**Table S1. List of phosphorylated peptides significantly regulated by DOI and/or lisuride.**

For each phosphorylation site, the leading protein accession number from the human complete proteome set database (<http://www.uniprot.org>), the protein name, the sequence of the peptide carrying the phosphorylation site(s), normalized SILAC ratios M/L (lisuride/vehicle), H/L (DOI/vehicle) and H/M (DOI/lisuride), ratio variability (%), the number of biological replicates where those ratios have been found significantly different from 1 according to the calculation of the B significance, the charge state, the mass over charge of the detected phosphopeptide, the deviation (in ppm) of the measured mass over charge, the probability of phosphorylation site assignment and the peptide Andromeda score for identification are indicated.
